# Supplementary material
Source: publisher figshare collection journal article supplement (https://acs.figshare.com/ndownloader/files/3625791)
Supplement: Supplementary file 1 [file 3625791]

 
data_shelx
 
_audit_creation_method            'SHELXL-2014/7'
_shelx_SHELXL_version_number      '2014/7'
_chemical_name_systematic         ?
_chemical_name_common             ?
_chemical_melting_point           ?
_chemical_formula_moiety          ?
_chemical_formula_sum
 'C21 H16 N5 O5 Re' 
_chemical_formula_weight          604.59

loop_
 _atom_type_symbol
 _atom_type_description
 _atom_type_scat_dispersion_real
 _atom_type_scat_dispersion_imag
 _atom_type_scat_source
 'C'  'C'   0.0181   0.0091
 'International Tables Vol C Tables 4.2.6.8 and 6.1.1.4'
 'H'  'H'   0.0000   0.0000
 'International Tables Vol C Tables 4.2.6.8 and 6.1.1.4'
 'N'  'N'   0.0311   0.0180
 'International Tables Vol C Tables 4.2.6.8 and 6.1.1.4'
 'O'  'O'   0.0492   0.0322
 'International Tables Vol C Tables 4.2.6.8 and 6.1.1.4'
 'Re'  'Re'  -5.2083   5.8923
 'International Tables Vol C Tables 4.2.6.8 and 6.1.1.4'
 
_space_group_crystal_system       monoclinic
_space_group_IT_number            14
_space_group_name_H-M_alt         'P 21/c'
_space_group_name_Hall            '-P 2ybc'
 
_shelx_space_group_comment
;
The symmetry employed for this shelxl refinement is uniquely defined
by the following loop, which should always be used as a source of
symmetry information in preference to the above space-group names.
They are only intended as comments.
;
 
loop_
 _space_group_symop_operation_xyz
 'x, y, z'
 '-x, y+1/2, -z+1/2'
 '-x, -y, -z'
 'x, -y-1/2, z-1/2'
 
_cell_length_a                    16.4614(2)
_cell_length_b                    7.75170(10)
_cell_length_c                    16.0826(2)
_cell_angle_alpha                 90
_cell_angle_beta                  91.4930(10)
_cell_angle_gamma                 90
_cell_volume                      2051.50(4)
_cell_formula_units_Z             4
_cell_measurement_temperature     130.0(2)
_cell_measurement_reflns_used   4979
_cell_measurement_theta_min     2.6839
_cell_measurement_theta_max     73.0537
 
_exptl_crystal_description        rod
_exptl_crystal_colour             'yellow-brown'
_exptl_crystal_density_meas       ?
_exptl_crystal_density_method     ?
_exptl_crystal_density_diffrn     1.957          
_exptl_crystal_F_000              1168
_exptl_transmission_factor_min    ?
_exptl_transmission_factor_max    ?
_exptl_crystal_size_max                            0.2992
_exptl_crystal_size_mid                            0.0860
_exptl_crystal_size_min                            0.0360
_exptl_absorpt_coefficient_mu     11.988
_shelx_estimated_absorpt_T_min    ?
_shelx_estimated_absorpt_T_max    ?
_exptl_absorpt_correction_T_min                     0.109
_exptl_absorpt_correction_T_max                     0.666
_exptl_absorpt_correction_type            'gaussian'
_exptl_absorpt_process_details
;
CrysAlis RED, Oxford Diffraction Ltd.,
Version 1.171.32.15 (release 10-01-2008 CrysAlis171 .NET)
(compiled Jan 10 2008,16:37:18)
Numerical absorption correction based on gaussian integration over
			a multifaceted crystal model
;
_exptl_absorpt_special_details    ?
_diffrn_ambient_temperature       130.02)
_diffrn_radiation_wavelength 1.5418
_diffrn_radiation_type 'Cu K\a'
_diffrn_radiation_source 'Enhance (Cu) X-ray Source'
_diffrn_radiation_monochromator 'graphite'
_diffrn_measurement_device_type   'XCalibur CCD diffractometer'
_diffrn_measurement_method        'phi and omega scans'
_diffrn_detector_area_resol_mean  ?
_diffrn_reflns_number             7332
_diffrn_reflns_av_unetI/netI      0.0321
_diffrn_reflns_av_R_equivalents   0.0332
_diffrn_reflns_limit_h_min        -19
_diffrn_reflns_limit_h_max        19
_diffrn_reflns_limit_k_min        -6
_diffrn_reflns_limit_k_max        9
_diffrn_reflns_limit_l_min        -14
_diffrn_reflns_limit_l_max        19
_diffrn_reflns_theta_min          2.685
_diffrn_reflns_theta_max          67.500
_diffrn_reflns_theta_full         67.500
_diffrn_measured_fraction_theta_max   0.997
_diffrn_measured_fraction_theta_full  0.997
_diffrn_reflns_Laue_measured_fraction_max    0.997
_diffrn_reflns_Laue_measured_fraction_full   0.997
_diffrn_reflns_point_group_measured_fraction_max   0.997
_diffrn_reflns_point_group_measured_fraction_full  0.997
_reflns_number_total              3693
_reflns_number_gt                 3150
_reflns_threshold_expression      'I > 2\s(I)'
_reflns_Friedel_coverage          0.000
_reflns_Friedel_fraction_max      .
_reflns_Friedel_fraction_full     .
 
_reflns_special_details
;
 Reflections were merged by SHELXL according to the crystal
 class for the calculation of statistics and refinement.
 
 _reflns_Friedel_fraction is defined as the number of unique
 Friedel pairs measured divided by the number that would be
 possible theoretically, ignoring centric projections and
 systematic absences.
;
 
_computing_data_collection
;
CrysAlis CCD, Oxford Diffraction Ltd.,
Version 1.171.32.15 (release 10-01-2008 CrysAlis171 .NET)
(compiled Jan 10 2008,16:37:18)
;
_computing_cell_refinement
;
CrysAlis RED, Oxford Diffraction Ltd.,
Version 1.171.32.15 (release 10-01-2008 CrysAlis171 .NET)
(compiled Jan 10 2008,16:37:18)
;
_computing_data_reduction
;
CrysAlis RED, Oxford Diffraction Ltd.,
Version 1.171.32.15 (release 10-01-2008 CrysAlis171 .NET)
(compiled Jan 10 2008,16:37:18)
;
_computing_structure_solution     ?
_computing_structure_refinement 'SHELXL-2014/7 (Sheldrick, 2014)'
_computing_molecular_graphics     ?
_computing_publication_material   ?
_refine_special_details           ?
_refine_ls_structure_factor_coef  Fsqd
_refine_ls_matrix_type            full
_refine_ls_weighting_scheme       calc
_refine_ls_weighting_details
'w=1/[\s^2^(Fo^2^)+(0.0648P)^2^] where P=(Fo^2^+2Fc^2^)/3'
_atom_sites_solution_primary      ?
_atom_sites_solution_secondary    ?
_atom_sites_solution_hydrogens    geom
_refine_ls_hydrogen_treatment     constr
_refine_ls_extinction_method      none
_refine_ls_extinction_coef        .
_refine_ls_number_reflns          3693
_refine_ls_number_parameters      290
_refine_ls_number_restraints      0
_refine_ls_R_factor_all           0.0387
_refine_ls_R_factor_gt            0.0333
_refine_ls_wR_factor_ref          0.0944
_refine_ls_wR_factor_gt           0.0923
_refine_ls_goodness_of_fit_ref    1.049
_refine_ls_restrained_S_all       1.049
_refine_ls_shift/su_max           0.001
_refine_ls_shift/su_mean          0.000
 
loop_
 _atom_site_label
 _atom_site_type_symbol
 _atom_site_fract_x
 _atom_site_fract_y
 _atom_site_fract_z
 _atom_site_U_iso_or_equiv
 _atom_site_adp_type
 _atom_site_occupancy
 _atom_site_site_symmetry_order  
 _atom_site_calc_flag
 _atom_site_refinement_flags_posn
 _atom_site_refinement_flags_adp
 _atom_site_refinement_flags_occupancy
 _atom_site_disorder_assembly
 _atom_site_disorder_group
C1 C 0.5512(3) 0.8042(6) 0.5307(3) 0.0222(9) Uani 1 1 d . . . . .
C2 C 0.5550(3) 0.7470(6) 0.4480(3) 0.0219(10) Uani 1 1 d . . . . .
H2 H 0.6025 0.7583 0.4185 0.026 Uiso 1 1 calc R U . . .
C3 C 0.4861(3) 0.6733(6) 0.4115(3) 0.0238(10) Uani 1 1 d . . . . .
C4 C 0.4143(3) 0.6486(6) 0.4523(3) 0.0276(11) Uani 1 1 d . . . . .
H4 H 0.3700 0.5950 0.4262 0.033 Uiso 1 1 calc R U . . .
C5 C 0.4109(3) 0.7067(7) 0.5333(3) 0.0332(12) Uani 1 1 d . . . . .
H5 H 0.3633 0.6927 0.5625 0.040 Uiso 1 1 calc R U . . .
C6 C 0.4776(3) 0.7857(7) 0.5715(3) 0.0275(11) Uani 1 1 d . . . . .
H6 H 0.4733 0.8274 0.6255 0.033 Uiso 1 1 calc R U . . .
C7 C 0.6181(3) 0.8834(6) 0.5771(3) 0.0212(9) Uani 1 1 d . . . . .
H7 H 0.6031 0.9516 0.6218 0.025 Uiso 1 1 calc R U . . .
C8 C 0.8028(3) 0.7658(6) 0.4956(3) 0.0210(9) Uani 1 1 d . . . . .
C9 C 0.8370(3) 0.6616(6) 0.4333(3) 0.0243(10) Uani 1 1 d . . . . .
H9 H 0.8032 0.6018 0.3962 0.029 Uiso 1 1 calc R U . . .
C10 C 0.9192(3) 0.6483(6) 0.4274(3) 0.0262(11) Uani 1 1 d . . . . .
H10 H 0.9414 0.5768 0.3876 0.031 Uiso 1 1 calc R U . . .
C11 C 0.9701(3) 0.7433(7) 0.4820(3) 0.0285(11) Uani 1 1 d . . . . .
H11 H 1.0263 0.7386 0.4777 0.034 Uiso 1 1 calc R U . . .
C12 C 0.9351(3) 0.8428(6) 0.5415(3) 0.0225(10) Uani 1 1 d . . . . .
H12 H 0.9688 0.9044 0.5780 0.027 Uiso 1 1 calc R U . . .
C13 C 0.7165(3) 1.0846(6) 0.7254(3) 0.0248(10) Uani 1 1 d . . . . .
C14 C 0.8818(3) 1.0698(6) 0.7082(3) 0.0205(9) Uani 1 1 d . . . . .
C15 C 0.7884(3) 1.2150(6) 0.5934(3) 0.0220(10) Uani 1 1 d . . . . .
N5 N 0.4912(2) 0.6136(6) 0.3242(3) 0.0285(9) Uani 1 1 d . . . . .
C16 C 0.8652(3) 0.6556(6) 0.7212(3) 0.0232(10) Uani 1 1 d . . . . .
H16 H 0.9102 0.6934 0.6926 0.028 Uiso 1 1 calc R U . . .
C17 C 0.8742(3) 0.5186(6) 0.7752(3) 0.0245(11) Uani 1 1 d . . . . .
H17 H 0.9248 0.4665 0.7826 0.029 Uiso 1 1 calc R U . . .
C18 C 0.8080(3) 0.4575(6) 0.8189(3) 0.0226(9) Uani 1 1 d . . . . .
C19 C 0.7334(3) 0.5355(6) 0.8004(3) 0.0232(10) Uani 1 1 d . . . . .
H19 H 0.6867 0.4955 0.8254 0.028 Uiso 1 1 calc R U . . .
C20 C 0.7284(3) 0.6711(6) 0.7455(3) 0.0237(10) Uani 1 1 d . . . . .
H20 H 0.6777 0.7194 0.7338 0.028 Uiso 1 1 calc R U . . .
C21 C 0.8180(3) 0.3239(6) 0.8859(3) 0.0276(10) Uani 1 1 d . . . . .
H21A H 0.8406 0.3767 0.9353 0.041 Uiso 1 1 calc R U . . .
H21B H 0.8539 0.2347 0.8676 0.041 Uiso 1 1 calc R U . . .
H21C H 0.7660 0.2748 0.8976 0.041 Uiso 1 1 calc R U . . .
N1 N 0.6970(2) 0.8735(5) 0.5658(2) 0.0211(8) Uani 1 1 d . . . . .
N2 N 0.7217(2) 0.7743(5) 0.4999(2) 0.0206(8) Uani 1 1 d . . . . .
N3 N 0.8533(2) 0.8558(4) 0.5496(2) 0.0178(8) Uani 1 1 d . . . . .
N4 N 0.7935(2) 0.7373(5) 0.7080(2) 0.0187(8) Uani 1 1 d . . . . .
O1 O 0.6722(2) 1.1400(5) 0.7724(2) 0.0375(9) Uani 1 1 d . . . . .
O2 O 0.9379(2) 1.1168(5) 0.7462(2) 0.0296(8) Uani 1 1 d . . . . .
O3 O 0.7898(2) 1.3529(4) 0.5674(2) 0.0321(8) Uani 1 1 d . . . . .
O4 O 0.5512(2) 0.6497(6) 0.2853(2) 0.0432(10) Uani 1 1 d . . . . .
O5 O 0.4344(3) 0.5315(6) 0.2949(3) 0.0500(12) Uani 1 1 d . . . . .
Re1 Re 0.78948(2) 0.99072(2) 0.64447(2) 0.01783(11) Uani 1 1 d . . . . .
 
loop_
 _atom_site_aniso_label
 _atom_site_aniso_U_11
 _atom_site_aniso_U_22
 _atom_site_aniso_U_33
 _atom_site_aniso_U_23
 _atom_site_aniso_U_13
 _atom_site_aniso_U_12
C1 0.022(2) 0.022(2) 0.022(2) 0.003(2) -0.0044(18) 0.0023(19)
C2 0.017(2) 0.022(2) 0.027(3) 0.005(2) -0.0009(18) 0.0012(17)
C3 0.023(2) 0.024(2) 0.023(2) 0.002(2) -0.0023(19) 0.0065(19)
C4 0.019(2) 0.026(3) 0.037(3) 0.001(2) -0.007(2) -0.0007(19)
C5 0.021(2) 0.041(3) 0.038(3) 0.004(3) 0.006(2) 0.001(2)
C6 0.024(2) 0.034(3) 0.025(3) 0.002(2) 0.0006(19) 0.005(2)
C7 0.020(2) 0.021(2) 0.022(2) -0.0012(19) -0.0016(18) 0.0023(18)
C8 0.026(2) 0.019(2) 0.018(2) 0.0037(18) -0.0039(18) 0.0016(18)
C9 0.031(2) 0.019(2) 0.022(2) -0.0033(19) -0.0058(19) 0.0015(18)
C10 0.033(2) 0.024(3) 0.022(2) -0.0011(19) 0.005(2) 0.0058(19)
C11 0.022(2) 0.034(3) 0.029(3) -0.001(2) 0.003(2) 0.003(2)
C12 0.022(2) 0.024(2) 0.022(2) -0.0006(19) -0.0022(18) -0.0024(18)
C13 0.022(2) 0.022(2) 0.030(3) 0.000(2) -0.002(2) -0.0017(18)
C14 0.026(2) 0.015(2) 0.021(2) -0.0040(19) 0.0013(19) -0.0009(18)
C15 0.027(2) 0.015(2) 0.024(2) -0.007(2) -0.0022(19) 0.0025(18)
N5 0.025(2) 0.029(2) 0.031(2) -0.0004(19) -0.0069(18) 0.0016(17)
C16 0.018(2) 0.029(3) 0.023(2) 0.001(2) 0.0016(18) -0.0028(18)
C17 0.026(2) 0.020(2) 0.027(3) 0.0034(19) -0.004(2) 0.0007(18)
C18 0.027(2) 0.020(2) 0.021(2) -0.003(2) -0.0028(19) -0.004(2)
C19 0.021(2) 0.022(2) 0.026(3) 0.002(2) 0.0010(19) -0.005(2)
C20 0.020(2) 0.024(2) 0.027(2) 0.000(2) -0.0018(18) -0.0028(18)
C21 0.033(3) 0.025(2) 0.024(2) 0.005(2) -0.002(2) -0.005(2)
N1 0.0240(19) 0.0168(19) 0.023(2) 0.0021(16) -0.0012(16) 0.0012(15)
N2 0.0239(19) 0.0169(19) 0.0208(19) -0.0027(16) -0.0024(15) -0.0012(15)
N3 0.0208(18) 0.0130(18) 0.0196(19) 0.0024(15) 0.0018(15) 0.0009(14)
N4 0.0239(19) 0.0152(18) 0.0170(19) -0.0012(15) -0.0019(15) 0.0010(15)
O1 0.036(2) 0.037(2) 0.040(2) -0.0125(18) 0.0127(17) -0.0049(17)
O2 0.0241(17) 0.0332(19) 0.0310(19) -0.0059(16) -0.0071(15) -0.0010(15)
O3 0.041(2) 0.022(2) 0.034(2) 0.0003(15) 0.0001(16) 0.0010(15)
O4 0.032(2) 0.069(3) 0.029(2) -0.012(2) 0.0050(17) -0.0129(19)
O5 0.037(2) 0.073(3) 0.039(2) -0.015(2) -0.0093(19) -0.022(2)
Re1 0.01924(15) 0.01595(15) 0.01820(16) -0.00079(8) -0.00120(10) -0.00011(7)
 
_geom_special_details
;
 All esds (except the esd in the dihedral angle between two l.s. planes)
 are estimated using the full covariance matrix.  The cell esds are taken
 into account individually in the estimation of esds in distances, angles
 and torsion angles; correlations between esds in cell parameters are only
 used when they are defined by crystal symmetry.  An approximate (isotropic)
 treatment of cell esds is used for estimating esds involving l.s. planes.
;
 
loop_
 _geom_bond_atom_site_label_1
 _geom_bond_atom_site_label_2
 _geom_bond_distance
 _geom_bond_site_symmetry_2
 _geom_bond_publ_flag
C1 C6 1.400(6) . ?
C1 C2 1.405(6) . ?
C1 C7 1.451(6) . ?
C2 C3 1.386(6) . ?
C3 C4 1.380(6) . ?
C3 N5 1.483(6) . ?
C4 C5 1.381(7) . ?
C5 C6 1.387(7) . ?
C7 N1 1.319(6) . ?
C8 N2 1.342(6) . ?
C8 N3 1.376(6) . ?
C8 C9 1.415(6) . ?
C9 C10 1.361(7) . ?
C10 C11 1.406(7) . ?
C11 C12 1.367(7) . ?
C12 N3 1.359(6) . ?
C13 O1 1.148(6) . ?
C13 Re1 1.936(5) . ?
C14 O2 1.153(5) . ?
C14 Re1 1.912(4) . ?
C15 O3 1.148(6) . ?
C15 Re1 1.923(5) . ?
N5 O4 1.215(5) . ?
N5 O5 1.217(6) . ?
C16 N4 1.351(6) . ?
C16 C17 1.378(6) . ?
C17 C18 1.394(7) . ?
C18 C19 1.395(7) . ?
C18 C21 1.500(7) . ?
C19 C20 1.374(7) . ?
C20 N4 1.345(6) . ?
N1 N2 1.379(5) . ?
N1 Re1 2.155(4) . ?
N3 Re1 2.147(4) . ?
N4 Re1 2.214(4) . ?
 
loop_
 _geom_angle_atom_site_label_1
 _geom_angle_atom_site_label_2
 _geom_angle_atom_site_label_3
 _geom_angle
 _geom_angle_site_symmetry_1
 _geom_angle_site_symmetry_3
 _geom_angle_publ_flag
C6 C1 C2 118.2(4) . . ?
C6 C1 C7 117.2(4) . . ?
C2 C1 C7 124.6(4) . . ?
C3 C2 C1 118.3(4) . . ?
C4 C3 C2 123.9(4) . . ?
C4 C3 N5 118.5(4) . . ?
C2 C3 N5 117.6(4) . . ?
C3 C4 C5 117.3(4) . . ?
C4 C5 C6 120.7(5) . . ?
C5 C6 C1 121.4(5) . . ?
N1 C7 C1 129.9(4) . . ?
N2 C8 N3 121.9(4) . . ?
N2 C8 C9 118.7(4) . . ?
N3 C8 C9 119.4(4) . . ?
C10 C9 C8 120.4(4) . . ?
C9 C10 C11 119.6(4) . . ?
C12 C11 C10 118.5(4) . . ?
N3 C12 C11 123.1(4) . . ?
O1 C13 Re1 178.9(4) . . ?
O2 C14 Re1 179.4(4) . . ?
O3 C15 Re1 175.8(4) . . ?
O4 N5 O5 123.2(5) . . ?
O4 N5 C3 118.8(4) . . ?
O5 N5 C3 117.9(4) . . ?
N4 C16 C17 122.6(4) . . ?
C16 C17 C18 120.5(5) . . ?
C17 C18 C19 116.2(5) . . ?
C17 C18 C21 121.6(4) . . ?
C19 C18 C21 122.1(5) . . ?
C20 C19 C18 120.4(5) . . ?
N4 C20 C19 123.0(4) . . ?
C7 N1 N2 116.7(4) . . ?
C7 N1 Re1 125.3(3) . . ?
N2 N1 Re1 118.0(3) . . ?
C8 N2 N1 112.3(4) . . ?
C12 N3 C8 119.0(4) . . ?
C12 N3 Re1 127.5(3) . . ?
C8 N3 Re1 113.3(3) . . ?
C20 N4 C16 117.0(4) . . ?
C20 N4 Re1 122.1(3) . . ?
C16 N4 Re1 120.2(3) . . ?
C14 Re1 C15 86.43(19) . . ?
C14 Re1 C13 90.99(19) . . ?
C15 Re1 C13 87.0(2) . . ?
C14 Re1 N3 98.06(17) . . ?
C15 Re1 N3 97.81(16) . . ?
C13 Re1 N3 169.95(17) . . ?
C14 Re1 N1 171.71(17) . . ?
C15 Re1 N1 97.57(16) . . ?
C13 Re1 N1 96.45(17) . . ?
N3 Re1 N1 74.26(14) . . ?
C14 Re1 N4 91.32(17) . . ?
C15 Re1 N4 177.53(16) . . ?
C13 Re1 N4 91.99(17) . . ?
N3 Re1 N4 83.49(13) . . ?
N1 Re1 N4 84.79(13) . . ?
 
loop_
 _geom_torsion_atom_site_label_1
 _geom_torsion_atom_site_label_2
 _geom_torsion_atom_site_label_3
 _geom_torsion_atom_site_label_4
 _geom_torsion
 _geom_torsion_site_symmetry_1
 _geom_torsion_site_symmetry_2
 _geom_torsion_site_symmetry_3
 _geom_torsion_site_symmetry_4
 _geom_torsion_publ_flag
C6 C1 C2 C3 -0.8(7) . . . . ?
C7 C1 C2 C3 179.9(4) . . . . ?
C1 C2 C3 C4 -1.7(7) . . . . ?
C1 C2 C3 N5 180.0(4) . . . . ?
C2 C3 C4 C5 2.2(7) . . . . ?
N5 C3 C4 C5 -179.4(4) . . . . ?
C3 C4 C5 C6 -0.3(8) . . . . ?
C4 C5 C6 C1 -2.2(8) . . . . ?
C2 C1 C6 C5 2.7(7) . . . . ?
C7 C1 C6 C5 -177.9(5) . . . . ?
C6 C1 C7 N1 158.2(5) . . . . ?
C2 C1 C7 N1 -22.5(8) . . . . ?
N2 C8 C9 C10 -179.4(4) . . . . ?
N3 C8 C9 C10 0.9(7) . . . . ?
C8 C9 C10 C11 -2.1(7) . . . . ?
C9 C10 C11 C12 2.0(7) . . . . ?
C10 C11 C12 N3 -0.9(7) . . . . ?
C4 C3 N5 O4 172.9(5) . . . . ?
C2 C3 N5 O4 -8.6(7) . . . . ?
C4 C3 N5 O5 -6.6(7) . . . . ?
C2 C3 N5 O5 171.8(5) . . . . ?
N4 C16 C17 C18 0.3(7) . . . . ?
C16 C17 C18 C19 3.9(7) . . . . ?
C16 C17 C18 C21 -172.1(4) . . . . ?
C17 C18 C19 C20 -3.6(7) . . . . ?
C21 C18 C19 C20 172.4(4) . . . . ?
C18 C19 C20 N4 -1.0(8) . . . . ?
C1 C7 N1 N2 0.3(7) . . . . ?
C1 C7 N1 Re1 -177.0(4) . . . . ?
N3 C8 N2 N1 -3.2(6) . . . . ?
C9 C8 N2 N1 177.1(4) . . . . ?
C7 N1 N2 C8 -177.2(4) . . . . ?
Re1 N1 N2 C8 0.3(5) . . . . ?
C11 C12 N3 C8 -0.3(7) . . . . ?
C11 C12 N3 Re1 175.2(4) . . . . ?
N2 C8 N3 C12 -179.4(4) . . . . ?
C9 C8 N3 C12 0.3(6) . . . . ?
N2 C8 N3 Re1 4.5(5) . . . . ?
C9 C8 N3 Re1 -175.8(3) . . . . ?
C19 C20 N4 C16 5.2(7) . . . . ?
C19 C20 N4 Re1 -165.1(4) . . . . ?
C17 C16 N4 C20 -4.9(7) . . . . ?
C17 C16 N4 Re1 165.6(4) . . . . ?
 
_refine_diff_density_max    1.591
_refine_diff_density_min   -1.326
_refine_diff_density_rms    0.156

_shelx_res_file
;

    shelx.res created by SHELXL-2014/7

TITL JMWPD116 in P2(1)/c
CELL  1.54184  16.4614   7.7517  16.0826   90.000   91.493   90.000
ZERR     4.00   0.0002   0.0001   0.0002    0.000    0.001    0.000
LATT   1
SYMM  - X, 1/2 + Y, 1/2 - Z
SFAC  C    H    N    O    RE
UNIT  84 64 20 20 4
MERG   2
OMIT     0.00 135.00
FMAP   2
PLAN   25
ACTA
BOND
CONF
L.S.  12
WGHT    0.064800
FVAR       3.07461
C1    1    0.551165    0.804218    0.530743    11.00000    0.02245    0.02207 =
         0.02178    0.00280   -0.00436    0.00228
C2    1    0.554983    0.747016    0.448036    11.00000    0.01665    0.02188 =
         0.02723    0.00536   -0.00094    0.00119
AFIX  43
H2    2    0.602524    0.758347    0.418518    11.00000   -1.20000
AFIX   0
C3    1    0.486118    0.673264    0.411525    11.00000    0.02347    0.02448 =
         0.02334    0.00157   -0.00226    0.00654
C4    1    0.414313    0.648613    0.452253    11.00000    0.01890    0.02649 =
         0.03704    0.00118   -0.00670   -0.00074
AFIX  43
H4    2    0.369983    0.595002    0.426196    11.00000   -1.20000
AFIX   0
C5    1    0.410882    0.706716    0.533259    11.00000    0.02079    0.04112 =
         0.03787    0.00437    0.00568    0.00144
AFIX  43
H5    2    0.363318    0.692704    0.562482    11.00000   -1.20000
AFIX   0
C6    1    0.477581    0.785749    0.571537    11.00000    0.02425    0.03359 =
         0.02469    0.00241    0.00060    0.00514
AFIX  43
H6    2    0.473314    0.827373    0.625482    11.00000   -1.20000
AFIX   0
C7    1    0.618135    0.883381    0.577147    11.00000    0.02044    0.02128 =
         0.02169   -0.00118   -0.00159    0.00229
AFIX  43
H7    2    0.603088    0.951560    0.621768    11.00000   -1.20000
AFIX   0
C8    1    0.802850    0.765814    0.495614    11.00000    0.02636    0.01872 =
         0.01758    0.00366   -0.00391    0.00162
C9    1    0.837047    0.661597    0.433336    11.00000    0.03147    0.01908 =
         0.02186   -0.00332   -0.00577    0.00152
AFIX  43
H9    2    0.803204    0.601798    0.396184    11.00000   -1.20000
AFIX   0
C10   1    0.919163    0.648276    0.427436    11.00000    0.03273    0.02410 =
         0.02200   -0.00112    0.00546    0.00582
AFIX  43
H10   2    0.941433    0.576768    0.387574    11.00000   -1.20000
AFIX   0
C11   1    0.970089    0.743332    0.482000    11.00000    0.02226    0.03418 =
         0.02904   -0.00125    0.00253    0.00325
AFIX  43
H11   2    1.026280    0.738648    0.477745    11.00000   -1.20000
AFIX   0
C12   1    0.935084    0.842810    0.541459    11.00000    0.02154    0.02374 =
         0.02197   -0.00065   -0.00223   -0.00241
AFIX  43
H12   2    0.968785    0.904440    0.578029    11.00000   -1.20000
AFIX   0
C13   1    0.716521    1.084580    0.725377    11.00000    0.02242    0.02193 =
         0.02977    0.00035   -0.00192   -0.00173
C14   1    0.881806    1.069816    0.708246    11.00000    0.02570    0.01525 =
         0.02054   -0.00401    0.00125   -0.00090
C15   1    0.788403    1.215019    0.593362    11.00000    0.02720    0.01493 =
         0.02365   -0.00678   -0.00221    0.00245
N5    3    0.491198    0.613624    0.324201    11.00000    0.02496    0.02902 =
         0.03120   -0.00041   -0.00693    0.00162
C16   1    0.865175    0.655623    0.721158    11.00000    0.01826    0.02883 =
         0.02267    0.00130    0.00160   -0.00277
AFIX  43
H16   2    0.910244    0.693381    0.692593    11.00000   -1.20000
AFIX   0
C17   1    0.874197    0.518577    0.775187    11.00000    0.02622    0.02027 =
         0.02671    0.00343   -0.00397    0.00071
AFIX  43
H17   2    0.924764    0.466481    0.782555    11.00000   -1.20000
AFIX   0
C18   1    0.808050    0.457473    0.818883    11.00000    0.02724    0.01968 =
         0.02080   -0.00251   -0.00276   -0.00422
C19   1    0.733377    0.535475    0.800435    11.00000    0.02148    0.02236 =
         0.02570    0.00156    0.00096   -0.00514
AFIX  43
H19   2    0.686684    0.495450    0.825441    11.00000   -1.20000
AFIX   0
C20   1    0.728406    0.671110    0.745530    11.00000    0.02005    0.02379 =
         0.02700    0.00021   -0.00185   -0.00277
AFIX  43
H20   2    0.677678    0.719373    0.733756    11.00000   -1.20000
AFIX   0
C21   1    0.818033    0.323904    0.885886    11.00000    0.03321    0.02530 =
         0.02425    0.00459   -0.00238   -0.00469
AFIX 137
H21A  2    0.840568    0.376688    0.935314    11.00000   -1.50000
H21B  2    0.853883    0.234746    0.867586    11.00000   -1.50000
H21C  2    0.766034    0.274811    0.897630    11.00000   -1.50000
AFIX   0
N1    3    0.697044    0.873512    0.565776    11.00000    0.02401    0.01678 =
         0.02254    0.00213   -0.00116    0.00121
N2    3    0.721662    0.774268    0.499906    11.00000    0.02385    0.01688 =
         0.02081   -0.00269   -0.00236   -0.00119
N3    3    0.853347    0.855824    0.549608    11.00000    0.02082    0.01299 =
         0.01962    0.00235    0.00176    0.00091
N4    3    0.793508    0.737326    0.708018    11.00000    0.02391    0.01523 =
         0.01698   -0.00124   -0.00191    0.00104
O1    4    0.672244    1.140040    0.772421    11.00000    0.03566    0.03688 =
         0.04042   -0.01247    0.01271   -0.00493
O2    4    0.937926    1.116824    0.746222    11.00000    0.02409    0.03317 =
         0.03102   -0.00593   -0.00712   -0.00095
O3    4    0.789759    1.352903    0.567372    11.00000    0.04082    0.02172 =
         0.03372    0.00028    0.00007    0.00099
O4    4    0.551184    0.649652    0.285328    11.00000    0.03206    0.06871 =
         0.02899   -0.01158    0.00501   -0.01289
O5    4    0.434358    0.531462    0.294882    11.00000    0.03712    0.07339 =
         0.03886   -0.01503   -0.00932   -0.02216
RE1   5    0.789481    0.990716    0.644467    11.00000    0.01924    0.01595 =
         0.01820   -0.00079   -0.00120   -0.00011
HKLF    4

REM  JMWPD116 in P2(1)/c
REM R1 =  0.0333 for    3150 Fo > 4sig(Fo)  and  0.0387 for all    3693 data
REM    290 parameters refined using      0 restraints

END

WGHT      0.0647      0.0000

REM Highest difference peak  1.591,  deepest hole -1.326,  1-sigma level  0.156
Q1    1   0.7229  0.9896  0.6370  11.00000  0.05    1.59
Q2    1   0.7659  0.9855  0.6966  11.00000  0.05    1.42
Q3    1   0.8534  0.9835  0.6521  11.00000  0.05    1.32
Q4    1   0.8137  0.9889  0.5946  11.00000  0.05    1.27
Q5    1   0.9009  0.9901  0.5976  11.00000  0.05    0.92
Q6    1   0.6780  0.9907  0.6862  11.00000  0.05    0.80
Q7    1   0.7844  0.9926  0.7602  11.00000  0.05    0.74
Q8    1   0.9680  0.8329  0.6041  11.00000  0.05    0.58
Q9    1   0.5978  0.8671  0.6841  11.00000  0.05    0.51
Q10   1   0.6611  1.0755  0.7425  11.00000  0.05    0.49
Q11   1   0.8844  0.6192  0.6154  11.00000  0.05    0.48
Q12   1   0.7390  1.0949  0.6693  11.00000  0.05    0.47
Q13   1   0.7849  1.0060  0.5180  11.00000  0.05    0.47
Q14   1   0.6396  0.7219  0.6783  11.00000  0.05    0.45
Q15   1   0.6484  0.9336  0.7327  11.00000  0.05    0.45
Q16   1   0.8412  0.6324  0.6838  11.00000  0.05    0.44
Q17   1   0.7170  1.0018  0.4572  11.00000  0.05    0.44
Q18   1   0.7166  0.7822  0.7243  11.00000  0.05    0.43
Q19   1   0.7615  0.5682  0.3188  11.00000  0.05    0.43
Q20   1   0.9843  1.1142  0.5981  11.00000  0.05    0.43
Q21   1   0.7973  1.0856  0.5839  11.00000  0.05    0.42
Q22   1   0.7844  0.3483  0.9445  11.00000  0.05    0.42
Q23   1   0.9742  0.8780  0.4425  11.00000  0.05    0.41
Q24   1   0.5856  0.6913  0.2364  11.00000  0.05    0.41
Q25   1   0.8750  0.7590  0.6528  11.00000  0.05    0.41
;
_shelx_res_checksum   93779

_shelx_hkl_file
;
   1   0   0 5550.32 354.253   6
  -1   0   0 5597.54 352.294   6
   2   0   0 541648. 3852.04   6
  -2   0   0 534888. 3856.82   6
  -3   0   0 875494. 5853.90   6
   3   0   0 953850. 24046.6   6
  -4   0   0 282870. 3750.56   6
   4   0   0 313008. 3950.71   6
   5   0   0 475680. 5189.41   6
  -5   0   0 431819. 5001.12   6
   6   0   0 12714.7 742.233   1
  -6   0   0 10385.6 1025.56   6
   6   0   0 12279.8 1069.93   6
   7   0   0 328582. 3191.40   1
   8   0   0 272031. 3010.85   1
   9   0   0 159061. 2418.09   1
  10   0   0 231889. 3014.87   1
  11   0   0 51880.0 1544.59   1
  12   0   0 374767. 4186.02   1
  13   0   0 16486.9 972.940   1
  14   0   0 251194. 3566.65   2
  15   0   0 92027.5 2139.76   2
  16   0   0 37850.5 1371.10   2
  16   0   0 37217.5 1392.41  14
  17   0   0 120328. 2284.34  14
  18   0   0 10112.7 726.110  14
  19   0   0 67132.8 1388.71  14
  20   0   0 1836.12 330.526  14
   0   1   0 174.916 1442.62   0
   0  -1   0 144.906 85.4497   5
  -1   1   0 72009.4 1052.49   6
   1  -1   0 68850.4 1078.02   6
  -2   1   0 25092.9 816.982   6
  -2   1   0 24492.5 2000.69   0
   2  -1   0 25790.0 850.353   6
  -3   1   0 626.802 487.670   6
  -3  -1   0 421.971 385.006   6
   3  -1   0 620.756 497.889   6
  -3   1   0 80.4465 1052.87   0
   4  -1   0 2029.60 656.949   6
  -4  -1   0 1632.11 603.032   6
  -4   1   0 1409.73 890.067   0
  -4   1   0 1664.33 609.102   6
  -5  -1   0 9394.68 973.294   6
   5   1   0 10316.3 751.037   1
   5  -1   0 9456.44 1061.23   6
  -5   1   0 8420.24 977.349   6
   6   1   0 20847.2 934.434   1
   6  -1   0 22553.8 1508.06   6
   7   1   0 1594.31 498.131   1
  -7  -1   0 1473.59 781.865   6
   7  -1   0 1335.83 413.528   1
   8  -1   0 15274.6 743.470   1
   8   1   0 15836.5 875.828   1
   9   1   0 2230.28 496.412   1
  10   1   0 1600.13 458.476   1
  11   1   0 388.590 393.856   1
  12   1   0 9865.15 809.846   1
  13   1   0 31554.7 1358.88   1
  14   1   0 16819.3 1020.45   1
  14  -1   0 17324.1 1020.95   2
  14   1   0 17520.7 1062.39   2
  14   1   0 16614.7 988.673  14
  15   1   0 1833.67 518.237   2
  15   1   0 1705.07 529.249   1
  15  -1   0 1762.42 534.570   2
  15   1   0 1715.03 536.109  14
  16   1   0 19995.0 1026.75  14
  16   1   0 20529.6 1046.42   2
  17  -1   0 1789.37 515.245  14
  17   1   0 2091.87 492.021   2
  17   1   0 2030.21 513.074  14
  18   1   0 42.2765 379.426  14
  18  -1   0-68.9871 407.537  14
  19  -1   0 1053.85 380.645  14
  19   1   0 855.567 362.353  14
  20  -1   0 304.189 278.580  14
   0  -2   0 90648.1 1537.37   6
   0  -2   0 87167.0 882.123   5
  -1   2   0 74783.4 3981.44   0
   1   2   0 80653.2 3023.03   0
   1  -2   0 83634.4 1583.48   6
   1   2   0 74728.3 844.659   5
   2   2   0 460012. 2568.45   5
   2  -2   0 470946. 4100.55   6
  -3   2   0 128160. 2266.69   6
   3  -2   0 132778. 2483.04   6
  -4   2   0 42963.1 2532.63   0
  -4  -2   0 43720.3 1286.11   6
   4   2   0 45451.4 1331.04   1
   4  -2   0 44968.0 1686.58   6
  -4   2   0 45488.5 1569.75   6
  -5  -2   0 251051. 3491.48   6
   5   2   0 267608. 3067.84   1
  -6  -2   0 16153.6 1153.41   6
   6   2   0 16035.8 882.133   1
   7   2   0 278732. 3303.38   1
   8   2   0 15079.0 877.500   1
   9   2   0 182715. 2855.80   1
  10   2   0 133414. 2513.29   1
  11   2   0 37537.8 1417.57   1
  12   2   0 162956. 2966.06   1
  13   2   0 2930.55 614.688   2
  13   2   0 2935.79 645.540  14
  13   2   0 3521.01 629.563   1
  14   2   0 113286. 2391.09   2
  14   2   0 118179. 2530.26   1
  15   2   0 29060.6 1225.07   2
  15   2   0 29315.4 1278.57   1
  16   2   0 22781.5 1030.39  14
  16   2   0 19168.0 978.737   2
  17  -2   0 48545.8 1460.01  14
  17   2   0 48303.5 1376.33   2
  18  -2   0 6152.99 586.772  14
  18   2   0 6382.07 538.944  14
  19  -2   0 63197.7 1281.11  14
 -20   2   0 795.595 380.433   4
   0  -3   0 323.534 390.127   6
   0   3   0 91.9708 294.456   7
   0   3   0-45.9665 1225.65   0
  -1   3   0 3738.57 350.267   7
  -1  -3   0 3883.95 536.468   6
  -1   3   0 3112.03 1611.35   0
   1  -3   0 1881.79 203.513   5
   1   3   0 4822.85 431.544   7
   1  -3   0 3335.48 521.590   6
   2  -3   0 399.226 196.646   5
  -2   3   0 697.693 1379.87   0
   2   3   0 560.306 356.503   7
   2  -3   0 1021.52 521.574   6
  -2   3   0 767.697 273.044   7
  -3   3   0 4384.17 360.365   7
  -3   3   0 4155.42 1323.46   0
   3   3   0 4207.45 571.828   1
   3   3   0 4645.16 528.571   7
  -4   3   0 6724.22 408.914   7
   4   3   0 6092.03 745.421   1
   4   3   0 5986.96 617.077   7
   5   3   0 10282.3 801.842   1
   6   3   0 7191.95 703.010   1
   7   3   0 9801.74 765.949   1
   8   3   0 3184.85 561.011   1
   9   3   0 766.789 418.424   1
  10   3   0 264.601 442.350   1
  11   3   0 2245.81 581.219   1
  12   3   0 13266.8 965.120   1
  12   3   0 13286.6 921.970   2
  12   3   0 13210.6 947.502   9
  12   3   0 13657.5 942.468   7
  13   3   0 505.852 485.840   2
  13   3   0 617.977 488.186   7
  13   3   0-102.950 472.864   1
  14   3   0 442.649 478.186   1
  14   3   0 797.686 518.661   2
  15   3   0 2954.98 552.085   2
  16   3   0 793.238 420.689   2
  17  -3   0-13.6388 425.731  14
  18  -3   0 2513.10 439.890  14
 -18   3   0 2289.30 639.648   4
 -19   3   0 350.575 440.540   4
  19  -3   0 778.905 293.883  14
   0   4   0 201509. 2231.05   7
  -1   4   0 19591.4 730.787   7
   1   4   0 20692.9 805.387   7
  -2   4   0 333245. 2732.74   7
   2   4   0 317618. 3138.22   7
  -3   4   0 213510. 2143.28   7
   3   4   0 190032. 2591.18   7
   4   4   0 171073. 2616.63   7
   5   4   0 437590. 4445.28   1
   5   4   0 391721. 4161.94   7
   6   4   0 9487.21 817.924   7
   6   4   0 11205.1 876.500   1
   7   4   0 188700. 3210.58   7
   7   4   0 212379. 3320.26   1
   8   4   0 33053.9 1453.62   7
   8   4   0 35097.0 1426.93   1
   9   4   0 217414. 3548.12   7
   9   4   0 229322. 3541.09   1
  10   4   0 134925. 2785.22   1
  10   4   0 127118. 2694.99   7
  11   4   0 7763.34 791.905   1
  11   4   0 7311.01 800.289   7
  11   4   0 7739.39 822.400   9
  12   4   0 203396. 3294.82   7
  12   4   0 202106. 3222.81   9
  12   4   0 201940. 3328.17   1
  13   4   0 16638.9 1017.61   7
  13   4   0 15466.9 1021.50   1
  13   4   0 16281.3 920.053   2
  14   4   0 75871.8 1712.96   2
 -15   4   0 31201.9 1551.96   4
  15   4   0 32514.4 1083.37   2
 -16   4   0 43545.9 1657.13   4
 -17   4   0 53531.6 1585.33   4
  17  -4   0 63875.5 1294.90  14
 -18   4   0 1912.68 503.662   4
   0   5   0 284.767 366.470   7
  -1   5   0 26357.3 978.821   7
   1   5   0 25936.2 1021.47   7
  -2   5   0 266.251 355.600   7
   2   5   0 745.541 421.251   7
   3   5   0 46036.3 1462.54   7
   4   5   0 19534.6 1046.28   7
   5   5   0 10941.5 884.197   7
   6   5   0 58442.2 1883.73   7
   7   5   0 4445.40 757.831   7
   8   5   0 29712.5 1489.53   7
   9   5   0 11249.6 984.057   7
   9   5   0 10087.6 911.801   9
   9   5   0 10449.7 886.470   1
  -9   5   0 11710.8 1185.96   4
  10   5   0 11685.7 946.438   9
  10   5   0 15123.3 1074.43   7
 -10   5   0 14696.2 1353.95   4
  11   5   0 23752.0 1243.53   7
 -11   5   0 25233.6 1613.07   4
  11   5   0 24103.6 1209.66   9
  11   5   0 20995.7 1117.48   1
  12   5   0 688.115 569.924   1
  12   5   0 736.356 496.577   9
 -12   5   0 1668.94 879.991   4
  12   5   0 1206.44 548.732   7
 -13   5   0 3438.72 909.515   4
 -14   5   0 8696.70 1001.92   4
 -15   5   0 5920.67 819.041   4
 -16   5   0 3576.71 646.504   4
 -17   5   0 1686.36 463.661   4
   0   6   0 298931. 3569.13   7
  -1   6   0 14318.0 860.209   7
   1   6   0 15336.1 946.076   7
   2   6   0 142870. 2663.57   7
   3   6   0 125900. 2572.46   7
   4   6   0 27873.6 1304.00   7
  -5   6   0 133691. 2568.91   4
   5   6   0 133990. 2867.87   9
   5   6   0 116474. 2634.67   7
  -5   6   0 126969. 3249.19  15
   5   6   0 122618. 2877.09  11
   5   6   0 128637. 3038.56  15
   6   6   0 861.709 645.969  11
   6   6   0 1285.13 679.052   9
  -6   6   0 566.435 637.066   4
   6   6   0 1264.33 587.241   7
   7   6   0 120699. 2932.94  11
   7   6   0 125650. 2702.97   9
   8   6   0 22397.2 1343.23   7
   8   6   0 26058.6 1437.97  11
   8   6   0 23225.7 1245.45   9
  -8   6   0 27093.7 1419.91   4
   9   6   0 63309.9 1876.46   9
  -9   6   0 71946.6 2213.37   4
   9   6   0 69465.2 2157.56  11
   9   6   0 67770.5 2095.66   7
 -10   6   0 46220.4 1839.47   4
  10   6   0 45253.7 1660.29  11
 -11   6   0 22015.2 1360.01   4
  11   6   0 20008.8 1042.68   9
 -12   6   0 47486.2 1773.24   4
 -13   6   0 521.826 674.943   4
 -14   6   0 56773.8 1574.50   4
 -15   6   0 23348.4 933.546   4
   0   7   0-303.976 1023.34  15
   0   7   0 531.012 758.758   4
   1   7   0 14559.4 1477.98  15
  -1   7   0 14459.5 1512.02  15
   1   7   0 18052.9 1080.59   7
   1   7   0 19776.1 1248.12   4
  -1   7   0 15558.6 1061.19   4
   2   7   0 13541.4 1071.03  11
  -2   7   0 12696.4 931.788   4
  -2   7   0 12088.6 1438.55  15
   2   7   0 12393.9 1315.63  15
   3   7   0 10730.3 1197.27  15
  -3   7   0 10575.2 897.268   4
  -3   7   0 8242.41 1286.33  15
   3   7   0 10065.3 970.280  11
   4   7   0 1797.75 682.600   7
   4   7   0 1423.08 786.535  15
   4   7   0 1946.88 684.537  11
  -4   7   0 1200.63 908.825  15
  -4   7   0 2023.29 633.763   4
  -5   7   0 3537.04 701.797   4
   5   7   0 3532.98 776.172  11
   5   7   0 2894.97 847.117  15
  -5   7   0 2860.51 939.735  15
   5   7   0 3765.51 765.420   7
   6   7   0 4171.20 787.313   7
   6   7   0 5866.33 819.781   9
  -6   7   0 6957.33 1003.61  15
  -6   7   0 5350.86 794.352   4
   6   7   0 4228.10 789.760  11
   7   7   0 887.458 636.215  11
   7   7   0 671.464 579.081   9
  -7   7   0 974.598 625.473   4
  -8   7   0 9737.45 910.021   4
   8   7   0 10385.2 842.072   9
   8   7   0 9574.23 928.408  11
  -9   7   0 914.603 676.554   4
   9   7   0 793.430 521.010  11
  10   7   0 2041.51 501.940  11
 -10   7   0 1784.80 700.512   4
 -11   7   0 1569.48 638.970   4
  11   7   0 1160.52 362.369  11
 -12   7   0 2696.32 594.958   4
 -13   7   0 13844.6 759.716   4
   0   8   0 138289. 2491.30   4
   0   8   0 135580. 3398.49  15
  -1   8   0 7930.86 1130.72  15
   1   8   0 8493.27 1095.02  15
  -2   8   0 65238.7 2328.05  15
  -2   8   0 70391.9 1800.97   4
   2   8   0 68783.6 2278.28  15
  -3   8   0 30991.9 1306.62   4
  -3   8   0 33992.2 1691.74  15
   3   8   0 33972.3 1598.01  15
  -4   8   0 27898.3 1506.37  15
   4   8   0 27312.8 1353.21  15
  -4   8   0 23401.2 1201.42   4
   5   8   0 80807.8 2017.93  15
  -5   8   0 76610.7 1907.18   4
  -6   8   0 1046.22 605.704   4
  -6   8   0 10506.8 1064.13  15
  -7   8   0 85776.6 1936.68   4
  -8   8   0 17545.3 978.761   4
  -9   8   0 44215.6 1335.51   4
 -10   8   0 37363.5 1112.70   4
 -11   8   0 16722.6 698.939   4
   0   9   0 9877.45 971.265  15
   1   9   0 51400.0 1600.76  15
  -1   9   0 52242.1 1661.37  15
  -2   9   0 26612.2 1252.36  15
   2   9   0 22165.8 1102.20  15
  -5   9   0 18916.2 941.050   4
  -6   9   0 23042.7 925.059   4
  20   0  -1 121.900 283.185  14
  19   0  -1-188.588 358.607  14
  18   0  -1 99.4295 407.197  14
  17   0  -1-22.3233 440.550  14
  16   0  -1 124.742 488.229  14
  16   0  -1-62.7326 440.148   2
  15   0  -1-36.1224 485.404  14
  15   0  -1 101.406 489.767   2
  14   0  -1 20.5636 531.447   2
  13   0  -1 63.1055 431.645   1
  12   0  -1 392.338 427.450   1
  11   0  -1 591.631 400.344   1
  10   0  -1 135.626 372.939   1
   9   0  -1 109.203 377.103   1
   8   0  -1 23.7184 399.280   1
   7   0  -1 185.171 466.983   1
  -6   0   1 272.856 736.825   6
   6   0  -1 205.082 726.541   6
   6   0  -1 569.020 569.312   1
  -5   0   1 548.106 684.290   0
   5   0  -1 1066.96 732.992   6
  -5   0   1 1219.43 716.763   6
  -4   0   1 1387.98 738.651   6
   4   0  -1 1991.78 766.231   6
  -3   0   1 914.995 615.479   6
   3   0  -1 886.802 565.399   6
  -2   0   1 430.081 428.048   6
   2   0  -1 433.097 397.630   6
   1   0  -1 111.044 182.194   6
  -1   0   1 83.4722 215.500   6
   0   0  -1 130.836 89.0919   5
   0   0   1 35.0239 85.7130   5
   1   0   1 502.181 131.943   6
  -1   0  -1 1033.06 135.988   6
  -2   0  -1 790.321 259.050   6
   2   0   1 619.772 264.667   6
   3   0   1 389.147 448.154   6
  -3   0  -1 773.392 464.096   6
   4   0   1 817.597 577.848   6
  -4   0  -1 1214.34 657.287   6
  -5   0  -1 325.464 638.853   6
   5   0   1 479.863 618.125   6
  -6   0  -1 340.896 656.411   6
   6   0   1 207.665 683.033   6
   6   0   1 163.128 502.452   1
   7   0   1 595.825 415.149   1
   7   0   1 487.828 633.565   6
   8   0   1 120.104 377.209   1
   9   0   1 247.069 451.445   1
  10   0   1-320.758 413.953   1
  11   0   1-1.89188 426.143   1
  12   0   1 205.774 455.051   1
  13   0   1-77.8664 450.349   1
  14   0   1-62.6202 558.244   2
  15   0   1 53.0536 471.836   2
  16   0   1 32.6464 430.697   2
  17   0   1 6.43118 406.712   2
  17   0   1 345.375 436.632  14
  18   0   1 8.51478 403.620  14
  19   0   1 322.981 350.214  14
  20   0   1-64.1937 279.618  14
  20   1  -1 28115.5 710.971  14
  20  -1  -1 26377.4 740.937  14
  19   1  -1 24097.8 838.417  14
  19  -1  -1 23223.2 870.552  14
  18  -1  -1 53466.0 1427.19  14
  18   1  -1 54595.1 1385.94  14
  17   1  -1 11.6403 434.065  14
  17  -1  -1 250.400 429.744  14
  16  -1  -1 86827.2 2072.91  14
  16   1  -1 91274.9 2032.51  14
  16   1  -1 86648.9 2000.01   2
  15   1  -1 5659.05 696.325  14
  15   1  -1 5719.55 684.364   1
  15   1  -1 5485.69 678.038   2
  14   1  -1 67335.0 1914.43   1
  14  -1  -1 66195.9 1821.56   2
  14   1  -1 62353.6 1820.18   2
  13   1  -1 132371. 2622.49   1
  12   1  -1 52278.9 1621.79   1
  11   1  -1 181911. 2895.83   1
  10   1  -1-6.57081 389.214   1
   9   1  -1 278739. 3400.67   1
   8  -1  -1 104173. 1752.75   1
   8   1  -1 98509.6 1988.10   1
   7  -1  -1 216089. 2392.02   1
   7   1  -1 209290. 2902.83   1
  -6   1   1 359551. 5975.91   0
  -6  -1   1 350056. 5023.85   6
   6  -1  -1 348331. 5257.44   6
  -5  -1   1 43236.8 1700.90   6
  -5   1   1 42978.0 2425.08   0
  -5   1   1 39561.3 1754.57   6
   5  -1  -1 43338.1 1873.35   6
   5   1  -1 42472.0 1575.00   1
  -4  -1   1 222262. 3119.14   6
  -4   1   1 218230. 3559.98   6
   4  -1  -1 226713. 3765.32   6
  -3  -1   1 12215.2 693.988   6
  -3   1   1 11696.1 863.556   6
   3  -1  -1 12449.4 978.790   6
   2  -1  -1 635074. 4737.80   6
  -2   1   1 622598. 4200.14   6
   1  -1  -1 147967. 1792.99   6
  -1   1   1 141854. 1501.85   6
   0  -1  -1 316691. 1790.58   5
   0  -1  -1 331806. 7327.55   6
   0   1   1 328616. 1609.22   6
   1   1   1 571276. 2624.20   5
   1  -1   1 582080. 3322.29   6
  -2   1  -1 103110. 1564.08   6
  -2  -1  -1 101125. 1199.33   6
   3  -1   1 381593. 3446.41   6
  -3  -1  -1 379701. 3316.88   6
  -3   1  -1 389203. 3502.90   6
  -4  -1  -1 1552.54 558.983   6
  -4   1  -1 2012.30 536.441   6
   4   1   1 1899.57 436.623   6
   4  -1   1 2696.02 604.160   6
  -5  -1  -1 284756. 3760.49   6
   5  -1   1 290404. 4061.99   6
  -5   1  -1 295869. 4192.51   6
   5   1   1 288942. 3530.54   6
   6   1   1 362435. 4361.55   6
   6   1   1 365851. 3796.52   1
  -6  -1  -1 360247. 4514.36   6
   6  -1   1 351493. 5052.13   6
   7   1   1 48673.5 1784.66   6
   7   1   1 46201.9 1420.49   1
   7  -1   1 43841.0 1188.74   1
  -7  -1  -1 48327.0 1860.86   6
   8   1   1 378749. 3928.35   1
   8  -1   1 360850. 3418.09   1
   9   1   1 7648.78 699.115   1
  10   1   1 249899. 3417.54   1
  11   1   1 61961.2 1796.33   1
  12   1   1 232595. 3471.78   1
  13   1   1 126190. 2598.97   1
  14  -1   1 29659.6 1285.59   2
  14   1   1 30504.9 1327.98   1
  14   1   1 29267.4 1320.16   2
  15  -1   1 126536. 2431.47   2
  15   1   1 121727. 2383.49  14
  15   1   1 127345. 2568.59   2
  16   1   1 7551.66 726.135   2
  16   1   1 6050.75 675.000  14
  16  -1   1 7278.38 693.805   2
  17   1   1 113861. 2110.17  14
  17   1   1 108618. 2105.58   2
  18  -1   1 20859.2 936.992  14
  18   1   1 20717.4 887.676  14
  19  -1   1 26721.9 910.263  14
  19   1   1 28765.2 871.100  14
  20  -1   1 64387.2 1090.43  14
  19   2  -1 104.715 295.333  14
  19  -2  -1 87.0863 327.738  14
  18   2  -1 3986.09 502.723  14
  18  -2  -1 3691.22 508.095  14
  17  -2  -1 1357.37 487.374  14
  17   2  -1 1419.48 470.596  14
  16   2  -1 51.1083 375.800   2
  16   2  -1 330.488 476.136  14
  15   2  -1 735.887 493.350  14
  15   2  -1 503.963 469.412   1
  15   2  -1 429.388 451.083   2
  14   2  -1 196.116 458.154   2
  14   2  -1 88.5812 481.437  14
  14   2  -1 246.445 436.655   1
  13   2  -1 795.903 546.605   2
  13   2  -1 1258.66 609.501  14
  13   2  -1 951.360 491.860   1
  12   2  -1 7671.83 746.972   1
  11   2  -1 7081.13 707.986   1
  10   2  -1 22000.4 1078.53   1
   9   2  -1 108.779 394.671   1
   8   2  -1 2403.30 503.260   1
  -7   2   1 17572.0 1690.13   0
   7   2  -1 16008.2 906.722   1
  -6   2   1 11142.6 1524.88   0
   6   2  -1 11198.5 808.340   1
  -6  -2   1 12019.4 1061.00   6
   5  -2  -1 92134.7 2837.97   6
  -5  -2   1 88516.4 2144.84   6
   5   2  -1 87660.6 1951.36   1
  -5   2   1 82881.7 3725.68   0
  -4   2   1 4588.84 733.712   6
  -4  -2   1 3873.62 541.620   6
   4  -2  -1 3698.84 845.346   6
  -4   2   1 2836.99 1452.50   0
   4   2  -1 3952.82 797.477   1
   3  -2  -1 83290.4 2147.60   6
  -3   2   1 78269.1 1807.50   6
  -2   2   1 1778.37 410.093   6
   2  -2  -1 1554.59 488.628   6
  -2   2   1-108.480 2180.40   0
   1  -2  -1 266.515 363.356   6
   1  -2  -1 196.611 228.016   5
  -1   2   1 989.564 2144.44   0
   0  -2  -1 15317.5 671.981   6
   0   2   1 15582.6 2699.75   0
   0  -2  -1 15070.6 512.278   5
   1   2   1 202217. 1789.75   5
   1  -2   1 208758. 2594.72   6
   2  -2   1 136061. 2258.90   6
   2   2   1 126618. 1593.92   5
  -3  -2  -1 113897. 1587.12   6
   3   2   1 122390. 3159.60   0
   3  -2   1 117353. 2277.98   6
   3   2   1 126157. 1632.76   7
  -4   2  -1 29922.9 1328.66   6
   4   2   1 26740.3 1104.70   0
  -4  -2  -1 27446.1 1042.11   6
   4  -2   1 27017.0 1275.99   6
  -5  -2  -1 27931.3 1266.19   6
   5   2   1 26522.2 1229.99   1
   6   2   1 975.754 541.287   1
   7   2   1 9854.22 787.157   1
   8   2   1 8850.81 758.143   1
   9   2   1 5484.41 655.985   1
  10   2   1 1050.06 487.440   1
  11   2   1 2979.25 619.866   1
  12   2   1 4249.77 641.384   1
  13   2   1 13069.1 941.200   2
  13   2   1 11896.2 902.586   1
  14   2   1 3955.24 622.267   1
  14   2   1 2845.58 602.696   2
  14   2   1 3151.72 671.714  14
  15   2   1 12671.7 850.757  14
  15   2   1 13858.9 917.660   1
  15   2   1 12291.7 875.323   2
  16   2   1 582.427 450.118   2
  16   2   1 939.341 484.259  14
  17   2   1 3108.25 495.747   2
  17   2   1 2733.18 494.268  14
  18  -2   1 483.211 413.150  14
  19  -2   1 340.576 354.606  14
  19  -3  -1 25056.4 685.567  14
 -19   3   1 21171.9 855.122   4
  18  -3  -1 55537.5 1244.24  14
 -18   3   1 47855.4 1472.94   4
  17  -3  -1 2806.64 488.412  14
  15   3  -1 27568.1 1106.13   2
  14   3  -1 120112. 2308.19   2
  14   3  -1 122940. 2576.88   1
  13   3  -1 40638.2 1506.13   7
  13   3  -1 42927.7 1593.63   1
  13   3  -1 38485.3 1389.19   2
  12   3  -1 13089.0 950.492   1
  12   3  -1 14563.3 960.302   2
  11   3  -1 287840. 3848.20   1
  10   3  -1 8689.65 760.398   1
   9   3  -1 204427. 3109.14   1
   8   3  -1 69127.0 1794.34   1
   7   3  -1 154067. 2574.53   1
   6   3  -1 311350. 3569.40   1
  -6   3   1 308169. 7373.43   0
   5   3  -1 93692.5 1945.40   1
  -5   3   1 97567.9 1436.78   7
  -5   3   1 93301.2 4245.40   0
  -4   3   1 443061. 9198.61   0
  -4   3   1 445135. 2975.35   7
   3  -3  -1 48381.1 1894.88   6
  -3   3   1 45606.9 921.776   7
   3   3  -1 46055.2 1368.01   1
  -2   3   1 442649. 2755.79   7
   2   3  -1 444728. 3238.38   7
   1   3  -1 115697. 1526.05   7
  -1   3   1 113448. 1419.44   7
   0  -3  -1 206011. 2905.23   6
   0   3  -1 201826. 1856.12   7
   0   3   1 199305. 1908.94   7
   0  -3   1 197065. 3013.99   6
   0   3   1 191963. 6426.91   0
  -1  -3  -1 255658. 2994.00   6
   1   3   1 254967. 6604.76   0
  -1   3  -1 257386. 1929.37   7
   1   3   1 250818. 2257.11   7
   1  -3   1 253026. 3525.72   6
   2   3   1 1311.19 1088.16   0
   2   3   1 658.696 379.688   7
   2  -3   1 659.483 488.982   6
  -2  -3  -1 1049.84 397.455   6
   3   3   1 703061. 4360.82   5
   3   3   1 689035. 4285.78   7
   4   3   1 59850.5 1544.28   1
   4   3   1 66242.2 1497.95   7
   5   3   1 270258. 3608.27   1
   5   3   1 250389. 3049.26   7
   6   3   1 171078. 2760.66   7
   6   3   1 198632. 3139.30   1
   7   3   1 168074. 2893.94   1
   7   3   1 151098. 2764.90   7
   8   3   1 220691. 3448.90   7
   8   3   1 221688. 3377.16   1
   9   3   1 5340.79 693.142   1
   9   3   1 5028.13 714.695   7
  10   3   1 252471. 3727.54   1
  10   3   1 260321. 3693.41   7
  11   3   1 69591.6 1904.30   7
  11   3   1 66353.4 1974.13   1
  12   3   1 62651.5 1807.02   7
  12   3   1 58174.8 1854.29   1
  12   3   1 64729.5 1858.14   9
  12   3   1 60866.9 1764.75   2
  13   3   1 119174. 2395.85   9
  13   3   1 116524. 2385.28   2
  14   3   1 5364.39 663.742   2
  14   3   1 5312.59 675.981   1
  15   3   1 139180. 2451.56   2
  16   3   1 1062.10 430.238   2
  17   3   1 56741.2 1359.48   2
  18  -3   1 37313.9 1051.59  14
 -18   3  -1 30772.6 1226.72   4
 -19   3  -1 17535.2 786.199   4
  19  -3   1 22595.2 675.736  14
 -18   4   1 2885.39 544.184   4
 -17   4   1 8063.56 801.510   4
 -16   4   1 781.157 706.667   4
  16  -4  -1 365.539 397.581  14
 -15   4   1 4354.38 891.420   4
 -14   4   1 8577.76 1108.25   4
  14   4  -1 9376.40 693.762   2
  13   4  -1 1657.17 552.501   1
  13   4  -1 1799.81 568.193   7
  12   4  -1 3581.46 656.740   1
  12   4  -1 3039.69 641.883   7
  11   4  -1 584.361 546.832   9
  11   4  -1-228.686 487.369   1
  11   4  -1 54.1919 516.570   7
  10   4  -1 9852.39 897.705   7
  10   4  -1 9028.62 833.978   1
   9   4  -1 7364.37 830.811   7
   9   4  -1 7501.90 737.702   1
   8   4  -1 22577.1 1240.24   7
   8   4  -1 22598.6 1123.80   1
   7   4  -1 9457.98 869.301   7
   7   4  -1 8501.32 742.441   1
   6   4  -1 8366.34 787.035   7
   6   4  -1 9263.11 789.507   1
   5   4  -1 24153.0 1112.80   7
   5   4  -1 27704.6 1170.38   1
   4   4  -1 509.637 449.075   7
  -4   4   1 75.2521 1387.73   0
  -4   4   1 259.709 300.636   7
  -3   4   1 15441.9 672.562   7
   3   4  -1 14917.3 806.148   7
  -2   4   1 3216.31 1478.50   0
   2   4  -1 3891.23 491.959   7
  -2   4   1 3989.99 430.586   7
   1   4  -1 2309.93 419.701   7
  -1   4   1 1194.24 1423.45   0
  -1   4   1 2578.51 396.919   7
   0   4   1 5050.75 471.830   7
   0   4  -1 5544.65 451.388   7
   0   4   1 5250.68 1479.85   0
  -1   4  -1 1152.71 330.628   7
   1   4   1 1475.65 401.492   7
   1   4   1 1786.56 1149.28   0
  -2   4  -1 59410.7 1122.93   7
   2   4   1 54621.3 1353.74   7
   3   4   1 4675.42 547.389   7
   4   4   1 10799.3 769.580   7
   5   4   1 43345.8 1487.35   1
   5   4   1 41086.2 1412.62   7
   6   4   1 10285.5 913.966   1
   6   4   1 9620.66 845.772   7
   7   4   1 20421.1 1168.93   7
   7   4   1 22859.0 1243.72   1
   8   4   1 495.446 541.580   1
   8   4   1 614.667 553.224   7
   9   4   1 11405.3 941.179   1
   9   4   1 11327.8 967.518   7
  10   4   1 4336.19 709.373   7
  10   4   1 5228.24 737.707   1
  11   4   1 12017.1 942.178   7
  11   4   1 12726.6 970.079   1
  11   4   1 12515.4 1000.65   9
  12   4   1 2464.74 576.589   7
  12   4   1 1724.27 551.118   9
  12   4   1 1814.32 573.858   1
  13   4   1 135.946 489.246   9
  13   4   1 357.109 515.054   1
  13   4   1 148.491 449.057   2
  14   4   1 3087.01 527.055   2
 -15   4  -1 418.866 774.149   4
  15   4   1 377.850 383.743   2
  16   4   1 3266.05 438.811   2
 -16   4  -1 3430.68 806.750   4
 -17   4  -1 3338.34 691.389   4
  17  -4   1 3795.69 471.959  14
  18  -4   1 1691.03 319.337  14
 -18   4  -1 1229.70 478.283   4
 -17   5   1 1180.31 438.115   4
 -16   5   1 51324.9 1455.86   4
 -15   5   1 5912.80 838.010   4
 -14   5   1 46549.6 1779.45   4
 -13   5   1 31572.2 1597.80   4
 -12   5   1 28256.2 1636.69   4
  12   5  -1 30698.0 1288.54   1
  12   5  -1 31355.5 1342.73   7
  11   5  -1 84046.7 2203.62   7
  11   5  -1 78133.1 2039.89   9
  11   5  -1 79952.6 2062.91   1
 -11   5   1 86322.3 2727.30   4
  10   5  -1 1175.44 574.825   7
  10   5  -1-140.373 498.351   1
 -10   5   1 1391.87 826.436   4
  10   5  -1 1137.19 569.059   9
  -9   5   1 203555. 3724.82   4
   9   5  -1 161735. 3181.22   7
   9   5  -1 169815. 3075.81   9
   9   5  -1 191178. 3229.38   1
   8   5  -1 36875.1 1600.53   7
   7   5  -1 118087. 2703.10   7
   6   5  -1 159781. 3020.05   7
   5   5  -1 24997.4 1219.67   7
   4   5  -1 362031. 4140.57   7
   3   5  -1 1683.12 514.498   7
  -3   5   1 1179.59 386.101   7
  -2   5   1 219242. 2675.36   7
   2   5  -1 211402. 2859.78   7
  -1   5   1 36808.0 1164.45   7
   1   5  -1 35972.6 1159.29   7
   0   5  -1 133596. 2077.78   7
   0   5   1 128245. 2163.61   7
   1   5   1 116209. 2117.63   7
  -1   5  -1 125266. 1949.96   7
   2   5   1 17726.7 933.890   7
   3   5   1 326759. 3804.17   7
   4   5   1 16894.6 1004.79   7
   5   5   1 117046. 2529.27   7
   6   5   1 137301. 2843.64   7
   7   5   1 54736.7 1897.10   7
   8   5   1 199926. 3638.74   7
  -9   5  -1 1728.33 875.771   4
   9   5   1 2454.36 652.874   7
   9   5   1 1052.08 638.474   9
   9   5   1 1077.35 550.991   1
  10   5   1 138395. 2793.92   9
  10   5   1 145887. 2984.55   7
 -11   5  -1 41506.0 2004.83   4
  11   5   1 42330.1 1581.98   7
  11   5   1 39732.3 1542.91   9
  11   5   1 41181.2 1518.15   1
  12   5   1 78414.0 2009.63   9
 -12   5  -1 86348.6 2578.72   4
  12   5   1 84234.6 2053.22   1
 -13   5  -1 63404.5 2169.00   4
 -14   5  -1 19881.1 1282.67   4
 -15   5  -1 93453.8 2179.55   4
 -16   5  -1 1262.49 571.098   4
 -17   5  -1 45017.4 1078.71   4
 -15   6   1 5707.78 613.677   4
 -14   6   1 406.257 576.520   4
 -13   6   1 2773.66 732.156   4
 -12   6   1 164.743 678.413   4
 -11   6   1 405.094 742.359   4
 -10   6   1 5448.57 928.717   4
  10   6  -1 5057.63 672.667   9
  10   6  -1 5510.57 724.669  11
   9   6  -1 726.244 531.402   9
   9   6  -1 618.053 571.001   7
   9   6  -1 1268.44 615.505  11
  -9   6   1 724.017 722.034   4
   8   6  -1 25638.8 1283.08   9
   8   6  -1 27728.2 1429.01   7
   8   6  -1 26690.9 1470.32  11
  -8   6   1 26363.0 1421.97   4
   7   6  -1 18734.5 1278.30  11
   7   6  -1 17836.7 1180.14   7
  -7   6   1 21663.8 1249.54   4
  -6   6   1 3294.47 1179.21  13
   6   6  -1 3436.01 683.343   7
   6   6  -1 3804.25 776.245   9
   6   6  -1 3981.37 818.209  11
  -6   6   1 4983.29 796.064   4
  -5   6   1 34549.1 1902.30  15
   5   6  -1 33699.5 1571.93  11
   5   6  -1 35242.4 1679.03  15
  -5   6   1 38159.1 1428.97   4
   5   6  -1 32807.0 1448.85   7
   4   6  -1 333.518 503.533   7
   3   6  -1 12470.0 901.342   7
  -2   6   1 2244.86 521.913   7
   2   6  -1 1945.70 534.354   7
   1   6  -1 9500.97 778.487   7
  -1   6   1 9442.13 765.554   7
   0   6   1 8352.46 765.471   7
   0   6  -1 8743.44 735.908   7
   1   6   1 207.106 507.870   7
   2   6   1 10444.8 874.561   7
   3   6   1 247.219 521.305   7
   4   6   1 13500.1 1002.29   7
   4   6   1 14352.2 1120.52  11
  -5   6  -1 1854.19 1010.10  15
   5   6   1 1886.94 679.193  11
   5   6   1 1850.52 618.656   7
  -5   6  -1 4271.92 721.603   4
   5   6   1 2186.71 860.059  15
   5   6   1 3007.76 838.568   9
   6   6   1 1232.61 647.087   9
  -6   6  -1 1899.03 670.964   4
   6   6   1 1499.11 586.866   7
   6   6   1 1146.60 611.246  11
   7   6   1 11389.4 989.663   9
  -7   6  -1 12732.8 1054.42   4
   7   6   1 12091.2 1075.69  11
   7   6   1 10922.2 993.260   7
   8   6   1 3288.54 700.570  11
   8   6   1 3257.67 686.292   9
  -8   6  -1 3425.08 810.639   4
   8   6   1 3482.54 749.642   7
   9   6   1 16996.8 1147.53   7
  -9   6  -1 17861.7 1248.17   4
   9   6   1 17548.4 1175.64  11
   9   6   1 16937.1 1076.02   9
  10   6   1 260.481 502.798  11
 -10   6  -1 708.564 772.072   4
  10   6   1 50.9493 508.332   9
 -11   6  -1 2614.29 817.375   4
  11   6   1 2458.83 534.909  11
  11   6   1 2463.18 578.422   9
  12   6   1 12769.2 814.477  11
 -12   6  -1 11062.7 1011.49   4
 -13   6  -1 2557.36 701.849   4
 -14   6  -1 6209.40 730.382   4
 -15   6  -1 57.6166 471.017   4
 -13   7   1 29188.9 1008.35   4
 -12   7   1 7541.19 733.353   4
 -11   7   1 61546.8 1720.65   4
  10   7  -1-153.896 389.587  11
 -10   7   1 149.029 632.924   4
  -9   7   1 83751.3 2152.53   4
   9   7  -1 95647.7 2169.95  11
  -8   7   1 33775.8 1438.48   4
   8   7  -1 34273.2 1475.05  11
  -7   7   1 66928.7 1928.82   4
   7   7  -1 68401.7 2149.52  11
   6   7  -1 89255.4 2332.63   7
  -6   7   1 85972.3 2158.31   4
   6   7  -1 89489.6 2493.67  11
   5   7  -1 8890.23 941.624  11
  -5   7   1 9287.14 876.316   4
   5   7  -1 8942.18 905.119   7
  -5   7   1 8984.67 1179.32  15
   5   7  -1 9344.25 1040.62  15
   4   7  -1 75067.6 2382.40  15
  -4   7   1 78423.2 2720.74  15
  -4   7   1 78870.8 2022.64   4
   4   7  -1 70859.1 2225.50  11
  -3   7   1 10546.1 1414.56  15
   3   7  -1 11506.8 1197.69  15
  -3   7   1 12814.6 948.966   4
   3   7  -1 8197.25 830.081   7
  -2   7   1 85247.2 3055.54  15
   2   7  -1 80771.4 2731.16  15
  -2   7   1 82140.5 2030.95   4
  -1   7   1 33909.7 1414.58   4
   1   7  -1 33259.3 1941.49  15
  -1   7   1 33415.3 2080.79  15
   0   7   1 25696.2 1332.49   4
   0   7   1 23732.3 1870.19  15
   0   7  -1 27026.7 1888.86  15
   0   7   1 28604.6 1294.24   7
   1   7   1 111724. 2361.38   4
  -1   7  -1 115913. 2372.70   4
   1   7   1 116961. 3458.62  15
   2   7   1 5697.75 1140.60  15
   2   7   1 4726.05 759.784  11
   2   7   1 4521.91 728.604   7
  -2   7  -1 5614.82 769.143   4
  -2   7  -1 4072.82 1091.88  15
  -3   7  -1 81338.3 2776.78  15
   3   7   1 86232.3 2280.00   7
   3   7   1 82077.4 2723.94  15
   3   7   1 78216.1 2305.49  11
  -3   7  -1 85794.3 2043.94   4
   4   7   1 18615.8 1227.57  11
   4   7   1 20059.3 1417.13  15
   4   7   1 20022.1 1256.60   7
  -4   7  -1 20678.4 1141.07   4
  -4   7  -1 21866.4 1530.48  15
  -5   7  -1 80555.4 2036.95   4
   5   7   1 69041.3 2212.97  11
   5   7   1 75282.8 2351.59  15
   5   7   1 71790.3 2186.05   7
  -5   7  -1 76881.7 2422.83  15
   6   7   1 80048.2 2366.58  11
   6   7   1 82486.9 2333.50   7
  -6   7  -1 86096.4 2142.05   4
  -6   7  -1 92438.7 2461.64  15
   6   7   1 89509.3 2243.08   9
   7   7   1 4576.04 712.916   9
  -7   7  -1 6737.45 817.378   4
   7   7   1 5543.81 807.715  11
   8   7   1 92188.9 2108.60   9
  -8   7  -1 96371.9 2266.23   4
   8   7   1 94712.8 2428.60  11
  -9   7  -1 2895.72 710.021   4
   9   7   1 4088.71 659.752  11
   9   7   1 3392.01 567.832   9
 -10   7  -1 48760.8 1636.42   4
  10   7   1 54090.1 1569.02  11
  11   7   1 3629.88 507.727  11
 -11   7  -1 2267.82 632.264   4
 -12   7  -1 36030.7 1215.57   4
  12   7   1 38026.2 1008.51  11
 -13   7  -1 21148.5 850.046   4
 -11   8   1 2906.51 468.304   4
 -10   8   1 33617.8 1089.92   4
  -9   8   1 2945.61 599.366   4
  -8   8   1 43238.2 1418.54   4
  -7   8   1 12549.4 899.967   4
  -6   8   1 6278.03 758.248   4
  -6   8   1 11181.1 1064.46  15
   5   8  -1 44811.0 1559.92  15
  -5   8   1 42062.1 1468.84   4
  -5   8   1 46766.3 1725.36  15
  -4   8   1 118.031 693.867   4
  -4   8   1 1476.00 825.690  15
   3   8  -1 31948.1 1567.24  15
  -3   8   1 30065.2 1664.53  15
  -3   8   1 29986.1 1294.23   4
  -2   8   1 6685.34 898.647   4
   2   8  -1 6959.71 1023.09  15
   1   8  -1 19984.7 1452.62  15
  -1   8   1 16094.2 1411.68  15
   0   8  -1 39978.1 1518.03   4
   0   8   1 38023.0 1418.29   4
   0   8  -1 24467.4 1590.62  15
   0   8   1 23915.5 1613.58  15
  -1   8  -1 6840.15 1116.22  15
   1   8   1 1008.09 879.551  15
  -2   8  -1 28881.7 1630.04  15
  -2   8  -1 31129.3 1280.58   4
   2   8   1 26440.2 1529.68  15
  -3   8  -1 3666.22 797.443   4
   3   8   1 2116.68 786.504  15
   4   8   1 22286.8 1251.22  15
  -4   8  -1 20780.9 1161.15   4
   5   8   1 14907.1 984.538  15
  -5   8  -1 10479.1 957.174   4
  -6   8  -1 12043.0 874.360   4
  -7   8  -1 24268.6 1116.47   4
  -8   8  -1 661.119 544.896   4
  -9   8  -1 12953.8 821.814   4
 -10   8  -1 767.467 473.055   4
  -6   9   1 52963.4 1228.02   4
  -5   9   1 18364.9 926.062   4
  -4   9   1 78944.8 1552.17   4
  -3   9   1 11435.4 931.581  15
  -2   9   1 69263.1 1838.43  15
  -1   9   1 47697.6 1606.47  15
   0   9   1 49192.7 1642.80  15
   1   9   1 58835.1 1684.12  15
   2   9   1 13207.8 921.748  15
   3   9   1 79996.8 1712.58  15
  20   0  -2 48814.0 983.722  14
  19   0  -2 5062.51 495.137  14
  18   0  -2 58222.6 1470.50  14
  17   0  -2 36934.0 1312.65  14
  16   0  -2 62720.0 1735.96  14
  15   0  -2 208575. 3203.30   2
  15   0  -2 204471. 3149.59  14
  14   0  -2 1793.99 561.081  14
  14   0  -2 2305.32 585.594   2
  13   0  -2 369014. 4117.74   1
  12   0  -2 86320.1 1977.56   1
  11   0  -2 259673. 3330.16   1
  10   0  -2 187471. 2794.94   1
   9   0  -2 17176.0 929.453   1
   8   0  -2 322588. 3848.71   1
   7   0  -2 12436.5 1055.94   1
  -6   0   2 475651. 6234.63   6
   6   0  -2 485944. 6047.02   6
  -5   0   2 17678.4 1339.87   6
   5   0  -2 15837.1 1267.40   6
  -5   0   2 15340.7 963.469   8
   4   0  -2 276149. 3925.15   6
  -4   0   2 307789. 4282.19   6
  -3   0   2 442727. 4456.05   6
   3   0  -2 413237. 4159.51   6
   2   0  -2 1811.98 411.507   6
  -2   0   2 1898.95 507.655   6
  -1   0   2 729373. 3579.42   6
   0   0  -2 19888.6 501.290   5
   0   0   2 21177.7 523.019   5
   1   0   2 532711. 2762.68   5
   2   0   2 319163. 2143.14   6
  -3   0  -2 225573. 2267.01   6
   3   0   2 211214. 2220.29   6
  -4   0  -2 496521. 4239.84   6
   4   0   2 472199. 4125.21   6
  -5   0  -2 150127. 2882.32   6
   5   0   2 156079. 2877.70   6
   6   0   2 564736. 5812.94   6
  -6   0  -2 540716. 6337.14   6
  -7   0  -2 22823.7 1517.66   6
   7   0   2 25258.2 1465.21   6
   7   0   2 22604.2 1089.82   1
   8   0   2 284591. 3463.37   1
   9   0   2 316650. 3710.04   1
  10   0   2 147665. 2592.79   1
  11   0   2 352954. 4041.96   1
  12   0   2 2002.27 531.449   1
  13   0   2 181251. 2974.78   1
  14   0   2 60503.3 1829.96   2
  15   0   2 62194.7 1809.67   2
  16   0   2 40790.4 1421.91   2
  17   0   2 3683.42 533.811   2
  17   0   2 3779.29 570.822  14
  18   0   2 159776. 2354.97  14
  19   0   2 1923.36 422.378  14
  20   0   2 68592.4 1054.03  14
  20  -1  -2 1330.39 310.396  14
  20   1  -2 1376.66 303.635  14
  19   1  -2 2762.20 419.189  14
  19  -1  -2 2003.28 418.924  14
  18   1  -2 154.260 416.348  14
  18  -1  -2 262.059 380.892  14
  17   1  -2 162.439 413.043  14
  17  -1  -2 291.817 451.942  14
  16  -1  -2 782.740 475.797  14
  16   1  -2 358.842 479.189  14
  15   1  -2 139.864 480.139  14
  15  -1  -2 372.002 533.547  14
  15   1  -2 785.172 456.813   2
  15   1  -2 618.175 508.582   1
  14   1  -2 1498.35 541.760  14
  14   1  -2 1757.71 539.802   1
  14   1  -2 1835.26 558.992   2
  13   1  -2-149.477 491.700   1
  12   1  -2 1334.08 458.690   1
  11   1  -2 6519.12 664.154   1
  10   1  -2 3889.30 566.689   1
   9   1  -2 682.166 484.358   1
   8   1  -2 4183.37 643.366   1
   8  -1  -2 4697.21 570.610   1
   7  -1  -2 31256.9 1209.59   1
  -7   1   2 30427.6 2123.22   0
   7   1  -2 30371.3 1449.89   1
  -6   1   2 1553.79 1268.61   0
  -6  -1   2 540.487 707.273   6
   6   1  -2 917.505 1079.58   1
  -6  -1   2 225.484 621.313   8
   5  -1  -2 1701.12 758.925   6
  -5  -1   2 2015.21 704.434   6
   5   1  -2 1572.53 787.857   1
  -5   1   2 2081.09 864.861   6
  -4  -1   2 46202.9 1500.74   6
   4  -1  -2 44605.4 1901.81   6
  -4   1   2 42419.2 1752.44   6
  -3  -1   2 34159.9 1111.76   6
   3  -1  -2 34846.1 1626.66   6
  -3   1   2 35709.8 1508.24   6
  -2   1   2 6105.53 739.814   6
   2  -1  -2 5493.69 877.131   6
   1  -1  -2 28282.2 1088.10   6
  -1   1   2 32884.1 955.940   6
   0  -1  -2 1273.44 272.712   6
   0  -1   2 1195.65 151.120   5
   0   1   2 1064.40 197.166   6
   0  -1  -2 953.625 254.071   5
   0   1   2 887.227 274.387   5
   1   1   2 4747.31 388.462   5
   2  -1   2 47022.3 1138.98   6
  -3  -1  -2 4045.46 398.073   6
  -3   1  -2 3506.81 505.374   6
   3  -1   2 3688.60 516.682   6
   3   1   2 3577.15 326.257   6
   4   1   2 175903. 2244.86   6
  -4   1  -2 177188. 2735.98   6
   4  -1   2 169190. 2620.05   6
   5   1   2 655.790 459.662   6
  -5  -1  -2 1102.28 623.060   6
   5   1   2 637.607 722.440   1
  -5   1  -2 969.359 606.468   6
   5  -1   2 594.651 574.686   6
   6  -1   2 15404.2 1157.82   6
  -6  -1  -2 12149.7 1033.10   6
   6   1   2 12624.5 1121.10   1
   6   1   2 16616.5 998.175   6
   7   1   2 22712.7 1230.18   6
   7  -1   2 19845.9 872.418   1
   7   1   2 19872.5 1163.06   1
   8  -1   2 11400.8 727.967   1
   8   1   2 12649.8 933.068   1
   9  -1   2 118.564 377.139   1
   9   1   2 603.917 491.623   1
  10   1   2 7146.63 735.328   1
  11   1   2 5062.87 666.176   1
  12   1   2 2890.51 568.167   1
  13   1   2 3799.65 632.220   1
  14   1   2 8924.44 797.579   1
  14   1   2 8421.45 811.110   2
  14  -1   2 8663.27 851.760   2
  15   1   2 9786.33 856.185   2
  15   1   2 10064.9 802.135   1
  15  -1   2 9627.10 774.873   2
  16   1   2-143.729 451.911  14
  16   1   2 13.9329 445.039   2
  16  -1   2-33.1130 418.683   2
  17   1   2 368.146 398.551   2
  17   1   2 385.899 455.912  14
  17  -1   2 341.397 366.070   2
  18  -1   2 2769.00 493.806  14
  18   1   2 2919.34 455.673   2
  18   1   2 3064.96 483.508  14
  19   1   2 460.460 349.454  14
  19  -1   2 421.580 368.855  14
  20  -1   2 1790.34 310.542  14
  19  -2  -2 2264.61 392.331  14
 -19   2   2 1652.48 538.869   4
  19   2  -2 2345.40 390.899  14
  18   2  -2 50984.4 1237.03  14
  18  -2  -2 49113.1 1303.51  14
  17  -2  -2 41371.0 1335.42  14
  17   2  -2 41748.2 1252.87  14
  16  -2  -2 24403.5 1133.56  14
  16   2  -2 22098.1 1023.00  14
  15   2  -2 94842.5 2099.76   2
  15   2  -2 98579.4 2120.64  14
  14   2  -2 1392.77 557.381  14
  14   2  -2 727.380 486.280   1
  14   2  -2 548.481 449.104   2
  13   2  -2 186865. 3000.37   2
  13   2  -2 173921. 3021.57   1
  12   2  -2 36680.0 1420.86   1
  11   2  -2 118523. 2445.86   1
  10   2  -2 125906. 2475.61   1
   9   2  -2 40267.5 1422.09   1
  -8   2   2 345099. 7040.98   0
   8   2  -2 300379. 3780.57   1
  -7   2   2 10780.4 1639.34   0
   7   2  -2 10375.1 893.010   1
  -6  -2   2 187711. 2382.44   8
  -6   2   2 184443. 5860.21   0
   6   2  -2 176205. 3200.90   1
  -5  -2   2 145751. 2811.85   6
  -5   2   2 155022. 6064.77   0
  -4   2   2 206636. 3408.88   6
  -4   2   2 207955. 1885.55   7
   4   2  -2 196482. 3484.58   1
   4  -2  -2 205592. 4132.84   6
  -4  -2   2 199451. 2925.46   6
   3  -2  -2 331567. 4885.83   6
  -3   2   2 326715. 3751.10   6
   2  -2  -2 32118.3 1436.73   6
  -2   2   2 28991.7 1012.39   6
  -1   2   2 413145. 2983.12   6
   1  -2  -2 417733. 4213.40   6
   1  -2  -2 412702. 3009.35   5
   0  -2  -2 540643. 3388.49   5
   0  -2  -2 564542. 4066.77   6
   1   2   2 398148. 2963.44   5
   1  -2   2 417408. 3851.58   6
   2   2   2 89635.9 1549.63   5
   2  -2   2 90782.6 1902.62   6
  -2  -2  -2 88526.9 908.363   6
   3  -2   2 16106.2 973.806   6
   3   2   2 16460.5 817.692   5
  -3  -2  -2 15148.6 580.346   6
   3   2   2 17841.4 668.676   7
   4  -2   2 590557. 5594.08   6
  -4  -2  -2 577011. 4040.46   6
   5   2   2 3013.84 770.985   1
   5   2   2 3988.04 566.913   7
   6   2   2 392060. 4908.13   1
   6   2   2 352887. 3602.43   7
   7   2   2 25189.6 1277.86   1
   8   2   2 140209. 2768.69   1
   9   2   2 152897. 2877.63   1
   9   2   2 164812. 2778.35   7
  10   2   2 40047.6 1521.31   1
  10   2   2 29073.9 1224.15   7
  11   2   2 169294. 3064.57   1
  12   2   2 8322.88 808.553   1
  13   2   2 85392.9 2207.89   1
  13   2   2 83909.5 2146.27   2
  14   2   2 34439.3 1402.84   1
  14   2   2 33130.1 1382.01   2
  15   2   2 48940.7 1590.51   1
  15   2   2 44296.2 1522.42   2
  16   2   2 57399.3 1642.87   2
  17   2   2 6322.99 612.108   2
  18   2   2 64260.8 1412.29   2
  18  -2   2 66315.0 1514.50  14
  19  -2   2 801.131 345.860  14
 -19   3   2 2054.27 464.945   4
  18  -3  -2 119.740 344.719  14
 -18   3   2 281.449 540.169   4
  17  -3  -2 1061.75 442.802  14
  16  -3  -2 4431.88 611.236  14
  16   3  -2 4676.22 597.212  14
  15   3  -2 1017.88 497.946  14
  14   3  -2 292.769 466.700   1
  14   3  -2 325.388 527.005  14
  14   3  -2 337.636 527.274   7
  14   3  -2 175.570 411.809   2
  13   3  -2 2722.66 518.613   2
  13   3  -2 3969.20 712.695  14
  13   3  -2 3622.98 631.041   1
  12   3  -2 33063.0 1378.13   1
  12   3  -2 35035.6 1341.93   2
  11   3  -2 1141.63 441.383   1
  10   3  -2 915.329 479.115   1
   9   3  -2 352.893 453.564   1
   8   3  -2 7176.46 721.106   1
   7   3  -2 5556.38 681.728   1
  -7   3   2 4443.24 1271.08   0
  -6   3   2 458.106 1259.26   0
   6   3  -2 918.039 541.496   1
   5   3  -2 8687.53 823.102   1
  -5   3   2 9885.52 1882.07   0
  -5   3   2 10006.3 565.402   7
  -4   3   2 12014.7 577.087   7
   4   3  -2 11575.4 922.242   1
  -4   3   2 11750.1 2179.18   0
  -3   3   2 11860.9 840.810   6
  -3   3   2 11985.0 557.470   7
   3  -3  -2 11115.2 1131.91   6
  -3   3   2 8785.89 2319.31   0
   3   3  -2 12286.8 1097.57   1
  -2   3   2 18599.9 657.687   7
   2  -3  -2 18948.8 815.556   5
   1  -3  -2 23270.9 1286.85   6
  -1   3   2 22739.5 722.562   7
   1  -3  -2 22347.8 846.480   5
   1   3  -2 23941.4 772.144   7
  -1   3   2 23784.9 3612.91   0
   0  -3   2 2584.31 497.157   6
   0  -3  -2 3978.26 649.537   6
   0   3  -2 3175.82 360.817   7
   0   3   2 2691.37 371.242   7
   0  -3  -2 3185.65 406.784   5
   1   3   2 493.132 338.307   7
   1  -3   2 557.344 498.971   6
   1   3   2 1737.57 2009.86   0
   2   3   2 31189.9 2855.71   0
   2   3   2 29473.9 894.902   7
   3   3   2 4470.16 544.074   5
   3   3   2 4253.87 475.597   1
   3   3   2 4436.88 1270.74   0
   3   3   2 4274.95 499.165   7
   4   3   2 9687.16 742.878   5
   4   3   2 7995.05 669.725   1
   4   3   2 9091.98 657.453   7
   5   3   2 40114.9 1449.24   1
   5   3   2 38612.2 1274.32   7
   6   3   2 717.028 600.743   1
   6   3   2 516.980 512.898   7
   7   3   2 5833.24 798.977   1
   7   3   2 5618.47 740.675   7
   8   3   2 2595.65 647.795   1
   8   3   2 2400.15 664.325   7
   9   3   2 16152.3 1060.98   1
   9   3   2 17676.5 1079.29   7
  10   3   2 7315.57 782.974   7
  10   3   2 5748.73 736.129   1
  11   3   2 877.459 515.869   1
  11   3   2 1130.38 512.745   7
  12   3   2 304.574 615.044   9
  12   3   2 51.6865 485.630   1
  13   3   2 325.897 454.159   2
  13   3   2 176.239 524.118   9
  13   3   2 361.809 471.531   1
  14   3   2 4578.78 646.926   2
  14   3   2 4633.50 666.516   1
  15   3   2 27.6626 449.242   2
  16   3   2 663.752 402.205   2
  17   3   2 9362.44 626.547   2
 -18   3  -2 514.866 559.655   4
  18  -3   2 21.7615 351.096  14
  19  -3   2 237.104 268.148  14
 -19   3  -2-111.466 411.465   4
 -18   4   2 45519.6 1153.63   4
 -17   4   2 33971.4 1262.60   4
 -16   4   2 31468.2 1415.16   4
 -15   4   2 69694.7 2172.20   4
 -14   4   2 480.357 824.892   4
  13   4  -2 91914.4 2189.27   7
  13   4  -2 91947.9 2248.83   1
  12   4  -2 7905.48 800.310   7
  12   4  -2 7744.43 802.585   1
  11   4  -2 60573.6 1887.41   7
  11   4  -2 56014.0 1753.86   1
  10   4  -2 150047. 2796.10   1
   9   4  -2 47492.8 1587.07   1
   8   4  -2 228967. 3351.63   1
   7   4  -2 1345.78 501.714   1
  -6   4   2 280556. 8039.09   0
   6   4  -2 269249. 3472.02   1
  -5   4   2 136130. 2019.94   7
  -5   4   2 140181. 5846.01   0
   5   4  -2 138501. 2458.56   1
   4   4  -2 233237. 3105.09   7
  -4   4   2 232917. 7636.12   0
  -4   4   2 244488. 2596.96   7
   3   4  -2 371385. 3594.19   7
  -3   4   2 388255. 3219.32   7
  -2   4   2 9484.03 2061.97   0
   2   4  -2 8194.62 604.930   7
  -2   4   2 8463.28 559.793   7
   1   4  -2 335444. 2974.62   7
  -1   4   2 326840. 9478.12   0
   0   4   2 9723.79 621.238   7
   0   4   2 9322.32 2023.39   0
   0   4  -2 9953.67 551.954   7
   1   4   2 143271. 2085.82   7
   1   4   2 145402. 5626.00   0
   2   4   2 287515. 7077.61   0
   2   4   2 281018. 3022.95   7
   3   4   2 69873.6 1619.72   7
   4   4   2 170830. 2638.67   7
   5   4   2 2636.01 548.473   7
   5   4   2 1187.37 498.435   1
   6   4   2 269630. 3750.38   7
   6   4   2 295676. 3955.30   1
   7   4   2 51121.0 1856.71   1
   7   4   2 44732.8 1683.55   7
   8   4   2 202811. 3555.50   1
   8   4   2 191458. 3507.09   7
   9   4   2 167701. 3212.91   1
   9   4   2 175531. 3311.01   7
  10   4   2 21069.4 1204.52   7
  10   4   2 19739.9 1188.43   1
  11   4   2 139970. 2860.71   1
  11   4   2 134638. 2766.68   9
  11   4   2 140739. 2824.14   7
  12   4   2 4517.11 698.961   9
  12   4   2 5593.90 705.260   7
  12   4   2 5506.57 689.107   2
  12   4   2 4518.32 660.532   1
  13   4   2 140401. 2647.82   9
  13   4   2 143534. 2723.44   1
  14   4   2 30550.9 1162.39   2
  15   4   2 44814.7 1279.66   2
 -15   4  -2 41078.6 1736.15   4
 -16   4  -2 59438.8 1863.22   4
  16   4   2 65769.7 1384.08   2
 -17   4  -2 7919.85 788.485   4
  18  -4   2 33676.8 780.923  14
 -18   4  -2 29275.5 927.525   4
 -17   5   2 2010.70 454.950   4
 -16   5   2 8136.36 743.637   4
 -15   5   2 512.858 642.803   4
 -14   5   2 5962.08 906.241   4
 -13   5   2 766.729 772.884   4
 -12   5   2 3661.86 895.945   4
  11   5  -2 267.071 560.338   1
 -11   5   2-31.1721 834.565   4
  11   5  -2 459.042 524.768   7
  10   5  -2 22349.0 1167.93   9
  10   5  -2 23013.6 1250.79   7
   9   5  -2 13386.0 969.092   1
   9   5  -2 12732.9 992.953   9
  -9   5   2 14041.0 1264.87   4
   9   5  -2 13304.4 1038.93   7
  -8   5   2 137.695 685.953   4
   8   5  -2-66.9555 555.846   7
   7   5  -2 48557.6 1768.97   7
   6   5  -2 4390.03 703.622   7
   5   5  -2 53453.8 1714.73   7
  -4   5   2 1335.69 423.725   7
   4   5  -2 1183.69 495.060   7
  -3   5   2 22569.0 938.272   7
   3   5  -2 21682.6 1045.21   7
   2   5  -2 27404.9 1077.17   7
  -2   5   2 25452.6 1010.64   7
   1   5  -2 465.790 376.996   7
  -1   5   2 373.212 365.507   7
   0   5  -2 23354.4 903.583   7
   0   5   2 21991.1 978.726   7
   1   5   2 1390.81 469.982   7
   2   5   2 2042.99 499.907   7
   3   5   2 37216.5 1367.63   7
   4   5   2 46787.2 1596.87   7
   5   5   2 9533.39 859.230   7
   6   5   2 4789.27 730.424   7
   7   5   2 34469.2 1572.37   7
   8   5   2 14979.3 1139.45   7
   8   5   2 16545.6 1196.24   9
  -9   5  -2 5327.25 1000.40   4
   9   5   2 4514.78 776.417   9
   9   5   2 5165.75 797.829   7
   9   5   2 4473.46 707.716   1
 -10   5  -2 16811.6 1429.64   4
  10   5   2 13888.7 1046.84   9
  10   5   2 14727.5 1105.01   7
  11   5   2 4115.49 678.176   1
  11   5   2 5083.30 719.380   9
  11   5   2 5604.13 755.130   7
 -11   5  -2 5138.59 1082.93   4
  12   5   2 34761.0 1391.91   9
 -12   5  -2 33078.5 1703.45   4
  13   5   2 525.070 481.380   9
 -13   5  -2 145.779 782.982   4
 -14   5  -2 10147.9 1036.52   4
 -15   5  -2 4211.04 742.330   4
 -16   5  -2 3205.99 626.276   4
 -17   5  -2 2538.57 437.585   4
 -15   6   2 53228.2 1303.77   4
 -14   6   2 3997.36 658.058   4
 -13   6   2 87713.5 2103.72   4
 -12   6   2 27430.0 1357.51   4
 -11   6   2 70810.6 2147.62   4
 -10   6   2 61807.7 2089.97   4
   9   6  -2 7927.19 885.553   7
  -9   6   2 7182.06 985.965   4
   8   6  -2 110552. 2456.83   9
  -8   6   2 114528. 2677.39   4
   8   6  -2 108799. 2661.17   7
   8   6  -2 121218. 2869.45  11
  -8   6   2 124344. 3090.51  13
  -7   6   2 2562.96 715.974   4
   7   6  -2 1330.76 585.819   9
   7   6  -2 1681.98 655.599   7
  -7   6   2 1136.58 993.269  13
   7   6  -2 1698.81 717.433  11
  -6   6   2 135409. 2697.61   4
   6   6  -2 131098. 2991.46  11
   6   6  -2 128761. 2807.96   7
   5   6  -2 64729.9 2109.55  15
   5   6  -2 60888.2 2083.74  11
  -5   6   2 65489.2 2573.97  15
  -5   6   2 66318.8 1865.22   4
   5   6  -2 62295.3 1933.73   7
  -4   6   2 74354.4 1919.71   4
   4   6  -2 73955.8 2203.50  11
   4   6  -2 74038.1 2025.51   7
  -3   6   2 96845.5 2070.47   7
   3   6  -2 101807. 2269.67   7
   2   6  -2 6482.00 697.580   7
  -2   6   2 5819.53 640.692   7
   1   6  -2 160009. 2592.84   7
  -1   6   2 146128. 2609.81   7
   0   6   2 10237.5 836.183   7
   1   6   2 154871. 2796.42   7
   2   6   2 67555.6 1938.71   7
   3   6   2 60065.3 1895.86   7
   4   6   2 165524. 3143.61   7
   4   6   2 175964. 3338.49  11
  -4   6  -2 174624. 3743.82  15
  -5   6  -2 6042.33 774.764   4
   5   6   2 6141.92 1054.99  15
   5   6   2 7821.74 1042.78   9
   5   6   2 5913.91 817.288   7
  -5   6  -2 7165.06 1192.60  15
   5   6   2 5889.59 865.476  11
   6   6   2 132141. 2945.02   9
   6   6   2 126148. 2945.46  11
   7   6   2 9518.04 964.250  11
   7   6   2 10755.2 1018.59   9
  -7   6  -2 7918.29 862.060   4
   7   6   2 9654.84 998.834   7
   8   6   2 95561.8 2405.76   9
   8   6   2 97884.9 2655.49  11
   8   6   2 94612.4 2580.49   7
   9   6   2 85986.8 2409.61  11
   9   6   2 79350.7 2136.25   9
   9   6   2 84886.1 2349.18   7
  10   6   2 40860.1 1606.03  11
  10   6   2 36749.8 1443.16   9
 -10   6  -2 41809.6 1727.93   4
  11   6   2 75593.3 2009.57  11
  11   6   2 69409.8 1850.85   9
 -11   6  -2 74565.7 2190.47   4
  12   6   2 1743.29 480.567  11
  12   6   2 1629.75 505.090   9
 -12   6  -2 2027.45 755.435   4
 -13   6  -2 56914.7 1678.87   4
  13   6   2 64660.7 1489.66  11
 -14   6  -2 12223.2 817.082   4
 -15   6  -2 23485.3 845.145   4
 -13   7   2-109.447 457.982   4
 -12   7   2 10087.8 770.035   4
 -11   7   2 7455.05 795.532   4
 -10   7   2 6995.29 844.210   4
  -9   7   2 8276.46 904.061   4
  -8   7   2 9340.76 913.031   4
   8   7  -2 10776.2 920.558  11
  -7   7   2 15977.7 1087.45   4
   7   7  -2 18611.8 1212.09  11
   6   7  -2 277.900 613.015  11
  -6   7   2-326.038 835.534  15
  -6   7   2 294.767 570.325   4
   5   7  -2 11174.6 986.561   7
  -5   7   2 11075.0 1292.66  15
  -5   7   2 9809.66 900.058   4
  -4   7   2 4818.62 738.863   4
  -4   7   2 4249.27 1125.94  15
   4   7  -2 3933.66 758.566   7
   4   7  -2 6395.66 985.502  15
  -3   7   2 8623.23 831.869   4
  -3   7   2 7032.38 1251.19  15
   3   7  -2 10483.3 1183.02  15
  -2   7   2 11141.1 1492.18  15
  -2   7   2 12781.0 929.861   4
   2   7  -2 13516.8 1331.69  15
  -1   7   2 2827.99 1159.38  15
  -1   7   2 2560.75 638.562   7
  -1   7   2 2126.87 769.661   4
   1   7  -2 2626.72 1068.71  15
   0   7  -2 14524.4 1067.87   4
   0   7   2 21332.0 1222.04   4
   0   7   2 20420.8 1793.17  15
   0   7   2 14206.7 967.201   7
   0   7  -2 21208.4 1717.96  15
   1   7   2 26310.8 1314.79   4
   1   7   2 23249.1 1297.28  11
  -1   7  -2 21247.6 1706.81  15
   1   7   2 24074.1 1799.84  15
   1   7   2 22258.5 1233.04   7
   2   7   2 10392.9 1324.94  15
  -2   7  -2 9037.29 775.851   4
   2   7   2 13689.4 1064.11   7
  -2   7  -2 12549.8 1383.76  15
   2   7   2 11494.6 1007.51  11
   3   7   2 24349.3 1351.31  11
  -3   7  -2 24999.9 1680.08  15
   3   7   2 25668.6 1347.11   7
   3   7   2 24817.2 1646.38  15
   4   7   2 11449.2 997.864   7
  -4   7  -2 13727.1 1318.34  15
   4   7   2 11508.5 1042.37  11
  -4   7  -2 8881.53 798.884   4
   4   7   2 10441.4 1171.76  15
   5   7   2 35856.8 1630.91  11
   5   7   2 36630.8 1747.64  15
  -5   7  -2 43035.1 1920.51  15
   5   7   2 42209.3 1650.05   9
  -5   7  -2 40358.5 1462.18   4
   5   7   2 37846.2 1656.90   7
   6   7   2 542.544 581.743  11
  -6   7  -2 86.6882 611.178   4
   6   7   2-9.88717 579.848   9
  -7   7  -2 23128.9 1193.70   4
   7   7   2 22034.8 1181.19   9
   7   7   2 21997.4 1301.76  11
  -8   7  -2 4655.66 751.862   4
   8   7   2 4080.50 665.382   9
   8   7   2 4102.94 729.565  11
   9   7   2 12602.3 866.881   9
   9   7   2 14733.4 992.770  11
  -9   7  -2 13963.8 999.128   4
  10   7   2 8563.76 733.232  11
 -10   7  -2 6825.44 790.429   4
  10   7   2 7724.29 692.269   9
 -11   7  -2 1304.77 619.654   4
  11   7   2 1258.30 440.956  11
 -12   7  -2 9964.80 728.174   4
  12   7   2 10123.9 599.549  11
 -13   7  -2 3708.47 496.201   4
 -11   8   2 26969.3 846.337   4
 -10   8   2 20884.3 901.912   4
  -9   8   2 11581.8 812.729   4
  -8   8   2 57797.4 1600.60   4
  -7   8   2 3648.77 685.410   4
  -6   8   2 84462.7 1982.83   4
  -6   8   2 97054.4 2164.96  15
  -5   8   2 18496.8 1216.22  15
  -5   8   2 16849.0 1043.07   4
  -4   8   2 43983.3 1511.08   4
  -4   8   2 47757.6 1934.23  15
   4   8  -2 50740.2 1758.27  15
  -3   8   2 88087.9 2682.55  15
   3   8  -2 90624.0 2405.25  15
  -3   8   2 87073.6 2022.39   4
   2   8  -2 19807.6 1412.60  15
  -2   8   2 16858.6 1062.56   4
  -1   8   2 97631.9 2104.92   4
   1   8  -2 99555.8 2774.01  15
  -1   8   2 100063. 3002.84  15
   0   8  -2 8749.93 1308.26  15
   0   8   2 1870.20 905.272  15
   1   8   2 98859.8 2893.70  15
  -1   8  -2 97024.7 2783.91  15
  -2   8  -2 36263.5 1361.49   4
  -2   8  -2 32312.3 1759.24  15
  -3   8  -2 36721.5 1773.34  15
  -3   8  -2 32017.5 1290.43   4
  -4   8  -2 89068.8 1963.34   4
  -4   8  -2 94548.5 2467.04  15
   5   8   2 849.185 571.948  15
  -6   8  -2 87221.8 1940.02   4
   7   8   2 25506.4 1181.38  11
  -7   8  -2 25804.9 1137.43   4
  -8   8  -2 33380.6 1171.69   4
  -9   8  -2 43253.6 1196.62   4
  -6   9   2 13503.0 798.182   4
  -5   9   2 24193.2 987.375   4
  -4   9   2 20546.5 999.699  15
  -4   9   2 29769.6 1077.54   4
  -3   9   2 7714.33 858.633  15
  -2   9   2 31011.1 1296.83  15
  -1   9   2 4565.95 800.889  15
   0   9   2 22045.2 1149.51  15
   1   9   2 10392.1 875.813  15
   2   9   2 19601.3 1041.18  15
   3   9   2 19532.3 953.520  15
   4   9   2 5043.86 659.832  15
  20   0  -3 171.145 269.267  14
  19   0  -3 28.7292 346.454  14
  18   0  -3 83.9635 391.417  14
  17   0  -3 71.6163 429.226  14
  16   0  -3 253.444 466.543  14
  15   0  -3-117.193 478.407  14
  14   0  -3-49.9493 470.540  14
  13   0  -3-110.297 400.492   1
  12   0  -3 70.1117 391.688   1
  11   0  -3-30.9174 382.558   1
  10   0  -3 61.6764 427.244   1
   9   0  -3 308.988 526.826   1
   8   0  -3 109.725 741.959   1
   7   0  -3 191.273 806.655   1
  -6   0   3 268.536 712.176   8
  -5   0   3 439.673 696.705   6
  -5   0   3 157.240 537.048   8
   5   0  -3 392.449 687.682   6
  -4   0   3 438.533 671.164   6
  -3   0   3 602.004 628.302   6
  -2   0   3-87.3105 455.151   6
   1   0  -3 416.402 266.453   5
   0   0  -3 128.347 253.063   5
   0   0   3 31.9629 259.215   5
   1   0   3 469.974 288.359   5
   2   0   3 577.833 261.458   6
   3   0   3 268.844 307.208   6
   4   0   3 110.618 409.141   6
  -4   0  -3 81.3063 400.007   6
   5   0   3 524.459 508.435   6
  -5   0  -3 522.913 545.692   6
   5   0   3 21.6660 358.123   1
   6   0   3 638.075 476.047   1
   6   0   3 136.437 629.945   6
  -6   0  -3-181.432 650.057   6
  -7   0  -3 164.472 973.637   6
   7   0   3 122.726 724.813   6
   7   0   3 401.388 540.877   1
   8   0   3 192.227 474.881   1
   9   0   3 180.058 430.534   1
  10   0   3 120.541 421.474   1
  11   0   3 121.026 437.627   1
  12   0   3 38.0737 393.381   1
  13   0   3 20.3992 429.089   1
  14   0   3 462.648 476.352   2
  15   0   3 215.549 447.211   2
  16   0   3-233.028 454.503   2
  17   0   3-7.24472 388.642   2
  17   0   3 36.5047 444.427  14
  18   0   3 47.7907 378.279  14
  18   0   3 18.0504 332.905   2
  19   0   3 293.128 345.914  14
  20   1  -3 15206.4 548.298  14
  20  -1  -3 14590.7 552.683  14
  19  -1  -3 54171.2 1213.44  14
  19   1  -3 55227.6 1198.33  14
  18  -1  -3 6605.36 606.969  14
  18   1  -3 6281.91 572.855  14
  17  -1  -3 58589.4 1587.62  14
  17   1  -3 54994.0 1506.74  14
  16   1  -3 8392.94 747.736  14
  16  -1  -3 7417.64 729.716  14
  15   1  -3 117998. 2456.35   1
  15  -1  -3 111972. 2374.88  14
  14   1  -3 79281.5 2018.38  14
  14  -1  -3 79862.6 2046.67  14
  14   1  -3 78934.1 2027.46   2
  14   1  -3 81628.4 2050.00   1
  13   1  -3 75411.4 1996.58   2
  13   1  -3 73173.6 1957.09   1
  13   1  -3 72997.4 1953.80  14
  12   1  -3 192004. 3123.05   1
  11   1  -3 433.895 467.140   1
  10   1  -3 280426. 3826.73   1
   9   1  -3 65567.1 1990.17   1
   9  -1  -3 71547.7 1790.54   1
   8  -1  -3 83667.0 2142.02   1
   8   1  -3 74111.7 2375.94   1
  -7   1   3 368690. 7923.53   0
   7  -1  -3 356594. 4904.42   1
   7   1  -3 327902. 5311.36   1
  -7  -1   3 336865. 3710.55   8
  -6  -1   3 11389.6 790.120   8
  -5  -1   3 457535. 3115.68   8
  -5  -1   3 478608. 5407.46   6
  -5   1   3 482997. 6153.75   6
  -5   1   3 463644. 4407.46   8
   5  -1  -3 496677. 6547.16   6
  -4  -1   3 3674.81 675.047   6
  -4   1   3 4278.41 962.736   6
   4  -1  -3 4482.75 1034.21   6
  -3  -1   3 357743. 3658.73   6
  -3   1   3 357901. 4635.76   6
  -2   1   3 309574. 3955.42   6
   2  -1  -3 294995. 3653.10   6
   1  -1  -3 505210. 3717.86   6
   1   1  -3 509021. 2490.05   5
   0  -1  -3 484657. 3246.77   5
   0  -1   3 499184. 2445.57   5
   0   1   3 474706. 3302.06   6
   0   1   3 490111. 3232.05   5
   1  -1   3 9143.01 432.407   5
   1   1   3 6437.90 502.058   5
   2   1   3 999999. 5182.18   5
   2  -1   3 900456. 5238.14   6
   3   1   3 83559.3 1088.32   6
   3  -1   3 83068.2 1702.27   6
   4   1   3 369829. 2963.96   1
  -4  -1  -3 374458. 2735.55   6
  -5  -1  -3 424251. 4007.43   6
   5  -1   3 411986. 4574.24   6
   5   1   3 423724. 3835.52   1
   6   1   3 80257.0 2134.97   1
   6  -1   3 91931.0 1424.18   1
   6   1   3 77407.6 1562.04   7
   6   1   3 100878. 2133.62   6
   7   1   3 243891. 4084.90   1
   7  -1   3 284086. 2834.49   1
   8   1   3 3370.28 709.567   1
   8  -1   3 3348.75 555.925   1
   9  -1   3 218958. 2917.68   1
   9   1   3 232831. 3576.10   1
  10   1   3 97519.5 2315.85   1
  11   1   3 99416.8 2347.97   1
  12   1   3 165799. 2997.85   1
  13   1   3 14158.3 1026.27   2
  13   1   3 15191.0 991.565   1
  13  -1   3 15567.7 1019.48   2
  14   1   3 99013.2 2289.21   1
  14   1   3 101470. 2373.25   2
  15   1   3 10853.3 836.081   1
  15  -1   3 10385.2 839.614   2
  15   1   3 9891.75 882.851   2
  16  -1   3 128830. 2290.78   2
  16   1   3 130779. 2332.36  14
  17   1   3 35479.0 1182.17  14
  17   1   3 33168.1 1196.26   2
  17  -1   3 32027.5 1074.44   2
  18  -1   3 30364.5 1067.06  14
  18   1   3 28096.2 987.529   2
  19  -1   3 71158.8 1358.09  14
  19   2  -3 37.9036 301.529  14
  19  -2  -3 205.404 312.485  14
 -19   2   3-165.251 490.138   4
  18   2  -3 6801.00 547.857  14
  18  -2  -3 6238.31 563.028  14
  17  -2  -3 129.776 424.147  14
  17   2  -3 40.8392 432.852  14
  16  -2  -3 324.376 480.321  14
  16   2  -3 70.3384 420.838  14
  15   2  -3 456.530 473.909  14
  15   2  -3 192.704 453.009   1
  15  -2  -3 639.459 500.465  14
  14   2  -3 4111.68 625.861   2
  14   2  -3 4988.93 654.372   1
  14   2  -3 4707.27 687.945  14
  13   2  -3 198.972 440.973   1
  13   2  -3 280.004 556.711  14
  13   2  -3 464.471 515.387   2
  12   2  -3 15.9414 436.781   1
  11   2  -3 8023.29 772.655   1
  10   2  -3 186.826 455.235   1
   9   2  -3 16629.5 1053.74   1
   8   2  -3 2297.96 691.508   1
  -8   2   3 567.995 1117.44   0
  -7  -2   3 2655.74 656.376   8
  -7   2   3 3285.33 1381.31   0
   7   2  -3 3709.81 917.348   1
  -6   2   3 2720.55 1703.78   0
  -6  -2   3 1699.25 534.405   8
   6   2  -3 1736.20 980.389   1
  -5  -2   3 12153.3 622.306   8
  -4  -2   3 12096.3 914.201   6
  -4   2   3 12035.0 1059.39   6
  -4   2   3 11737.4 553.307   7
   4  -2  -3 13183.0 1412.75   6
  -4  -2   3 12667.3 548.048   8
  -3   2   3 9089.16 496.181   7
   3  -2  -3 11967.9 1311.90   6
  -3   2   3 10720.0 866.280   6
   2  -2  -3 16279.8 1360.76   6
   2  -2  -3 15690.4 761.382   5
  -2   2   3 15830.7 825.205   6
   2   2  -3 15307.2 379.005   5
  -2   2   3 16605.2 575.782   7
  -1   2   3 88769.7 1417.83   6
   1  -2  -3 86209.5 1574.09   5
   0  -2  -3 501545. 4050.23   6
   0  -2  -3 578547. 3948.00   5
   1  -2   3 1860.66 196.793   5
   1   2   3 1838.40 426.774   5
   1   2   3 1738.11 323.727   7
   2   2   3 46476.6 1266.57   5
   2  -2   3 43731.4 1422.45   6
   2   2   3 47130.5 935.278   7
   3  -2   3 25040.5 1174.29   6
   3   2   3 26419.8 1079.05   5
   3   2   3 27362.6 803.182   7
   3   2   3 26789.4 800.704   1
   4   2   3 755.284 497.158   5
   4   2   3 896.668 444.260   1
   4   2   3 798.017 396.662   7
   5   2   3 19881.1 1037.82   1
   5   2   3 19541.6 853.933   7
   6   2   3 15247.3 1173.64   1
   6   2   3 15183.1 883.938   7
   7   2   3 3123.26 864.579   1
   7   2   3 3356.56 687.495   7
   8   2   3 23093.9 1349.84   1
   8   2   3 16188.7 1034.00   7
   9   2   3 11744.8 978.021   1
  10   2   3 4350.95 702.485   1
  11   2   3 605.080 500.759   1
  12   2   3 3677.93 627.299   1
  13   2   3 3189.32 640.296   2
  13   2   3 3820.33 629.670   1
  13   2   3 3760.21 719.276  12
  14   2   3 2965.55 643.713  12
  14   2   3 2463.15 570.322   1
  14   2   3 2316.85 611.753   2
  15   2   3 13347.1 923.920   2
  15   2   3 15565.4 970.034   1
  16   2   3 83.3910 433.084   2
  17   2   3 377.730 396.535   2
  18   2   3 3409.24 455.055   2
  19  -2   3 2857.01 391.444  14
 -19   3   3 39771.7 956.987   4
 -18   3   3 604.242 544.504   4
  18  -3  -3 1238.34 368.195  14
  17   3  -3 94915.0 1647.97  14
  17  -3  -3 90897.8 1722.51  14
  16  -3  -3 9776.20 753.187  14
  16   3  -3 8836.40 693.158  14
  15  -3  -3 88319.9 2015.63  14
  15   3  -3 91014.0 1947.20  14
  14   3  -3 40357.2 1470.34  14
  14  -3  -3 43308.3 1517.56  14
  14   3  -3 42603.0 1554.36   1
  13   3  -3 12717.4 840.996   2
  13   3  -3 13930.8 927.532  14
  12   3  -3 173836. 2946.64  14
  12   3  -3 170727. 2814.95   2
  11   3  -3 1218.82 475.198   1
  10   3  -3 188540. 3149.64   1
  -9   3   3 44257.7 2904.39   0
   9   3  -3 40871.6 1508.40   1
  -8   3   3 219347. 6673.99   0
   8   3  -3 209495. 3325.86   1
  -7   3   3 132039. 5602.37   0
   7   3  -3 119564. 2616.75   1
   6   3  -3 65611.8 2094.58   1
  -6   3   3 72667.2 4499.40   0
  -5   3   3 304752. 9559.87   0
  -5   3   3 289578. 2826.85   7
  -4   3   3 1340.67 354.204   7
   4   3  -3 1814.11 1053.44   1
   3  -3  -3 390326. 3948.16   5
   3   3  -3 389636. 4883.58   1
  -3   3   3 395706. 2957.67   7
   2  -3  -3 285184. 3206.10   5
  -2   3   3 297503. 3297.36   6
   2  -3  -3 291689. 5549.06   6
  -2   3   3 289941. 2501.41   7
  -1  -3   3 170592. 1527.52   8
   1  -3  -3 167925. 2405.55   5
  -1   3   3 166029. 1908.32   7
   0  -3  -3 666375. 4732.77   5
   0   3   3 657200. 3803.84   7
   1   3   3 6936.30 517.710   7
   2   3   3 351173. 3625.19   5
   2   3   3 357858. 2989.57   7
   3   3   3 72694.6 1791.53   5
   3   3   3 75912.2 1375.46   1
   3   3   3 75368.9 1486.42   7
   4   3   3 435791. 3718.69   1
   4   3   3 424074. 3702.79   7
   5   3   3 36791.7 1315.61   1
   5   3   3 37047.7 1259.27   7
   6   3   3 48965.0 1735.06   1
   6   3   3 52458.5 1598.10   7
   7   3   3 365132. 5111.50   1
   7   3   3 330493. 4169.99   7
   8   3   3 20827.8 1289.08   1
   8   3   3 22432.2 1310.11   7
   9   3   3 248178. 3984.12   1
   9   3   3 254645. 3823.86   7
  10   3   3 25608.3 1272.96   7
  10   3   3 23346.1 1278.40   1
  11   3   3 114858. 2662.68   1
  12   3   3 175914. 3208.77   1
  12   3   3 178556. 3062.60   2
  13   3   3 9350.45 824.018   2
  13   3   3 7725.34 758.716   1
  13   3   3 9511.55 855.696   9
  14   3   3 185022. 3023.91   2
  14   3   3 192897. 3171.82   1
  15   3   3 14882.0 908.273   2
  16   3   3 43952.6 1346.31   2
  17   3   3 49096.5 1265.84   2
  18   3   3 29603.7 860.656   2
  18  -3   3 28378.0 912.476  14
  19  -3   3 25730.6 676.696  14
 -18   4   3 3484.76 492.635   4
 -17   4   3 1113.06 567.103   4
 -16   4   3 7025.25 831.558   4
 -15   4   3 3926.57 864.929   4
 -14   4   3 2856.03 876.782   4
  13   4  -3 7289.00 803.195   7
 -13   4   3 8035.89 1136.97   4
  13   4  -3 8926.96 813.462   1
 -12   4   3 6466.31 1109.15   4
  12   4  -3 7501.14 807.983   7
  12   4  -3 6437.21 725.306   1
  11   4  -3 3693.16 612.629   1
 -11   4   3 3481.73 1061.81   4
 -10   4   3 59.4458 959.043   4
  10   4  -3 222.336 424.032   1
   9   4  -3 19612.4 1077.76   1
   8   4  -3 8614.46 771.029   1
  -7   4   3 1534.94 1340.10   0
   7   4  -3 1201.36 499.013   1
  -6   4   3 24871.3 2845.30   0
   6   4  -3 24007.8 1154.87   1
   5   4  -3 4943.86 654.074   1
  -5   4   3 3988.57 1758.57   0
  -5   4   3 4399.20 507.882   7
  -4   4   3 34099.6 3455.28   0
  -4   4   3 33252.8 1036.36   7
  -3   4   3 16300.6 2733.78   0
   3   4  -3 15783.1 859.134   7
  -3   4   3 15520.0 752.443   7
   2   4  -3 7054.34 581.603   7
  -2   4   3 8676.12 2226.65   0
  -2   4   3 6455.33 548.451   7
   1   4  -3 38009.1 1041.86   7
  -1   4   3 33973.1 3711.94   0
  -1   4   3 30854.3 1014.50   7
   0   4   3 10005.7 641.711   7
   0   4  -3 11544.4 582.074   7
   0   4   3 11520.3 2317.20   0
   1   4   3 64842.9 1479.69   7
   1   4   3 67282.2 4450.14   0
   2   4   3 5613.64 1672.67   0
   2   4   3 5024.41 532.040   7
   3   4   3 1580.65 470.754   7
   4   4   3 30351.2 1198.65   7
   5   4   3 29493.7 1154.41   1
   5   4   3 28695.1 1241.49   7
   6   4   3 308.732 452.653   1
   6   4   3 527.630 561.238   7
   7   4   3-114.384 565.774   1
   7   4   3 754.778 591.324   7
   8   4   3 1049.08 586.812   1
   8   4   3 855.272 588.022   7
   9   4   3 689.637 611.106   7
   9   4   3 40.4576 540.272   1
  10   4   3 10286.1 1008.65   9
  10   4   3 12896.1 1004.82   1
  10   4   3 13801.0 1040.73   7
  11   4   3 1664.58 602.251   2
  11   4   3 1371.45 530.865   1
  11   4   3 874.249 575.384   7
  11   4   3 1229.00 663.084   9
  12   4   3 10483.9 873.461   1
  12   4   3 11378.6 924.688   9
  13   4   3 13988.5 969.418   1
  13   4   3 14908.9 929.184   2
  13   4   3 13983.7 946.077   9
  14   4   3 685.313 454.687   2
  14   4   3 748.330 502.038   9
  15   4   3 7898.39 636.469   2
 -15   4  -3 6942.87 945.439   4
  16   4   3 2685.54 431.407   2
 -16   4  -3 2139.38 724.275   4
 -17   4  -3 1433.21 566.158   4
 -17   5   3 55105.9 1127.21   4
 -16   5   3 1791.00 552.564   4
 -15   5   3 40967.2 1451.72   4
 -14   5   3 25300.4 1312.50   4
 -13   5   3 47295.8 1848.03   4
 -12   5   3 57925.7 2142.28   4
 -11   5   3 8254.88 1119.64   4
  11   5  -3 7399.82 805.627   7
  11   5  -3 9100.34 840.618   1
 -10   5   3 190423. 3756.60   4
  10   5  -3 181478. 3259.03   7
  -9   5   3 20494.3 1403.87   4
   9   5  -3 18447.9 1158.46   7
   9   5  -3 19124.0 1083.27   1
   8   5  -3 71976.7 2045.94   9
   8   5  -3 68548.6 2140.90   7
  -8   5   3 72435.5 2274.51   4
   7   5  -3 146714. 2991.50   7
   6   5  -3 29358.4 1359.38   7
   5   5  -3 245696. 3587.48   7
  -5   5   3 254700. 3271.45   7
   4   5  -3 6774.33 712.859   7
  -4   5   3 5150.13 1609.14   0
  -4   5   3 6078.53 589.889   7
  -3   5   3 182760. 7325.98   0
   3   5  -3 194067. 2883.85   7
  -3   5   3 184389. 2649.33   7
  -2   5   3 52394.8 4066.87   0
   2   5  -3 58110.1 1525.46   7
  -2   5   3 54771.2 1477.32   7
  -1   5   3 150096. 6791.75   0
   1   5  -3 163107. 2333.22   7
  -1   5   3 148610. 2456.14   7
   0   5   3 213248. 7533.88   0
   0   5   3 213845. 2971.66   7
   1   5   3 30144.1 2827.54   0
   1   5   3 30791.1 1204.01   7
   2   5   3 287743. 3619.02   7
   3   5   3 28162.1 1249.50   7
   4   5   3 126458. 2595.84   7
   5   5   3 80981.7 2174.79   7
   6   5   3 25381.2 1357.22   7
   7   5   3 153859. 3217.71   7
   8   5   3 1444.19 665.752   7
  -8   5  -3 1450.28 903.253   4
   8   5   3 596.272 710.052   9
   9   5   3 146648. 3079.47   9
   9   5   3 148501. 3171.78   7
  10   5   3 24387.0 1337.43   9
  10   5   3 27052.6 1328.09   1
  10   5   3 26271.2 1368.23   7
  11   5   3 76146.9 2111.34   9
  11   5   3 83113.1 2149.71   7
  11   5   3 79693.9 2113.40   1
 -12   5  -3 73264.3 2308.37   4
  12   5   3 70447.0 1952.24   9
 -13   5  -3 25495.7 1440.01   4
  13   5   3 27433.3 1178.40   9
 -14   5  -3 87990.2 2223.19   4
 -15   5  -3 1169.70 621.258   4
 -16   5  -3 58404.1 1355.94   4
 -15   6   3 2803.89 497.547   4
 -14   6   3 336.407 512.930   4
 -13   6   3 3364.68 691.580   4
 -12   6   3 354.703 684.552   4
 -11   6   3 1028.17 721.435   4
 -10   6   3 5542.25 895.501   4
   9   6  -3 6978.31 855.019   7
  -9   6   3 7013.31 967.029   4
  -9   6   3 8079.74 1180.88  13
  -8   6   3 15214.6 1134.12   4
   8   6  -3 15043.0 1135.66   7
  -7   6   3 854.854 941.296  13
   7   6  -3 476.135 577.869   7
  -7   6   3 460.601 640.566   4
   6   6  -3 9238.85 984.956  11
  -6   6   3 9176.72 884.013   4
  -6   6   3 8556.92 1299.67  13
   6   6  -3 7745.49 853.223   7
  -5   6   3 1453.62 1088.47  13
   5   6  -3 1612.58 702.593  11
   5   6  -3 1472.47 600.814   7
   5   6  -3 3150.23 833.844  15
  -5   6   3 1194.48 631.567   4
  -4   6   3 32784.2 1274.66   7
   4   6  -3 28950.8 1480.12  11
  -4   6   3 29357.5 1290.86   4
  -4   6   3 33280.9 1756.34  13
  -4   6   3 31470.1 2040.23   3
   4   6  -3 31260.4 1637.94  15
   4   6  -3 30202.3 1336.24   7
  -3   6   3 578.238 549.633   4
  -3   6   3 691.562 468.262   7
  -3   6   3 326.499 905.740  13
   3   6  -3 643.558 481.331   7
  -2   6   3 5069.95 667.729   7
  -1   6   3 16800.6 997.592   7
   0   6   3 1769.62 545.975   7
   1   6   3 8539.14 805.108   7
   2   6   3 3089.61 627.271   7
   3   6   3 28249.1 1373.90  11
  -3   6  -3 29041.6 1744.74  15
   3   6   3 25380.8 1310.26   7
   4   6   3 175.834 608.224   7
   4   6   3 514.051 1025.51   9
   4   6   3 103.217 638.429  11
  -4   6  -3 1689.08 932.601  15
   4   6   3 565.986 928.402   3
   5   6   3 2668.61 741.236  11
   5   6   3 2314.77 814.898   9
   5   6   3 3264.41 704.762   7
   6   6   3 12571.7 1061.94  11
   6   6   3 13920.5 1203.20   9
   6   6   3 13117.8 1103.87   7
  -7   6  -3 980.831 694.861   4
   7   6   3 614.149 590.571  11
   7   6   3 1218.46 706.936   9
   7   6   3 1047.35 703.965   7
   8   6   3 978.424 607.056  11
   8   6   3 910.964 682.531   7
  -8   6  -3 1041.87 726.035   4
   8   6   3 1102.69 647.188   9
   9   6   3 236.803 579.060   9
   9   6   3 611.405 542.703  11
  -9   6  -3 469.074 709.185   4
   9   6   3 251.122 641.376   7
 -10   6  -3 11619.1 1080.39   4
  10   6   3 11790.5 968.802  11
  10   6   3 9345.13 849.762   9
  11   6   3 7012.64 729.550   9
 -11   6  -3 8336.15 949.717   4
  11   6   3 9105.70 813.417  11
  12   6   3 6543.89 658.522  11
 -12   6  -3 6726.46 862.667   4
  12   6   3 6844.37 684.181   9
  13   6   3 24416.1 960.732  11
 -13   6  -3 21087.8 1082.40   4
  14   6   3 221.447 308.192  11
 -14   6  -3-101.146 502.626   4
 -13   7   3 14141.1 745.456   4
 -12   7   3 66371.4 1582.59   4
 -11   7   3 866.181 578.407   4
 -10   7   3 53984.0 1690.67   4
  -9   7   3 34117.1 1416.88   4
  -8   7   3 35034.8 1451.66   4
  -7   7   3 95648.7 2265.15   4
  -6   7   3 1150.85 645.004   4
  -6   7   3 118.628 885.473  15
  -5   7   3 95253.6 2250.99   4
   5   7  -3 97578.9 2469.07  15
   5   7  -3 107463. 2448.06   7
  -5   7   3 103524. 3037.04  15
   4   7  -3 24302.3 1479.79  15
  -4   7   3 19691.1 1645.68  15
  -4   7   3 20855.8 1149.48   4
  -3   7   3 83072.6 2080.18   4
   3   7  -3 81254.8 2564.50  15
   2   7  -3 38013.2 1907.00  15
  -2   7   3 30322.0 2050.30  15
  -2   7   3 31853.9 1362.38   4
  -2   7   3 36291.0 1428.68   7
  -1   7   3 47960.4 1686.95   4
   1   7  -3 50267.8 2269.27  15
   0   7   3 81160.9 2135.87   7
   0   7   3 86344.8 2109.01   4
   1   7   3 7775.51 855.314  11
   1   7   3 7872.91 876.159   7
  -1   7  -3 8548.23 1349.95  15
   2   7   3 189744. 4300.11  15
   2   7   3 180939. 3354.54  11
   2   7   3 170484. 2908.03   4
   2   7   3 194773. 3394.88   7
  -2   7  -3 168479. 3821.31  15
   3   7   3 23312.7 1320.63  11
   3   7   3 23086.7 1297.84   7
   3   7   3 22296.9 1560.73  15
  -3   7  -3 26318.2 1759.06  15
   4   7   3 66618.6 2143.39  11
   4   7   3 65027.5 2094.06   7
  -4   7  -3 72592.8 2428.24  15
   4   7   3 69692.1 2431.31  15
   5   7   3 94357.7 2540.40  11
   5   7   3 95483.7 2665.04  15
   5   7   3 94427.5 2508.24   7
   6   7   3 6044.22 828.177  11
  -6   7  -3 7584.95 837.702   4
   6   7   3 7540.82 864.826   9
  -7   7  -3 98019.1 2163.82   4
   7   7   3 90188.7 2211.30   9
   8   7   3 3984.40 662.686   9
  -8   7  -3 4776.60 779.252   4
   8   7   3 4891.75 742.683  11
   9   7   3 51391.5 1552.46   9
   9   7   3 55094.4 1754.82  11
 -10   7  -3 40664.1 1397.23   4
  10   7   3 37255.6 1250.97   9
  10   7   3 40963.9 1393.77  11
  11   7   3 29400.2 1067.24  11
 -11   7  -3 27945.9 1084.50   4
  11   7   3 27789.2 1016.09   9
  12   7   3 38689.4 1049.51  11
 -12   7  -3 5915.75 543.786   4
  13   7   3 4372.78 365.207  11
 -11   8   3 19942.7 772.367   4
 -10   8   3 491.208 441.392   4
  -9   8   3 11924.3 813.029   4
  -8   8   3 6684.13 734.015   4
  -7   8   3 2528.33 636.114   4
  -6   8   3 10215.7 836.986   4
  -6   8   3 12485.0 975.311  15
  -5   8   3-117.412 689.056  15
  -5   8   3-355.430 643.750   4
  -4   8   3 11319.3 1131.86  15
  -4   8   3 11023.0 924.483   4
  -3   8   3 2767.25 886.563  15
  -3   8   3 4699.09 794.517   4
   2   8  -3 25668.5 1537.59  15
  -2   8   3 22789.8 1176.01   4
  -1   8   3 19041.1 1155.90   4
   1   8  -3 21329.6 1502.18  15
   0   8   3 31851.1 1352.67   4
   0   8  -3 27006.6 1720.94  15
  -1   8  -3 54397.6 2145.03  15
   1   8   3 47835.1 2074.31  15
   2   8   3 2386.79 807.873  15
  -2   8  -3 15211.9 1432.28  15
   3   8   3 40712.2 1743.07  15
   4   8   3 7734.23 881.010  15
   5   8   3 12338.5 947.460  11
   5   8   3 11148.1 901.103  15
   6   8   3 11664.1 885.486  11
   7   8   3 3147.34 594.863  11
   7   8   3 2837.30 501.139   9
   8   8   3 12830.1 802.741  11
  -6   9   3 20610.8 874.320   4
  -5   9   3 57318.0 1307.91   4
  -4   9   3 6688.82 766.229  15
  -3   9   3 45441.6 1416.96  15
  -2   9   3 22544.1 1114.33  15
  -1   9   3 34014.1 1339.34  15
   0   9   3 34376.0 1345.33  15
   1   9   3 4718.32 687.723  15
   2   9   3 35851.7 1248.79  15
   3   9   3 4660.23 655.810  15
   4   9   3 44624.4 1165.34  15
  20   0  -4 376.104 261.400  14
  19   0  -4 54475.9 1207.10  14
  18   0  -4 22694.5 937.574  14
  17   0  -4 21131.3 992.770  14
  16   0  -4 63314.4 1742.42  14
  15   0  -4 8886.52 802.356  14
  14   0  -4 109844. 2386.88  14
  13   0  -4 33760.6 1401.81  14
  13   0  -4 34233.6 1329.24   1
  12   0  -4 108450. 2326.49   1
  11   0  -4 125932. 2569.92   1
  10   0  -4 115639. 2663.64   1
   9   0  -4 206704. 4117.36   1
   8   0  -4 22890.6 1615.69   1
  -7   0   4 541277. 4996.81   8
  -6   0   4 13604.4 913.176   8
  -5   0   4 285151. 2752.11   8
  -4   0   4 448838. 2935.52   8
  -4   0   4 464513. 5521.53   6
  -3   0   4 246247. 3579.91   6
  -2   0   4 678706. 5177.39   6
   1   0  -4 10770.1 566.005   5
   0   0   4 13449.5 633.166   5
   0   0  -4 12894.8 608.134   5
   1   0   4 85570.4 1476.26   5
   2   0   4 89269.1 1368.16   6
   2   0   4 87007.3 1628.39   5
   3   0   4 476839. 3429.00   6
   4   0   4 525.904 300.021   1
   4   0   4 1174.62 396.677   6
   5   0   4 731840. 5631.20   6
   5   0   4 716036. 4025.15   1
   6   0   4 137091. 2900.22   6
   6   0   4 128180. 2009.24   1
   7   0   4 524253. 4623.34   1
   8   0   4 107965. 2453.16   1
   9   0   4 55992.6 1754.25   1
  10   0   4 341259. 4199.45   1
  11   0   4 320.960 425.514   1
  12   0   4 99079.8 2276.07   1
  13   0   4 13558.1 921.366   1
  13   0   4 17126.8 1100.38   2
  14   0   4 47757.6 1670.32   2
  15   0   4 80161.8 1969.47  12
  15   0   4 72096.6 1941.60   2
  16   0   4 17784.2 1004.25   2
  17   0   4 84655.7 1785.35   2
  18   0   4 8853.80 632.358  14
  18   0   4 7912.02 562.634   2
  19   0   4 83809.5 1326.96  14
  19   1  -4 214.572 322.156  14
  19  -1  -4 366.294 342.484  14
  18  -1  -4 185.523 388.055  14
  18   1  -4 181.736 377.058  14
  17  -1  -4 4685.61 584.955  14
  17   1  -4 4380.66 593.076  14
  16  -1  -4 7071.30 710.346  14
  16   1  -4 5564.91 644.353  14
  15   1  -4 637.112 484.257   1
  15  -1  -4 755.412 534.450  14
  15   1  -4 458.298 481.702  14
  14   1  -4 2312.30 586.738  14
  14   1  -4 2057.41 484.463   1
  14  -1  -4 2333.77 590.359  14
  13   1  -4-9.53605 430.908   1
  13   1  -4 140.046 585.500  14
  13  -1  -4 49.9219 517.315  14
  12   1  -4 7733.82 771.389   1
  11   1  -4 5712.35 745.649   1
  10   1  -4 19634.0 1228.76   1
   9  -1  -4 561.749 488.269   1
   9   1  -4 680.599 776.276   1
  -8  -1   4 6276.57 872.666   8
   8  -1  -4 6456.52 1132.69   1
   8   1  -4 6668.17 1194.42   1
  -7  -1   4 56773.6 1577.92   8
  -6  -1   4 10786.9 718.527   8
  -6   1   4 11514.4 1112.68   8
   5  -1  -4 8423.40 1322.83   6
  -5  -1   4 8400.57 588.948   8
  -5   1   4 8975.38 887.801   8
  -4  -1   4 50003.8 1722.01   6
  -4  -1   4 45422.3 952.733   8
  -4   1   4 47639.0 2068.33   6
   4  -1  -4 45271.9 2002.61   6
  -4   1   4 45468.0 1256.63   8
  -3   1   4 1340.78 921.737   6
  -3  -1   4 1613.10 523.535   6
   3  -1  -4 1479.80 671.785   6
  -3  -1   4 1756.95 365.615   8
   2   1  -4 98904.9 1437.63   5
   2  -1  -4 98631.8 1759.69   5
  -2   1   4 95258.6 2423.10   6
   1   1  -4 560.591 259.647   5
   1  -1  -4 904.664 376.928   5
  -1   1   4 1093.99 569.160   6
   0   1   4 3100.53 485.194   6
   0  -1  -4 3353.96 455.776   5
   1  -1   4 153677. 1769.11   5
   1   1   4 152333. 2149.00   5
   2  -1   4 5770.61 498.307   5
   2  -1   4 5175.54 549.903   6
   2   1   4 3929.58 175.225   6
   2   1   4 4621.44 214.039   6
   2   1   4 5672.64 598.664   5
   3   1   4 46042.7 1418.70   5
   3  -1   4 46219.6 1343.38   6
   3   1   4 44393.1 918.186   1
   3   1   4 46492.3 810.685   6
   4   1   4 24874.7 784.782   6
   4   1   4 22598.5 779.663   1
   4  -1   4 21651.5 1049.39   6
   4   1   4 24057.6 1211.34   5
   5  -1   4 103064. 2338.59   6
   5  -1   4 98435.2 1340.46   1
   5   1   4 101373. 1789.63   1
   6  -1   4 8193.02 507.490   1
   6   1   4 7945.11 758.631   1
   7  -1   4 1423.79 377.082   1
   7   1   4 700.174 670.971   1
   8   1   4 2692.04 789.819   1
   8  -1   4 2985.96 445.277   1
   9  -1   4 22268.3 1008.65   1
   9   1   4 32919.7 1517.33   1
  10   1   4 50.5527 512.812   1
  11   1   4 2599.34 580.248   1
  12   1   4 6227.35 720.107   1
  13   1   4 6459.58 802.327  12
  13   1   4 6038.03 717.894   1
  13   1   4 5825.30 824.089   2
  13  -1   4 6336.75 783.426   2
  14   1   4 468.156 417.370   1
  14   1   4 193.111 556.651  12
  14   1   4 869.994 537.770   2
  14  -1   4 394.814 530.052   2
  15   1   4 494.256 522.726   1
  15   1   4 703.116 486.310   2
  15   1   4 849.627 555.498  12
  15  -1   4 164.568 452.012   2
  16  -1   4 240.734 406.724   2
  16   1   4-59.1264 472.508  14
  16   1   4 31.3463 443.762   2
  17  -1   4 1420.38 366.843   2
  17   1   4 2370.98 499.250   2
  17   1   4 2219.24 460.611  14
  18   1   4 304.517 361.299   2
  18  -1   4 160.947 394.863  14
  19  -1   4 738.198 347.349  14
  19  -2  -4 35334.9 869.297  14
  19   2  -4 36743.1 871.168  14
  18   2  -4 28453.2 934.156  14
  18  -2  -4 27493.5 951.091  14
 -18   2   4 25214.8 1119.19   4
  17   2  -4 34752.1 1146.80  14
  17  -2  -4 34302.3 1193.34  14
  16   2  -4 90138.3 1943.46  14
  16  -2  -4 95552.3 2078.82  14
  15   2  -4 2341.33 537.902  14
  15  -2  -4 2411.20 613.070  14
  15   2  -4 2550.59 556.508   1
  14  -2  -4 109352. 2404.82  14
  14   2  -4 103207. 2338.74   1
  14   2  -4 103699. 2275.21  14
  13   2  -4 26590.6 1277.14  14
  13  -2  -4 29153.8 1343.94  14
  13   2  -4 25728.5 1243.50   1
  12   2  -4 105778. 2446.44   1
  11   2  -4 87134.3 2255.35   1
  10   2  -4 21234.8 1231.40   1
   9   2  -4 211205. 3896.43   1
  -8   2   4 1051.78 1545.91   0
  -8  -2   4 794.932 614.679   8
   8   2  -4 297.239 782.279   1
  -7   2   4 247088. 8010.15   0
  -7  -2   4 237989. 2971.03   8
   7   2  -4 234798. 4792.23   1
  -6  -2   4 86071.3 1592.79   8
  -5  -2   4 216966. 2176.73   8
  -4  -2   4 400861. 2695.14   8
  -4   2   4 403450. 3001.46   7
  -3   2   4 12208.0 907.761   6
  -3  -2   4 11835.2 516.020   8
  -3   2   4 11910.8 565.913   7
   2  -2  -4 428538. 3905.34   5
   2  -2  -4 356227. 4829.84   6
   2   2  -4 430714. 2382.08   5
  -2  -2   4 413333. 2372.77   8
  -2   2   4 427332. 2746.80   7
  -1   2   4 6928.96 479.823   6
   1  -2  -4 6067.72 586.247   5
  -1   2   4 6798.36 437.943   7
  -1  -2   4 7029.07 441.201   8
   0  -2  -4 553872. 4261.57   5
   0   2   4 548509. 2626.91   6
   1  -2   4 113820. 1277.18   5
   1   2   4 112613. 2009.98   5
   2   2   4 223133. 2056.12   7
   2  -2   4 209438. 2018.67   5
   2   2   4 226994. 1957.81   1
   2   2   4 215751. 2895.52   5
   2  -2   4 213284. 3217.12   6
   3   2   4 272232. 2405.63   1
   3   2   4 272222. 2398.53   7
   4   2   4 24348.5 889.978   1
   4   2   4 24916.6 842.620   7
   5   2   4 523345. 4417.44   1
   5   2   4 527174. 3924.41   7
   6   2   4 26547.9 1294.82   1
   6   2   4 30208.6 1159.83   7
   7   2   4 155621. 3495.93   1
   7   2   4 117365. 2407.27   7
   8   2   4 247074. 4511.32   1
   9   2   4 37998.5 1710.30   1
  10   2   4 283933. 4302.59   1
  11   2   4 1605.61 567.423   1
  12   2   4 202931. 3496.15   1
  12   2   4 205052. 3484.22   2
  13   2   4 75007.8 2117.43   1
  13   2   4 78703.1 1996.68  12
  13   2   4 76564.2 2116.50   2
  14   2   4 80991.2 1992.10  12
  14   2   4 78403.4 2084.62   1
  14   2   4 79038.4 2125.68   2
  15   2   4 112925. 2236.28  12
  15   2   4 106844. 2350.05   2
  16   2   4 17929.4 986.450   2
  17   2   4 119014. 2105.45   2
  18   2   4 5331.08 494.213   2
  19  -2   4 51643.3 1043.36  14
 -18   3   4 5774.24 641.910   4
  18   3  -4 7158.71 472.533  14
  17   3  -4-66.3715 366.260  14
  17  -3  -4 11.4717 338.113  14
 -17   3   4 297.907 614.078   4
 -16   3   4 488.960 695.517   4
  16   3  -4 581.841 434.101  14
  16  -3  -4 106.328 427.017  14
  15   3  -4 8380.73 737.592  14
  15  -3  -4 8128.37 747.344  14
  14   3  -4 2679.94 592.754  14
  14   3  -4 2259.04 539.042   1
  13   3  -4 8631.81 833.576  14
  13   3  -4 7461.75 739.181   1
  12   3  -4 2789.18 664.427  14
  12   3  -4 4324.23 643.119   1
  11   3  -4 8508.74 786.262   1
  10   3  -4 1588.26 533.175   1
  -9   3   4 3441.06 1515.91   0
   9   3  -4 3287.41 641.065   1
   8   3  -4 10199.7 977.648   1
  -8   3   4 13799.2 2246.11   0
  -7   3   4-125.267 1654.14   0
   7   3  -4 591.368 685.366   1
  -6   3   4 24657.8 3303.83   0
   6   3  -4 16360.8 1538.96   1
  -5   3   4 48139.1 1250.38   7
   5   3  -4 48647.8 2185.89   1
  -5   3   4 43590.1 4173.23   0
  -4   3   4 2766.49 1897.46   0
  -4   3   4 1322.96 363.471   7
  -4  -3   4 1483.11 372.454   8
  -3  -3   4 12304.0 551.050   8
  -3   3   4 14138.1 662.073   7
  -2  -3   4 1222.87 323.002   8
  -2   3   4 1348.35 349.462   7
  -1  -3   4 119196. 1422.29   8
  -1   3   4 117678. 1694.08   7
   0  -3  -4 28405.7 1136.75   5
   0   3   4 27626.2 879.868   7
   1   3   4 79320.9 1454.04   7
   1   3   4 82146.0 1150.88   1
   2   3   4 12049.2 537.210   1
   2   3   4 12298.1 662.037   7
   3   3   4 4927.98 439.524   1
   3   3   4 5131.24 516.258   7
   4   3   4 3833.58 470.338   1
   4   3   4 925.663 441.838   7
   5   3   4 2050.30 490.128   1
   5   3   4 2891.57 537.928   7
   6   3   4 11081.6 898.492   1
   6   3   4 11590.6 868.834   7
   7   3   4 31931.1 1422.62   7
   7   3   4 28420.3 1491.07   1
   8   3   4 1300.33 728.103   1
   8   3   4 801.844 654.119   7
   9   3   4 16816.5 1217.15   1
   9   3   4 16447.0 1130.07   7
  10   3   4 497.608 544.748   1
  11   3   4 12047.1 975.297   1
  12   3   4 149.973 670.215  12
  12   3   4 4.53071 660.116   9
  12   3   4 502.778 481.631   1
  12   3   4 270.821 579.774   2
  13   3   4 15071.4 1015.69   1
  13   3   4 15032.4 1002.25   2
  14   3   4 647.971 531.048   2
  14   3   4 423.708 468.498   1
  15   3   4 796.330 463.851   2
  16   3   4 11290.1 755.953   2
  17   3   4 5239.04 510.703   2
  18   3   4 145.679 299.528   2
 -18   3  -4-39.1704 511.441   4
 -17   4   4 11037.7 778.536   4
 -16   4   4 69325.1 1824.04   4
 -15   4   4 3497.28 814.201   4
 -14   4   4 81626.4 2518.67   4
 -13   4   4 45036.3 1970.52   4
  13   4  -4 50794.4 1708.40   7
  13   4  -4 48561.3 1626.40   1
  12   4  -4 50040.8 1662.64   1
 -12   4   4 52415.5 2177.98   4
 -11   4   4 142777. 3490.68   4
  11   4  -4 117426. 2525.74   1
  10   4  -4 2750.43 559.427   1
 -10   4   4 1659.29 931.930   4
   9   4  -4 205854. 3352.11   1
  -8   4   4 713.198 1566.28   0
   8   4  -4 1732.91 537.572   1
  -7   4   4 290224. 9044.69   0
   7   4  -4 271370. 3860.77   1
   6   4  -4 95160.8 2362.82   1
  -6   4   4 100811. 5681.99   0
   5   4  -4 57358.5 1932.54   1
  -5   4   4 53388.5 1425.53   7
  -4   4   4 237319. 9348.41   0
   4   4  -4 249687. 4007.54   1
  -4   4   4 238335. 2874.25   7
  -3   4   4 25228.7 967.314   7
  -3   4   4 23099.6 3616.30   0
  -2   4   4 151860. 2237.03   7
  -2   4   4 158715. 8422.02   0
  -1   4   4 55949.3 5514.09   0
   1   4  -4 59863.7 1286.89   7
  -1   4   4 53796.2 1356.80   7
   0   4   4 263798. 10909.3   0
   0   4   4 216694. 2707.35   7
   1   4   4 278205. 10405.6   0
   1   4   4 249689. 2973.65   7
   2   4   4 226352. 8384.01   0
   2   4   4 191637. 2690.03   7
   3   4   4 152479. 2478.04   7
   4   4   4 9950.57 661.520   1
   4   4   4 9522.20 772.133   7
   5   4   4 251748. 3201.88   1
   5   4   4 235990. 3407.00   7
   6   4   4 32184.4 1433.40   7
   6   4   4 34629.4 1391.49   1
   7   4   4 87644.2 2366.19   1
   7   4   4 90217.5 2449.89   7
   8   4   4 152016. 3356.19   1
   8   4   4 154502. 3367.47   7
   9   4   4 20029.6 1299.68   7
   9   4   4 17244.5 1246.66   1
  10   4   4 170952. 3364.33   1
  10   4   4 173922. 3402.70   9
  11   4   4 460.817 633.611   2
  11   4   4 1275.54 560.233   1
  11   4   4 445.211 631.911   9
  12   4   4 120132. 2634.73   1
  12   4   4 113479. 2556.42   9
  13   4   4 34345.8 1389.16   9
  13   4   4 39309.5 1395.02   2
  14   4   4 81774.8 1891.67   9
 -14   4  -4 75212.8 2265.55   4
  14   4   4 78759.1 1825.47   2
 -15   4  -4 76777.0 2132.07   4
  15   4   4 83210.4 1725.92   2
 -16   4  -4 1698.66 682.240   4
  16   4   4 3150.44 432.394   2
 -17   4  -4 41125.1 1163.38   4
  17   4   4 54691.9 1051.55   2
 -16   5   4 1379.94 524.474   4
 -15   5   4 3444.71 652.878   4
 -14   5   4 513.621 687.080   4
 -13   5   4 2859.31 818.403   4
 -12   5   4 17544.7 1276.08   4
  11   5  -4 3871.99 657.702   7
 -11   5   4 3405.58 921.197   4
  11   5  -4 3129.37 634.596   1
 -10   5   4 4054.13 907.796   4
  10   5  -4 4032.36 608.407   1
  10   5  -4 4069.16 722.543   7
  -9   5   4 365.637 1074.38  13
   9   5  -4 639.039 578.065   7
  -9   5   4 433.175 745.266   4
  -8   5   4 28419.2 1502.98   4
   8   5  -4 26499.2 1401.36   7
   7   5  -4 10126.2 933.073   7
  -6   5   4 4576.25 1777.27   0
   6   5  -4 6154.92 781.059   7
  -5   5   4 18736.0 980.158   7
  -5   5   4 22383.3 2929.26   0
   5   5  -4 20880.9 1145.31   7
  -4   5   4 8074.51 2133.66   0
   4   5  -4 7143.88 731.001   7
  -4   5   4 7065.54 658.427   7
  -3   5   4 11759.9 2338.92   0
   3   5  -4 11233.7 807.570   7
  -3   5   4 10430.0 754.125   7
  -2   5   4-248.318 1806.53   0
  -2   5   4 779.185 406.838   7
   2   5  -4 1045.87 458.760   7
  -1   5   4 15854.7 2662.01   0
  -1   5   4 11004.8 781.409   7
   0   5   4 4519.49 1930.15   0
   0   5   4 3931.86 549.134   7
   1   5   4 5861.34 655.552   7
   1   5   4 2863.02 1860.17   0
   2   5   4 12733.8 906.375   7
   3   5   4 218.716 536.757   7
   4   5   4 43576.6 1618.24   7
   5   5   4 4193.70 733.116   7
   6   5   4 301.342 611.637   7
   7   5   4 6369.97 924.262   7
   7   5   4 4973.98 1050.04   9
   8   5   4 374.744 786.611   9
   8   5   4 44.7881 693.990   7
   9   5   4 4966.42 766.337   1
   9   5   4 4818.65 867.159   9
   9   5   4 4311.84 838.183   7
  10   5   4 55.0116 620.384   7
  10   5   4-166.573 623.951   9
  10   5   4 162.044 669.148   1
 -10   5  -4 159.864 872.223   4
  11   5   4 4022.03 697.830   7
 -11   5  -4 3604.45 952.257   4
  11   5   4 4176.70 747.000   9
  11   5   4 4018.59 705.735   1
  12   5   4 7738.06 793.854   9
 -12   5  -4 6410.53 978.651   4
  13   5   4 15255.3 930.633   9
 -13   5  -4 13833.2 1131.57   4
  14   5   4 3388.13 534.850   9
 -14   5  -4 2637.03 735.251   4
 -15   5  -4 1387.17 583.385   4
  15   5   4 2870.42 417.449  11
 -16   5  -4-78.7178 443.713   4
 -15   6   4 286.562 407.656   4
 -14   6   4 35847.3 1174.40   4
 -13   6   4 2147.64 635.192   4
 -12   6   4 54787.7 1742.19   4
 -11   6   4 30540.8 1455.64   4
 -10   6   4 45511.1 1776.99   4
  -9   6   4 103132. 2781.01  13
   9   6  -4 96946.1 2462.94   7
  -8   6   4 1770.01 950.494  13
  -8   6   4 2269.12 737.053   4
   8   6  -4 2137.44 690.421   7
   7   6  -4 121858. 2754.26   7
  -7   6   4 123842. 2635.29   4
  -6   6   4 43076.0 1582.82   4
  -6   6   4 47123.5 2142.41  13
   6   6  -4 42662.2 1672.02   7
  -5   6   4 125646. 3734.05   3
   5   6  -4 126685. 2882.21  15
  -5   6   4 124082. 2515.82   4
   5   6  -4 129977. 2722.56   7
  -4   6   4 128743. 2514.99   4
  -4   6   4 142996. 3375.88  13
   4   6  -4 139847. 2690.35   7
  -4   6   4 129824. 2569.13   7
   4   6  -4 132736. 3108.79  15
  -3   6   4 10681.5 1155.81  13
  -3   6   4 11479.2 1513.65   3
  -3   6   4 8652.99 858.229   4
  -3   6   4 8598.27 775.922   7
   3   6  -4 11838.5 1382.09  15
  -2   6   4 187025. 2935.89   4
  -2   6   4 187230. 3083.66   7
   2   6  -4 193019. 4062.39  15
  -1   6   4 553.128 815.189  13
  -1   6   4 763.224 502.400   7
  -1   6   4 71.2542 620.341   4
  -1   6   4 1163.19 1088.79   3
   0   6   4 175094. 4853.66   3
   0   6   4 156829. 2928.43   7
   1   6   4 54193.3 1706.13   4
   1   6   4 58759.7 1845.90   7
  -1   6  -4 51954.6 2392.46  15
   2   6   4 53682.9 1705.05   4
   2   6   4 57773.3 1878.99  11
   2   6   4 62205.9 2799.54   3
   2   6   4 55648.2 1843.55   7
  -2   6  -4 56297.6 2357.39  15
   3   6   4 172014. 3898.00   9
   3   6   4 172691. 3244.09  11
   3   6   4 157557. 2749.37   4
   3   6   4 163076. 3169.62   7
  -3   6  -4 154935. 3605.30  15
   4   6   4 13945.5 1393.90   9
   4   6   4 15478.8 1125.46  11
   4   6   4 12837.8 1042.76   7
   4   6   4 16285.6 1490.91   3
  -4   6  -4 10665.3 1298.88  15
   5   6   4 122902. 3291.72   9
   5   6   4 117497. 2812.26  11
   5   6   4 113598. 2800.76   7
  -5   6  -4 120037. 2919.92  15
   6   6   4 36406.8 1813.00   9
   6   6   4 38316.2 1682.10  11
   6   6   4 33768.7 1653.35   7
   7   6   4 111717. 2817.27  11
   7   6   4 115156. 2883.35   9
   7   6   4 111281. 2901.60   7
   8   6   4 72569.5 2221.44   9
   8   6   4 72349.5 2304.01  11
   9   6   4 12654.5 1016.42   9
   9   6   4 12690.9 1045.20  11
  10   6   4 99954.2 2345.19   9
  10   6   4 107191. 2533.09  11
  11   6   4 339.369 471.368  11
 -11   6  -4 1065.36 726.291   4
  11   6   4 251.542 503.711   9
  12   6   4 82360.3 1878.04  11
 -12   6  -4 78129.3 1897.66   4
  12   6   4 81032.8 1856.37   9
  13   6   4 19140.2 884.507   9
  13   6   4 20444.6 890.137  11
  14   6   4 40253.2 1025.27  11
 -13   7   4 3853.02 500.137   4
 -12   7   4 919.562 511.888   4
 -11   7   4 3826.46 657.973   4
 -10   7   4 36695.3 1392.27   4
  -9   7   4 8968.37 889.904   4
  -8   7   4 11704.9 954.161   4
  -7   7   4 4825.45 742.167   4
  -6   7   4 43363.3 1952.74  15
  -6   7   4 39749.1 1520.74   4
  -5   7   4 5596.81 1097.71  15
  -5   7   4 6330.58 815.323   4
  -4   7   4 10005.6 1341.81  15
  -4   7   4 8656.38 854.088   4
  -3   7   4 28582.3 1292.18   4
  -3   7   4 29648.7 1338.38   7
  -2   7   4 251.389 630.108   4
  -2   7   4 526.922 579.081   7
  -1   7   4 10738.2 991.850   4
  -1   7   4 7855.76 795.906   7
   0   7   4 9835.42 997.885   4
   0   7   4 6705.30 822.674   7
   1   7   4 8482.39 870.751  11
   1   7   4 7721.99 904.086   7
   1   7   4 15950.3 1126.97   4
  -1   7  -4 17246.3 1684.39  15
   2   7   4 15065.7 1071.56  11
   2   7   4 27721.5 1417.97   4
   2   7   4 15743.7 1133.08   7
  -2   7  -4 24597.7 1778.78  15
   3   7   4 1718.42 619.181  11
   3   7   4 2585.60 700.565   7
   4   7   4 28303.9 1532.65   9
   4   7   4 23713.0 1348.17   7
   4   7   4 25558.7 1367.96  11
   4   7   4 22948.3 1534.24  15
   5   7   4 34.0057 580.923  11
   5   7   4-202.756 758.341  15
   5   7   4 433.036 658.682   9
   6   7   4 10266.0 962.304  11
   6   7   4 10047.4 948.154   9
   7   7   4 13042.2 1056.95  11
   7   7   4 14852.4 1033.22   9
   8   7   4 13796.9 1027.87  11
   8   7   4 13033.2 929.725   9
   9   7   4 5592.60 697.512  11
   9   7   4 4707.72 642.154   9
  10   7   4 623.295 425.419  11
  10   7   4 77.7185 421.081   9
  11   7   4 23841.7 966.917  11
  11   7   4 20394.4 879.327   9
  12   7   4 1309.97 364.719  11
 -10   8   4 10164.2 712.505   4
  -9   8   4 48878.8 1347.89   4
  -8   8   4 7262.16 761.467   4
  -7   8   4 59252.3 1623.77   4
  -6   8   4 34735.3 1339.54   4
  -6   8   4 36655.2 1413.23  15
  -5   8   4 13657.6 973.792   4
  -5   8   4 14318.7 1130.76  15
  -4   8   4 74380.9 1845.51   4
  -4   8   4 76803.3 2392.12  15
  -3   8   4 3518.58 946.342  15
  -3   8   4 7298.34 851.551   4
  -2   8   4 85887.4 2706.44  15
  -2   8   4 88306.0 1955.10   4
  -1   8   4 16336.9 1087.68   4
  -1   8   4 3543.42 968.500  15
   0   8   4 65707.1 1751.00   4
   0   8   4 49610.6 2170.54  15
   1   8   4 16372.4 1379.65  15
   2   8   4 25867.9 1519.74  15
   3   8   4 61775.3 2072.40  15
   4   8   4 395.258 631.046  15
   5   8   4 90343.3 2159.53  11
   5   8   4 89226.3 2106.48  15
   6   8   4 9956.44 753.116   9
   6   8   4 9757.88 816.674  11
   7   8   4 24136.0 1116.69  11
   7   8   4 23771.6 928.788   9
   8   8   4 44400.1 1134.40   9
   8   8   4 43001.9 1297.52  11
   9   8   4 12473.4 682.143  11
  -4   9   4 7268.45 750.724  15
  -3   9   4 26686.8 1089.13  15
  -2   9   4 2972.29 651.409  15
  -1   9   4 13348.7 940.203  15
   0   9   4 13049.7 908.408  15
   1   9   4 9520.96 799.960  15
   2   9   4 9910.40 771.130  15
   3   9   4 3886.69 566.192  15
   4   9   4 19770.0 831.311  15
  19   0  -5 268.404 329.040  14
  18   0  -5-41.1723 375.925  14
  17   0  -5 123.160 418.003  14
  16   0  -5-44.0963 461.390  14
  15   0  -5 120.145 465.954  14
  14   0  -5 28.8462 534.726  14
  13   0  -5 49.0638 584.453  14
  13   0  -5 101.137 422.276   1
  12   0  -5 60.8090 484.475   1
  11   0  -5 128.122 524.787   1
  10   0  -5 632.898 712.425   1
   9   0  -5-212.844 981.855   1
  -8   0   5-122.073 758.915   8
  -7   0   5 94.0471 660.137   8
  -6   0   5 126.135 545.082   8
  -5   0   5-38.7752 452.213   8
  -4   0   5 503.912 805.181   6
  -4   0   5 465.727 407.773   8
  -3   0   5 186.679 597.114   6
  -3   0   5 14.3214 343.329   8
  -2   0   5 189.885 531.707   6
  -2   0   5 162.238 332.404   8
   2   0  -5 101.138 367.210   5
   1   0  -5 155.404 335.109   5
   0   0  -5 515.908 357.204   5
   1   0   5 759.118 387.750   5
   2   0   5 8.92724 400.345   5
   2   0   5 29.7913 228.013   1
   3   0   5 197.543 267.931   6
   3   0   5 5.21249 240.065   1
   4   0   5 210.405 273.331   1
   4   0   5 325.875 307.626   6
   5   0   5 103.947 446.938   6
   5   0   5 128.481 295.037   1
   6   0   5-104.860 347.868   1
   7   0   5 380.095 458.950   1
   8   0   5 51.5042 493.505   1
   9   0   5-150.566 535.106   1
  10   0   5-60.0054 490.943   1
  11   0   5 155.260 476.460   1
  12   0   5 534.515 496.827   1
  13   0   5 206.117 545.231   2
  13   0   5 778.917 497.218   1
  14   0   5 229.953 506.456   2
  15   0   5 185.246 473.064   2
  15   0   5 218.799 558.614  12
  16   0   5 79.1879 438.847   2
  16   0   5-140.595 513.486  12
  17   0   5 242.725 369.131   2
  18   0   5 306.893 310.270   2
  18   0   5 168.186 379.799  14
  19   0   5-7.81977 284.998  14
  19   1  -5 2438.34 390.952  14
  19  -1  -5 2317.01 399.879  14
  18  -1  -5 79206.0 1582.24  14
  18   1  -5 75122.0 1528.08  14
  17   1  -5 5264.03 577.367  14
  17  -1  -5 5747.52 615.637  14
  16  -1  -5 65250.6 1746.37  14
  16   1  -5 58023.3 1639.78  14
  15   1  -5 92492.2 2142.71  14
  15  -1  -5 99502.5 2254.04  14
  15   1  -5 99449.5 2196.96   1
  14   1  -5 41116.8 1526.02  14
  14  -1  -5 45631.2 1620.91  14
  14   1  -5 41614.8 1517.78   1
  13  -1  -5 182378. 3149.27  14
  13   1  -5 175632. 3081.21  14
  13   1  -5 173601. 3094.81   1
  12   1  -5 685.421 513.870   1
  11   1  -5 249962. 4128.90   1
  10   1  -5 93253.9 2867.89   1
  -9  -1   5 151596. 3138.48   8
   9   1  -5 148665. 4286.19   1
   8   1  -5 168779. 3800.62   1
  -8  -1   5 148385. 2739.81   8
  -7  -1   5 3522.74 673.638   8
  -7   1   5 2628.23 943.863   8
  -6  -1   5 297800. 3003.93   8
  -6   1   5 293723. 3760.89   8
  -5   1   5 633.106 626.379   8
  -5  -1   5 1640.15 422.797   8
  -4  -1   5 483328. 3119.43   8
  -4   1   5 485654. 3677.95   8
  -3   1   5 270423. 4590.98   6
   3   1  -5 270590. 2882.46   5
   3  -1  -5 270711. 3302.36   5
  -3  -1   5 263734. 2116.61   8
  -3   1   5 269875. 2412.41   8
  -2  -1   5 70567.3 1072.56   8
  -2   1   5 75288.7 2249.73   6
   2   1  -5 77336.3 1435.62   5
   2  -1  -5 72053.9 1650.13   5
  -2   1   5 76940.8 1203.16   7
   1  -1  -5 544646. 4274.49   5
   1   1  -5 506985. 3493.12   5
  -1  -1   5 525728. 2743.85   8
  -1   1   5 491874. 4951.66   6
  -1   1   5 538563. 2872.40   7
   0  -1  -5 11031.5 697.853   5
   0   1   5 10218.8 725.435   6
   1   1   5 129760. 1747.15   6
   1   1   5 131436. 2218.59   5
   1   1   5 131143. 1407.36   1
   1  -1   5 131655. 1867.15   5
   2   1   5 132198. 2312.55   5
   2   1   5 136627. 1524.26   1
   2  -1   5 132809. 2027.74   5
   2   1   5 128693. 1380.78   6
   2  -1   5 130479. 1377.83   1
   3  -1   5 392476. 3829.54   5
   3   1   5 387396. 2324.24   6
   3   1   5 384493. 2756.24   1
   3  -1   5 396436. 4039.41   6
   3  -1   5 395625. 2458.10   1
   4   1   5 391952. 3077.79   1
   4  -1   5 394356. 2600.69   1
   5   1   5 149062. 2134.34   1
   5  -1   5 153868. 1774.70   1
   6   1   5 391337. 3960.84   1
   6  -1   5 405824. 3192.14   1
   7  -1   5 9115.78 608.120   1
   7   1   5 6091.37 775.551   1
   8   1   5 324903. 5003.25   1
   8  -1   5 382866. 3833.80   1
   9   1   5 21331.5 1348.07   1
   9  -1   5 23492.3 1100.04   1
  10   1   5 165498. 3298.26   1
  11   1   5 142409. 2987.03   1
  12   1   5 5572.45 721.072   1
  13   1   5 127560. 2564.02  12
  13   1   5 130243. 2741.73   1
  13   1   5 135336. 2871.05   2
  14  -1   5 9196.27 812.544   2
  14   1   5 8694.32 801.804   1
  14   1   5 8428.50 851.840  12
  14   1   5 9020.21 868.897   2
  15  -1   5 87659.8 2000.33   2
  15   1   5 88463.6 2038.24  12
  15   1   5 84603.0 2123.61   2
  16   1   5 46539.1 1435.80  12
  16  -1   5 50028.8 1513.22  12
  16   1   5 45798.2 1493.62   2
  17   1   5 45014.5 1339.27   2
  18  -1   5 71641.6 1463.47  14
  18   1   5 64758.8 1372.09   2
  19  -1   5 912.264 319.814  14
  19  -2  -5 71.4059 280.396  14
  19   2  -5 79.0770 288.781  14
 -18   2   5 1747.12 535.387   4
  18   2  -5 1745.82 388.274  14
  18  -2  -5 1809.21 391.477  14
  17   2  -5 519.234 402.539  14
  17  -2  -5 345.598 425.094  14
  16   2  -5 177.988 433.252  14
  16  -2  -5 91.7518 474.699  14
  15   2  -5 1915.75 560.093  14
  15  -2  -5 2031.33 607.891  14
  14   2  -5 1668.27 585.008  14
  14   2  -5 1752.98 545.070   1
  14  -2  -5 1739.46 616.361  14
  13   2  -5 28379.5 1318.67  14
  13  -2  -5 31261.3 1384.29  14
  13   2  -5 29263.4 1347.42   1
  12   2  -5 1905.24 666.129  14
  12  -2  -5 1146.16 745.879  14
  12   2  -5 981.643 493.851   1
  11   2  -5 3456.70 719.010   1
  10   2  -5 4911.75 852.076   1
  -9  -2   5 3862.43 915.589   8
   9   2  -5 4239.99 960.233   1
  -8   2   5 1093.00 1919.78   0
  -8  -2   5-16.9085 596.683   8
   8   2  -5 450.401 1001.27   1
  -7  -2   5 17299.7 953.603   8
  -6  -2   5 117.915 420.708   8
  -5  -2   5 1542.05 400.159   8
   4  -2  -5 4954.50 1141.84   6
  -4  -2   5 5975.57 492.656   8
  -4   2   5 6713.76 1000.76   8
  -3   2   5 4385.09 789.367   8
   3  -2  -5 3613.23 823.977   6
  -3   2   5 5120.45 837.289   6
  -3  -2   5 4459.91 418.443   8
  -3   2   5 4481.52 441.025   7
   2   2  -5 12397.7 517.669   5
   2  -2  -5 9299.73 805.794   6
  -2  -2   5 10527.3 508.917   8
  -2   2   5 11194.0 570.022   7
  -2   2   5 7942.44 668.533   6
   1  -2  -5 3924.97 548.558   5
  -1   2   5 2740.85 350.084   6
  -1  -2   5 4325.85 412.156   8
  -1   2   5 4266.58 400.762   7
   0   2   5 1603.87 204.902   6
   0  -2  -5 1392.27 458.269   5
   0   2   5 1292.58 271.382   1
   0   2   5 1271.62 331.561   7
   1   2   5 440.897 310.125   7
   1   2   5 326.077 245.063   1
   2  -2   5 9098.91 545.902   5
   2   2   5 9662.94 505.156   1
   2   2   5 8863.03 519.796   7
   3   2   5 2182.56 396.335   7
   3   2   5 1727.72 364.442   1
   4   2   5 15607.1 744.205   1
   4   2   5 16315.6 739.302   7
   5   2   5 801.794 427.484   1
   5   2   5 840.574 441.007   7
   6   2   5 1379.46 533.170   1
   6   2   5 1102.08 499.605   7
   7   2   5 4982.80 844.371   1
   8   2   5 250.982 852.450   1
   9   2   5 980.644 724.746   1
  10   2   5 1289.03 624.616   1
  11   2   5 14105.2 1093.28   1
  12   2   5 713.260 553.321   1
  12   2   5 371.378 652.960   2
  12   2   5 812.248 602.010  12
  13   2   5 1187.76 552.992   2
  13   2   5 1038.21 507.755   1
  13   2   5 1597.68 633.432  12
  14   2   5 236.588 562.442   2
  14   2   5 32.9085 524.291  12
  14   2   5-54.1908 488.982   1
  15   2   5 8148.69 772.823  12
  15   2   5 7755.73 764.525   2
  16   2   5 488.843 449.167   2
  17   2   5 187.817 380.232   2
  18   2   5 1303.48 363.514   2
  19  -2   5 367.894 269.393  14
  18   3  -5 61323.3 1088.08  14
 -18   3   5 47843.9 1127.50   4
 -17  -3   5 8611.81 595.184  10
 -17   3   5 6988.16 767.688   4
  17   3  -5 7290.99 563.851  14
  16   3  -5 79532.3 1681.40  14
 -16   3   5 74490.1 2039.65   4
  15   3  -5 54245.0 1539.01  14
 -15   3   5 54698.4 1977.37   4
  14   3  -5 21341.6 1107.50  14
  14   3  -5 19959.3 1095.09   1
  13   3  -5 154512. 2835.68  14
  13   3  -5 142498. 2833.22   1
  12   3  -5 9723.58 940.198  14
  12   3  -5 7364.27 772.873   1
  11   3  -5 87793.3 2272.90  14
  11   3  -5 77486.9 2173.19   1
  10   3  -5 33929.9 1557.37   1
   9   3  -5 107155. 2811.33   1
  -9   3   5 107314. 5268.31   0
   8   3  -5 116971. 3215.40   1
  -8   3   5 128706. 6256.36   0
  -7   3   5 92543.2 6042.12   0
   7   3  -5 70997.0 2935.75   1
  -6   3   5 278585. 9935.41   0
   6   3  -5 271996. 5214.73   1
  -5  -3   5 2876.87 421.725   8
  -4  -3   5 248467. 2433.13   8
  -4   3   5 223022. 2672.80   7
  -3  -3   5 38226.5 934.727   8
  -3   3   5 36575.4 1045.03   7
  -2  -3   5 116275. 1530.51   8
  -2   3   5 112389. 1757.39   7
  -1  -3   5 417941. 2879.08   8
  -1   3   5 419869. 3340.21   7
   0  -3   5 1485.87 339.169   8
   0   3   5 2746.81 425.634   7
   1   3   5 523493. 3124.87   1
   1   3   5 488173. 3752.44   7
   2   3   5 103616. 1541.90   1
   2   3   5 103950. 1808.99   7
   3   3   5 98452.7 1642.76   1
   3   3   5 94805.8 1803.54   7
   4   3   5 94519.3 1756.34   1
   4   3   5 91974.0 1861.69   7
   5   3   5 58049.7 1564.93   1
   5   3   5 57227.5 1610.70   7
   6   3   5 157968. 2864.41   1
   6   3   5 168883. 2930.98   7
   7   3   5 2677.51 690.848   1
   7   3   5 3148.82 717.414   7
   8   3   5 238236. 4237.81   7
   8   3   5 224741. 4353.50   1
   9   3   5 63518.3 2314.30   1
  10   3   5 79188.5 2429.56   1
  11   3   5 85523.9 2219.12  12
  11   3   5 87903.9 2458.34   1
  11   3   5 94278.6 2458.56   9
  11   3   5 94071.0 2445.17   2
  12   3   5 24237.0 1281.52  12
  12   3   5 27105.9 1338.21   9
  12   3   5 24060.7 1295.70   1
  12   3   5 25037.0 1320.19   2
  13   3   5 134308. 2793.43   1
  13   3   5 130046. 2716.92   2
  14   3   5 3437.98 620.030   2
  15   3   5 46080.0 1480.84   2
  16   3   5 29122.1 1103.24   2
  17   3   5 29172.7 966.479   2
 -17   3  -5 23776.5 1077.42   4
 -18   3  -5 11006.4 631.944   4
  18   3   5 33173.5 842.384   2
 -17   4   5 2895.07 517.786   4
 -17  -4   5 4124.34 452.543  10
 -16   4   5 630.156 585.144   4
  15   4  -5 1041.78 473.277  14
 -15   4   5 815.564 693.218   4
  14   4  -5 7143.79 707.379  14
 -14   4   5 5864.79 958.070   4
 -13   4   5 408.252 854.454   4
  13   4  -5 196.616 559.808  14
  12   4  -5 4294.65 731.556  14
 -12   4   5 6238.03 1080.30   4
  12   4  -5 7036.43 735.983   1
 -11   4   5-409.990 873.918   4
  11   4  -5 95.3775 644.675  14
  11   4  -5-83.2968 465.749   1
 -10   4   5 657.460 1169.16  13
  10   4  -5 1718.37 546.286   1
 -10   4   5 2059.00 1008.05   4
  10   4  -5 1523.27 708.731  14
  -9   4   5-1288.04 2171.55   0
   9   4  -5 295.208 495.180   1
  -8   4   5 7366.31 1906.92   0
   8   4  -5 6895.99 812.162   1
  -7   4   5 14381.7 2451.93   0
   7   4  -5 11530.9 1032.21   1
  -6   4   5 2702.21 1877.30   0
   6   4  -5 1946.42 732.283   1
  -5   4   5 3017.70 509.680   7
   5   4  -5 3673.93 913.769   1
  -5   4   5 3871.93 2145.09   0
   4   4  -5 4239.09 1149.08   1
  -4   4   5 3308.43 502.920   7
  -3   4   5 41364.5 1265.09   7
  -3   4   5 47854.4 5040.21   0
  -2   4   5 191.827 349.615   7
  -2   4   5-1377.96 2345.00   0
   2   4  -5 865.500 433.095   7
  -1   4   5 19478.3 3349.68   0
  -1   4   5 22480.1 954.150   7
   0   4   5 59160.3 5172.17   0
   0  -4   5 61250.3 1228.44   8
   0   4   5 63591.9 1548.85   7
   1   4   5 2952.02 1821.60   0
   1   4   5 2158.42 459.035   7
   2   4   5 9536.45 734.255   7
   2   4   5 12851.2 2533.45   0
   3   4   5 21991.2 1067.86   7
   4   4   5 12367.0 742.969   1
   4   4   5 11922.7 873.769   7
   5   4   5 12218.7 814.192   1
   5   4   5 11747.6 930.793   7
   6   4   5 1955.29 535.793   1
   6   4   5 2944.93 678.885   7
   7   4   5 19234.8 1199.80   1
   7   4   5 17533.5 1249.95   7
   8   4   5 4798.50 833.835   1
   8   4   5 5652.26 1001.03   7
   9   4   5 17564.1 1304.03   1
   9   4   5 20141.4 1531.17   9
   9   4   5 18978.9 1285.20   7
  10   4   5 7877.90 1024.62   9
  10   4   5 8586.75 934.513   1
  10   4   5 8145.67 892.869   2
  11   4   5 6342.98 877.797   9
  11   4   5 5602.32 781.076   1
  12   4   5 14660.2 1028.34   1
 -12   4  -5 14802.1 1308.06   4
  12   4   5 14169.1 1040.76   9
  12   4   5 14349.3 980.151   2
 -13   4  -5 820.448 880.180   4
  13   4   5 1070.77 525.617   2
  13   4   5 1426.06 546.292   9
 -14   4  -5 10214.1 1111.53   4
  14   4   5 10306.7 759.570   9
  14   4   5 9294.69 742.964   2
  15   4   5 1121.55 408.256   2
 -15   4  -5 868.533 697.527   4
  16   4   5 1524.40 391.491   2
 -16   4  -5 1033.82 573.811   4
  17   4   5 326.630 277.172   2
 -16   5   5 41977.8 1073.49   4
 -15   5   5 34852.6 1209.55   4
 -14   5   5 24068.7 1214.19   4
 -13   5   5 84566.4 2234.90   4
 -12   5   5 454.607 737.967   4
 -11   5   5 138874. 3149.33   4
  11   5  -5 136892. 2800.77   7
  11   5  -5 143338. 2613.86   1
 -10   5   5 16133.4 1262.57   4
  10   5  -5 16082.9 1115.69   7
  10   5  -5 15388.0 982.341   1
  -9   5   5 92551.9 2545.85   4
   9   5  -5 83517.6 2308.51   7
  -8   5   5 96071.9 2468.17   4
  -8   5   5 93240.0 2953.48  13
  -7   5   5 19518.6 1232.91   4
   7   5  -5 19594.5 1237.79   7
  -6   5   5 172231. 7500.66   0
   6   5  -5 163693. 3104.22   7
  -5   5   5 655.110 456.552   7
  -5   5   5 1761.21 1975.71   0
   5   5  -5 936.080 563.410   7
   4   5  -5 106513. 2294.22   7
  -4   5   5 97554.3 2166.70   7
  -4   5   5 100975. 6280.60   0
   3   5  -5 79766.4 1881.17   7
  -3   5   5 75088.4 5476.82   0
  -3   5   5 67132.3 1782.90   7
  -2   5   5 101047. 6456.76   0
  -2   5   5 92694.9 2062.90   7
  -1   5   5 206594. 9006.22   0
  -1   5   5 189330. 2963.55   7
   0   5   5 3177.01 2289.41   0
   0   5   5 4861.94 631.720   7
   1   5   5 313720. 3924.83   7
   1   5   5 208652. 8176.74   0
   2   5   5 23514.1 1187.99   7
   3   5   5 176882. 3121.71   7
   4   5   5 64202.7 2005.02   7
   5   5   5 70961.3 2204.71   7
   6   5   5 107643. 2816.67   7
   7   5   5 1439.25 963.989   9
   7   5   5 157.127 719.092   7
   8   5   5 161305. 3703.68   9
   8   5   5 173393. 3784.61   7
   9   5   5 12617.8 1182.39   9
   9   5   5 14557.2 1169.98   7
  10   5   5 59219.6 1985.32   1
  10   5   5 55936.4 1989.48   9
  11   5   5 98595.7 2425.05   9
  12   5   5 24143.4 1200.91   9
  13   5   5 108653. 2189.94   9
  14   5   5 5237.59 568.281   9
  15   5   5 58815.2 1280.92  11
 -14   6   5 6849.48 619.787   4
 -13   6   5 761.544 537.077   4
 -12   6   5 15019.7 994.819   4
 -11   6   5 2447.94 733.236   4
 -10   6   5 25809.1 1494.09  13
 -10   6   5 23201.0 1339.55   4
  -9   6   5 4739.56 1049.20  13
  -9   6   5 4858.75 834.653   4
  -8   6   5 10921.9 985.390   4
  -8   6   5 12305.0 1287.64  13
   8   6  -5 12187.8 1050.13   7
  -7   6   5 5421.34 1147.41  13
  -7   6   5 4308.80 768.334   4
   7   6  -5 2971.43 666.569   7
  -6   6   5 782.012 1005.02  13
  -6   6   5 544.741 596.707   4
  -6   6   5 432.787 1048.48   3
   6   6  -5 553.061 588.965   7
  -5   6   5 18830.6 1138.10   4
  -5   6   5 11516.9 1434.50   3
  -5   6   5 22281.1 1576.55  13
   5   6  -5 13534.6 981.211   7
  -4   6   5 1920.36 629.535   4
  -4   6   5 2525.78 1121.81   3
  -4   6   5 1435.91 548.814   7
  -4   6   5 2953.47 1023.16  13
  -3   6   5 15079.9 1321.00  13
  -3   6   5 12802.9 1604.85   3
  -3   6   5 12997.2 948.976   4
  -3   6   5 11257.6 884.801   7
   3   6  -5 16818.3 1563.23  15
  -2   6   5 26402.2 1559.60  13
  -2   6   5 29291.6 2246.95   3
  -2   6   5 23422.3 1150.62   4
   2   6  -5 29938.1 2008.17  15
  -2   6   5 23699.2 1209.46   7
  -1   6   5 535.682 773.606  13
  -1   6   5 614.428 591.388  11
  -1   6   5 83.1089 479.902   7
  -1   6   5 315.454 573.910   4
  -1   6   5-221.392 1110.53   3
   0   6   5 44539.4 1790.91  13
   0   6   5 38975.6 1504.92   4
   0   6   5 44234.5 1568.82  11
   0   6   5 44766.0 2662.07   3
   0   6   5 42399.0 1590.58   7
   0   6  -5 42854.8 2613.75  15
   1   6   5 12773.4 1130.07  13
   1   6   5 10351.3 1037.56   4
   1   6   5 14560.4 1686.93   3
   1   6   5 12372.9 986.934  11
   1   6   5 10918.3 946.952   7
  -1   6  -5 15552.1 1887.57  15
   2   6   5 66325.2 1853.09   4
   2   6   5 73927.0 2076.57  11
   2   6   5 61315.8 2495.15   9
   2   6   5 79841.2 3235.93   3
  -2   6  -5 63525.1 2603.22  15
   2   6   5 68563.7 2082.86   7
   3   6   5 18832.4 1271.62   4
  -3   6  -5 16870.6 1667.10  15
   3   6   5 9432.70 1327.34   9
   3   6   5 10487.0 979.547  11
   3   6   5 10949.8 1456.77   3
   3   6   5 9803.62 943.698   7
   4   6   5 632.583 613.973  11
   4   6   5 215.227 966.586   9
   4   6   5 32.0067 913.469   3
   4   6   5 452.031 604.111   7
   5   6   5 53269.1 1944.54  11
   5   6   5 55856.1 2378.93   3
   5   6   5 51117.6 2246.70   9
   5   6   5 52880.0 2002.53   7
   6   6   5 6210.41 1043.93   9
   6   6   5 5673.96 830.498  11
   6   6   5 6198.55 948.414   7
   7   6   5 11705.8 1033.81  11
   7   6   5 11591.9 1164.33   9
   7   6   5 12970.0 1220.27   7
   8   6   5 125.800 597.149  11
   8   6   5 329.643 639.572   9
   8   6   5 212.455 762.144   7
   9   6   5 10911.0 980.262  11
   9   6   5 10145.7 955.803   9
  10   6   5 13973.4 1001.30  11
  10   6   5 13789.5 1010.48   9
  11   6   5 3172.33 589.882  11
  11   6   5 3782.91 641.574   9
  12   6   5 9102.90 710.738  11
  12   6   5 9460.81 747.464   9
  13   6   5 1401.02 388.637  11
  13   6   5 1362.42 434.353   9
  14   6   5 9490.65 541.878  11
 -12   7   5 5069.58 605.688   4
 -11   7   5 60025.9 1529.05   4
 -10   7   5 31522.2 1286.39   4
  -9   7   5 45891.9 1570.22   4
  -8   7   5 53878.0 1704.93   4
  -7   7   5 1705.46 939.885  13
  -7   7   5 443.467 631.928   4
  -6   7   5 93894.6 2801.53  13
  -6   7   5 90983.7 2177.34   4
  -5   7   5 13768.4 1352.29  13
  -5   7   5 13434.4 983.222   4
  -5   7   5 14813.2 1442.59  15
  -4   7   5 112837. 3070.06  13
  -4   7   5 108784. 2360.76   4
  -3   7   5 57277.5 1741.13   4
  -3   7   5 62576.5 1910.07   7
  -2   7   5 40471.3 1564.21   4
  -2   7   5 35494.4 1448.41   7
  -1   7   5 114407. 3841.07   3
  -1   7   5 115092. 2567.62   7
   0   7   5 7728.40 1305.24   3
   0   7   5 7228.23 850.329   7
   1   7   5 94692.4 2206.12   4
   1   7   5 95261.7 2324.93  11
   1   7   5 95910.5 3422.16   3
   1   7   5 91266.5 2420.65   7
   2   7   5 5500.18 770.374  11
   2   7   5 5482.71 843.517   7
   2   7   5 6639.83 1199.95   3
   3   7   5 77212.8 2211.94  11
   3   7   5 76687.2 2280.01   7
   4   7   5 90239.0 2419.58  11
   4   7   5 96847.5 2643.86   9
   5   7   5 18471.4 1234.04   9
   5   7   5 17793.0 1181.15  11
   5   7   5 16180.3 1248.57  15
   6   7   5 94367.0 2464.05  11
   6   7   5 99790.6 2463.22   9
   7   7   5 621.110 563.225  11
   7   7   5 715.820 594.848   9
   8   7   5 77060.9 2143.86  11
   8   7   5 73274.5 1908.87   9
   9   7   5 21925.7 1108.87  11
   9   7   5 21246.8 1033.59   9
  10   7   5 53798.6 1526.98  11
  10   7   5 52688.8 1427.88   9
  11   7   5 79654.4 1638.01  11
  11   7   5 74685.7 1523.28   9
  12   7   5 3764.48 424.007  11
 -10   8   5 6323.82 607.192   4
  -9   8   5 8472.03 766.555   4
  -8   8   5 2655.84 701.169   4
  -7   8   5 6639.09 791.221   4
  -6   8   5 1294.74 662.121   4
  -6   8   5 1555.19 665.230  15
  -5   8   5 17605.7 1030.60   4
  -5   8   5 16606.9 1160.29  15
  -4   8   5-333.607 802.221  15
  -4   8   5 4199.39 743.188   4
  -3   8   5 13075.1 1252.71  15
  -3   8   5 19672.9 1071.18   4
  -2   8   5 24447.1 1182.79   4
  -2   8   5 14060.3 1297.45  15
  -1   8   5 16085.4 1117.61   4
  -1   8   5 1351.28 882.375  15
   0   8   5 9292.81 1139.70  15
   1   8   5-225.932 791.875  15
   2   8   5 16866.4 1287.53  15
   3   8   5 1651.61 728.166  15
   4   8   5 16734.9 1130.92  15
   5   8   5 9798.99 792.298  11
   5   8   5 6628.54 754.242  15
   6   8   5 538.312 471.977  11
   6   8   5 553.361 456.590   9
   7   8   5 20705.0 1008.35  11
   7   8   5 21715.1 872.897   9
   8   8   5 913.451 425.162  11
   8   8   5 882.100 371.794   9
   9   8   5 18317.4 757.486  11
  -3   9   5 17030.9 879.716  15
  -2   9   5 26520.5 1094.24  15
  -1   9   5 48750.2 1469.40  15
   0   9   5 7897.16 771.377  15
   1   9   5 45206.4 1372.50  15
   2   9   5 17803.1 884.114  15
   3   9   5 40646.0 1100.88  15
  19   0  -6 18551.3 693.859  14
  18   0  -6 33962.1 1054.17  14
  17   0  -6 94182.7 1893.96  14
  16   0  -6 2046.92 544.455  14
  15   0  -6 75005.8 1947.49  14
  14   0  -6 14919.6 1013.31  14
  13   0  -6 98744.6 2390.47  14
  13   0  -6 97840.6 2293.00   1
  12   0  -6 70973.5 2134.45   1
  11   0  -6 41059.7 1886.61   1
  10   0  -6 203423. 4939.22   1
  -9   0   6 10317.9 1189.39   8
   9   0  -6 10354.3 1232.53   1
  -8   0   6 237133. 3759.79   8
  -7   0   6 41726.2 1479.70   8
  -6   0   6 145388. 2321.13   8
  -5   0   6 412439. 3461.37   8
  -4   0   6 1966.80 462.042   8
  -3   0   6 445269. 5446.23   6
   3   0  -6 448442. 4315.09   5
   2   0  -6 77626.3 1727.47   5
  -2   0   6 75177.4 1192.63   8
   1   0  -6 191138. 2600.72   5
  -1   0   6 191106. 1760.64   8
   0   0   6 6298.01 452.141   8
   0   0  -6 6414.09 609.956   5
   1   0   6 65819.8 1059.74   8
   1   0   6 67039.6 1638.24   5
   1   0   6 65782.0 1095.98   1
   2   0   6 207772. 1960.08   1
   2   0   6 216104. 2989.22   5
   3   0   6 9079.07 634.826   6
   3   0   6 9832.41 509.983   1
   4   0   6 531176. 4416.98   6
   4   0   6 480547. 3296.29   1
   5   0   6 97801.4 1645.36   1
   6   0   6 218817. 2718.16   1
   7   0   6 161917. 2610.51   1
   8   0   6 81455.5 2104.27   1
   9   0   6 193576. 3574.65   1
  10   0   6 6769.83 808.648   1
  11   0   6 120964. 2718.22   1
  12   0   6 56008.8 1859.64   1
  12   0   6 62173.9 2022.19   2
  13   0   6 6054.39 729.787   1
  13   0   6 6545.87 814.864   2
  14   0   6 77153.6 2088.03   2
  15   0   6 9309.19 875.688  12
  15   0   6 8184.26 808.051   2
  16   0   6 122963. 2279.26  12
  16   0   6 118324. 2229.73   2
  17   0   6 3245.21 541.259  12
  17   0   6 2756.78 472.477   2
  18   0   6 48761.2 1065.68  14
  18   0   6 46791.8 1058.85   2
  19   1  -6 1469.82 341.079  14
  19  -1  -6 907.894 324.043  14
  18   1  -6 3049.37 452.923  14
  18  -1  -6 2559.21 460.356  14
  17   1  -6 273.370 400.240  14
  17  -1  -6 260.421 425.232  14
  16   1  -6 17.0599 445.011  14
  16  -1  -6 588.864 480.848  14
  15   1  -6 9359.75 804.081  14
  15  -1  -6 9783.85 845.367  14
  14   1  -6 2857.42 583.093   1
  14   1  -6 2985.14 639.845  14
  14  -1  -6 3290.26 692.781  14
  13   1  -6 168.847 535.437  14
  13  -1  -6 167.442 624.016  14
  13   1  -6 34.9094 498.117   1
  12   1  -6 1034.46 615.574  14
  12  -1  -6 962.098 738.150  14
  12   1  -6 861.285 568.258   1
  11   1  -6 553.161 664.071   1
  10   1  -6 587.402 907.667   1
  -9  -1   6 3187.35 854.876   8
   9  -1  -6 2902.89 913.248   1
   9   1  -6 2956.12 1109.21   1
  -8  -1   6 7105.57 866.278   8
  -7  -1   6 5033.21 647.268   8
  -7   1   6 4251.57 940.252   8
  -6  -1   6 29535.7 1064.09   8
  -6   1   6 28422.7 1338.37   8
  -5  -1   6 1616.51 437.658   8
  -5   1   6 2491.45 646.357   8
   4   1  -6 13332.2 840.538   5
  -4  -1   6 12518.2 654.166   8
  -4   1   6 13220.3 788.063   8
  -3   1   6 4141.07 926.508   6
   3   1  -6 4205.79 530.490   5
  -3  -1   6 4165.50 446.801   8
  -3   1   6 4170.18 500.621   8
  -2  -1   6 584.492 319.095   8
  -2   1   6 194.663 604.187   6
   2   1  -6 389.605 321.778   5
  -2   1   6 732.020 405.942   8
   1   1  -6 19834.0 840.688   5
  -1  -1   6 20416.7 675.919   8
  -1   1   6 21807.2 693.217   8
  -1   1   6 21059.8 695.284   7
   0   1   6 151.052 242.192   1
   0   1   6 180.190 294.210   7
   0  -1   6 165.166 316.928   8
   1  -1   6 10247.7 672.421   5
   1   1   6 11862.1 700.134   6
   1   1   6 10984.1 508.383   1
   1   1   6 11285.2 499.338   7
   2  -1   6 12318.9 767.227   5
   2   1   6 12128.3 545.995   1
   2  -1   6 11773.7 511.128   1
   2   1   6 13060.3 535.201   7
   3  -1   6 32408.3 1242.85   5
   3  -1   6 29349.8 769.749   1
   3  -1   6 31846.9 1254.48   6
   3   1   6 30836.0 868.877   1
   4   1   6 1129.57 355.875   1
   4  -1   6 1339.42 303.246   1
   5   1   6 43556.0 1231.26   1
   5  -1   6 41984.7 1022.14   1
   6   1   6 5843.53 623.283   1
   6  -1   6 5906.94 499.372   1
   7   1   6 17412.1 1073.94   1
   7  -1   6 19526.5 871.033   1
   8   1   6 16586.0 1242.98   1
   8  -1   6 18408.9 936.279   1
   9   1   6-47.3532 677.195   1
   9  -1   6 451.536 441.383   1
  10   1   6 95.7878 598.499   1
  11   1   6 22494.6 1327.33   1
  12   1   6 1.74549 484.593   1
  12   1   6-234.876 685.906  12
  12   1   6 160.423 638.624   2
  13   1   6 7216.45 782.737   1
  13   1   6 6308.36 795.146  12
  13   1   6 7635.02 851.069   2
  14   1   6 9788.56 900.578  12
  14   1   6 11038.0 870.591   1
  14  -1   6 10704.0 842.624   2
  14   1   6 8833.93 880.264   2
  15   1   6 188.444 515.182   2
  15   1   6 215.618 524.359  12
  16   1   6-50.9444 497.843  12
  16  -1   6 401.787 513.741  12
  16   1   6 201.390 431.541   2
  17   1   6-42.5794 367.907   2
  17   1   6 414.133 466.156  12
  17  -1   6 676.164 448.483  12
  18   1   6 366.733 310.831   2
  18  -1   6 40.8465 361.386  14
  19   2  -6 32229.9 743.314  14
  18   2  -6 20691.9 775.802  14
  18  -2  -6 20609.9 746.276  14
  17  -2  -6 68243.4 1504.07  14
  17   2  -6 66084.6 1485.37  14
  16   2  -6 4341.41 563.704  14
  16  -2  -6 6009.27 653.348  14
 -16  -2   6 6028.98 677.360  10
  15   2  -6 98396.5 2149.20  14
  15  -2  -6 109960. 2264.61  14
  14   2  -6 10278.3 870.169  14
  14  -2  -6 11505.9 943.970  14
  14   2  -6 10093.5 859.457   1
  13   2  -6 81970.6 2188.05  14
  13   2  -6 84891.3 2269.98   1
  12   2  -6 85773.3 2303.11  14
  12   2  -6 83918.2 2358.95   1
  11   2  -6 30521.1 1619.13   1
  10   2  -6 156382. 3889.10   1
  -9  -2   6 2692.69 812.986   8
   9   2  -6 3276.54 1218.94   1
  -8   2   6 228200. 7845.89   0
  -8  -2   6 239997. 3497.35   8
   8   2  -6 238895. 5010.03   1
  -7  -2   6 142908. 2409.50   8
  -6  -2   6 232852. 2768.58   8
  -5  -2   6 179594. 2264.83   8
  -5   2   6 176040. 3323.74   8
  -4  -2   6 14307.9 692.556   8
  -4   2   6 12945.8 1080.82   8
  -3  -2   6 695455. 3855.26   8
  -3   2   6 681513. 4246.29   7
  -2   2   6 1261.58 348.486   7
  -2  -2   6 680.110 358.988   8
  -2   2   6 585.025 552.572   8
  -1  -2   6 298361. 2452.02   8
  -1   2   6 293204. 2593.60   7
   0  -2   6 246774. 2232.90   8
   0   2   6 246567. 2353.54   7
   1   2   6 289960. 2427.71   1
   1   2   6 281373. 2521.01   7
   2   2   6 565514. 3555.18   1
   2   2   6 558378. 3616.76   7
   3   2   6 4531.57 458.207   1
   3   2   6 5418.71 498.463   7
   4   2   6 372322. 3448.09   1
   4   2   6 407834. 3379.67   7
   5   2   6 88567.2 1867.43   1
   5   2   6 99220.9 1840.80   7
   6   2   6 206706. 3224.69   1
   7   2   6 204743. 3751.70   1
   8   2   6 38447.8 2077.28   1
   9   2   6 232283. 5018.51   1
  10   2   6 5437.71 965.828   1
  11   2   6 203579. 3903.89   2
  11   2   6 207402. 3939.53   1
  12   2   6 27678.0 1447.38   1
  12   2   6 27262.2 1295.41  12
  12   2   6 26440.3 1454.77   2
  13   2   6 90820.2 2191.96  12
  13   2   6 95216.8 2451.52   1
  13   2   6 92551.4 2430.26   2
  14   2   6 130204. 2539.71  12
  14   2   6 138923. 2801.18   1
  14   2   6 132972. 2751.94   2
  15   2   6 4814.88 685.209  12
  15   2   6 7232.31 742.923   2
  16   2   6 115597. 2214.37   2
  17  -2   6 8183.90 618.661  12
  17   2   6 7978.67 618.064   2
  18   2   6 51791.3 1126.28   2
  18   3  -6 969.983 304.729  14
  17   3  -6 1120.64 379.748  14
 -17  -3   6 1056.94 414.005  10
  16   3  -6 4248.46 551.325  14
 -16   3   6 2930.17 603.845   4
  15   3  -6 1225.00 506.545  14
 -15   3   6 2936.38 760.835   4
  14   3  -6 6890.95 735.169  14
 -14   3   6 6472.13 1026.09   4
  13   3  -6 9.46571 510.460   1
  13   3  -6-7.19221 534.461  14
 -13   3   6-74.3829 905.370   4
  12   3  -6 2006.53 672.904  14
 -12   3   6 2044.08 1053.28   4
  12   3  -6 2171.86 568.523   1
  11   3  -6 1800.41 787.782  14
  11   3  -6 1884.06 597.524   1
  10   3  -6 1051.66 635.295   1
   9   3  -6 11957.4 1246.18   1
  -9   3   6 12121.3 2371.28   0
   8   3  -6 2488.37 1058.51   1
  -8   3   6 508.860 2359.98   0
  -7   3   6 646.861 2104.04   0
  -7  -3   6 620.995 553.668   8
   7   3  -6 824.058 1003.34   1
  -6  -3   6 24875.9 1025.68   8
  -5  -3   6 2206.39 473.022   8
  -4   3   6 2495.12 467.599   7
  -4  -3   6 3215.39 465.879   8
  -3  -3   6 12055.9 630.131   8
  -3   3   6 11700.5 691.991   7
  -2  -3   6 8611.42 540.073   8
  -2   3   6 8624.29 602.841   7
  -1   3   6 302.002 348.329   7
  -1  -3   6 475.858 345.587   8
   0  -3   6 31415.6 914.050   8
   0   3   6 31311.4 1024.22   7
   1   3   6 5334.34 431.518   1
   1   3   6 4862.34 510.916   7
   2   3   6 4926.55 456.978   1
   2   3   6 4046.45 502.117   7
   3   3   6 19990.5 813.887   1
   3   3   6 18715.1 907.943   7
   4   3   6 4874.18 521.850   1
   4   3   6 5315.68 635.280   7
   5   3   6 10649.8 767.977   1
   5   3   6 10133.2 852.614   7
   6   3   6 1689.04 522.250   1
   6   3   6 2145.77 652.606   7
   7   3   6 5845.80 800.166   1
   7   3   6 4965.25 863.917   7
   8   3   6 1528.71 755.258   1
   9   3   6 369.769 794.098   1
  10   3   6 24825.6 1517.90   1
  10   3   6 20766.2 1246.94  12
  10   3   6 22917.5 1537.79   2
  11   3   6 6212.54 821.977   1
  11   3   6 5657.46 910.302   9
  11   3   6 6403.03 895.653   2
  11   3   6 6774.27 886.826  12
  12   3   6 8783.61 887.406  12
  12   3   6 7640.63 825.000   1
  12   3   6 8929.37 946.125   2
  13   3   6 13343.4 1016.50   1
  13   3   6 12157.9 978.526   2
  14   3   6 5120.67 706.384   2
  15   3   6 4663.15 621.672   2
  16   3   6 858.288 406.355   2
  17   3   6 3587.06 453.868   2
  18   3   6 975.430 271.332   2
 -17  -4   6 54410.8 1020.66  10
  16   4  -6 460.076 343.857  14
 -16   4   6 100.303 477.181   4
  15   4  -6 112588. 1878.86  14
 -15   4   6 94485.5 2095.07   4
  14   4  -6 8470.02 712.475  14
 -14   4   6 7451.01 935.053   4
 -13   4   6 73341.7 2274.17   4
  13   4  -6 78359.1 1950.61  14
  12   4  -6 111337. 2461.84  14
 -12   4   6 105154. 2859.05   4
  12   4  -6 106526. 2399.58   1
 -11   4   6 43659.2 2081.71   4
 -11   4   6 43111.6 1958.23  13
  11   4  -6 40635.1 1558.02   1
 -10   4   6 114500. 3077.17  13
  10   4  -6 97377.6 2403.31  14
   9   4  -6 170.728 741.333  14
  -9   4   6 1870.37 1080.93  13
  -9   4   6 665.332 994.159   4
   9   4  -6 114.145 565.848   1
   8   4  -6 154136. 3371.52   1
  -8   4   6 157283. 7145.73   0
   7   4  -6 63013.8 2342.96   1
  -7   4   6 69070.2 5241.85   0
  -6   4   6 76584.5 5921.71   0
   6   4  -6 72071.3 2753.92   1
  -5   4   6 219387. 10835.1   0
   5   4  -6 199859. 5018.52   1
  -4   4   6 16164.5 3320.98   0
   4   4  -6 17513.6 1592.50   1
  -4   4   6 15626.1 902.344   7
  -3   4   6 146474. 8177.54   0
  -3   4   6 145421. 2437.93   7
  -2   4   6 26124.1 3582.81   0
  -2   4   6 25852.8 1066.26   7
  -1  -4   6 412273. 3273.59   8
  -1   4   6 389408. 3912.17   7
   0  -4   6 356852. 3107.25   8
   0   4   6 349276. 3723.05   7
   1  -4   6 95079.0 1638.33   8
   1   4   6 94682.1 2006.33   7
   2   4   6 406203. 4237.91   7
   3   4   6 9292.93 783.383   7
   4   4   6 234915. 2997.26   1
   4   4   6 232176. 3473.96   7
   5   4   6 45465.1 1464.95   1
   5   4   6 41340.3 1631.70   7
   6   4   6 132914. 2668.95   1
   6   4   6 124022. 2948.18   7
   7   4   6 86028.5 2356.87   1
   7   4   6 84256.0 2665.12   7
   8   4   6 828.379 911.777   7
   8   4   6 2787.58 740.452   1
   9   4   6 109320. 3074.37   1
   9   4   6 108643. 3103.80   9
   9   4   6 114405. 2832.29   2
  10   4   6 1012.24 686.051   2
  10   4   6 1287.61 694.076   9
  10   4   6 3221.12 713.126   1
  11   4   6 130531. 2973.21   1
  11   4   6 124355. 2883.96   9
  12   4   6 38337.2 1593.50   1
  12   4   6 35789.6 1501.89   9
  12   4   6 36029.7 1428.59   2
  13   4   6 66342.9 1815.56   9
  13   4   6 68671.1 1820.67   2
  14   4   6 106840. 1997.48   9
  14   4   6 106898. 2082.10   2
  15   4   6 5362.33 563.123   2
  16   4   6 70457.8 1324.63   2
  17   4   6 12649.4 491.406   2
 -16  -5   6 3209.13 403.777  10
 -15   5   6 1243.99 490.450   4
 -14   5   6 2672.72 654.340   4
 -13   5   6 4023.56 796.844   4
 -12   5   6 6521.41 935.295   4
 -11   5   6 20613.8 1468.02  13
 -11   5   6 18711.1 1324.75   4
  10   5  -6 177.046 604.131   1
 -10   5   6 116.637 1019.47  13
 -10   5   6 161.396 792.107   4
  10   5  -6 180.246 563.637   7
  -9   5   6 7024.34 1189.03  13
  -9   5   6 8022.88 1035.39   4
   9   5  -6 6874.55 868.916   7
  -8   5   6 515.110 1001.41  13
  -8   5   6 823.934 744.123   4
   8   5  -6 743.806 650.386   7
  -7   5   6 228.907 998.078  13
  -7   5   6 641.507 701.959   4
   7   5  -6 589.128 639.669   7
  -6   5   6 2245.85 702.468   4
  -6   5   6 1998.52 1076.45  13
   6   5  -6 1674.78 609.888   7
  -5   5   6 3813.18 2540.68   0
   5   5  -6 5597.29 760.267   7
  -4   5   6 2191.77 552.565   7
   4   5  -6 2163.72 587.605   7
  -3   5   6 8040.68 2648.03   0
  -3   5   6 5194.91 658.642   7
  -2   5   6 16655.5 3585.85   0
  -2   5   6 16340.9 964.229   7
  -1   5   6 9933.58 2822.77   0
  -1   5   6 8611.17 749.961   7
   0   5   6 18993.8 3134.47   0
   0   5   6 25944.4 1203.40   7
   1   5   6 38561.5 4208.70   0
   1   5   6 37613.9 1457.02   7
   2   5   6 41.5485 511.142   7
   3   5   6 8762.58 842.419   7
   4   5   6 862.399 590.590   7
   5   5   6 976.689 674.209   7
   6   5   6 2415.36 814.884   7
   6   5   6 1204.88 846.630   9
   7   5   6 177.440 858.543   7
   8   5   6 798.581 837.354   9
   8   5   6 114.169 830.621   7
   9   5   6 2326.32 796.805   7
   9   5   6 2831.06 902.591   9
  10   5   6 24.4768 667.397   9
  10   5   6 699.143 791.630   1
  11   5   6 766.235 596.534   9
  12   5   6 7376.30 789.683   9
  13   5   6 5771.78 659.764   9
  14   5   6 5836.16 555.679   9
  15   5   6 10877.7 589.870  11
 -14   6   6 3929.35 513.840   4
 -13   6   6 25818.1 1022.53   4
 -12   6   6 44910.9 1445.56   4
 -11   6   6 27692.5 1371.59  13
 -11   6   6 24645.5 1239.78   4
 -10   6   6 72072.7 2241.49  13
 -10   6   6 76587.3 2143.03   4
  -9   6   6 2441.89 920.196  13
  -9   6   6 1533.81 669.024   4
  -8   6   6 116787. 3133.60  13
  -8   6   6 123893. 2661.90   4
  -7   6   6 46942.6 2202.93  13
  -7   6   6 47091.6 1674.56   4
   7   6  -6 46357.9 1729.89   7
  -6   6   6 40374.8 2052.57  13
  -6   6   6 38247.2 2159.04   3
  -6   6   6 38608.9 1509.32   4
   6   6  -6 40613.7 1628.34   7
  -5   6   6 101760. 3025.86  13
  -5   6   6 96247.1 2246.21   4
  -4   6   6 7967.35 838.099   4
  -4   6   6 7690.24 1136.94  13
  -4   6   6 6158.98 1394.38   3
  -4   6   6 5892.59 766.174   7
  -3   6   6 159310. 3483.83  13
  -3   6   6 152494. 4707.21   3
  -3   6   6 137493. 2586.47   4
  -3   6   6 127538. 2776.29   7
  -2   6   6 4446.59 945.679  13
  -2   6   6 3951.90 686.778   4
  -2   6   6 6037.98 1497.64   3
  -2   6   6 3564.89 657.175   7
  -1   6   6 113639. 2774.33  13
  -1   6   6 96637.3 2191.65   4
  -1   6   6 117995. 4302.50   3
  -1   6   6 98707.4 2422.75   7
   0   6   6 26807.6 1452.11  13
   0   6   6 21979.5 1282.21   4
   0   6   6 27820.0 2402.26   3
   0   6   6 23889.2 1260.76   7
   1   6   6 60774.1 1791.82   4
   1   6   6 67566.6 1938.04  11
   1   6   6 71080.3 2160.53  13
   1   6   6 67351.0 3207.47   3
   1   6   6 62127.2 1989.89   7
   2   6   6 107377. 2345.34   4
   2   6   6 77506.9 2119.62  11
   2   6   6 79754.1 2775.78   9
   2   6   6 124550. 4153.12   3
   2   6   6 118243. 2770.61   7
   3   6   6 17386.8 1147.27  11
   3   6   6 18541.6 1711.29   3
   3   6   6 17502.9 1200.79   7
   4   6   6 103356. 2574.26  11
   4   6   6 91074.3 2962.66   9
   4   6   6 105042. 3435.27   3
   4   6   6 93518.1 2590.71   7
   5   6   6 33760.0 1566.21  11
   5   6   6 31580.4 1856.36   9
   5   6   6 36363.3 2035.75   3
   5   6   6 32246.0 1664.03   7
   6   6   6 93388.9 2535.27  11
   6   6   6 95848.4 2958.95   9
   7   6   6 51241.4 1918.36  11
   7   6   6 51725.4 2117.22   9
   7   6   6 55585.8 2142.82   7
   8   6   6 20701.9 1309.22  11
   8   6   6 21023.0 1343.90   9
   9   6   6 104874. 2591.38  11
   9   6   6 106121. 2560.54   9
  10   6   6 115.650 480.368  11
  10   6   6 583.341 545.159   9
  11   6   6 92617.3 2096.22  11
  11   6   6 97123.9 2124.11   9
  12   6   6 29335.0 1107.80  11
  12   6   6 28868.8 1106.82   9
  13   6   6 36468.1 1083.68  11
  13   6   6 39960.1 1104.60   9
  14   6   6 42679.2 975.581  11
 -12   7   6 1067.13 430.074   4
 -11   7   6 11623.8 766.840   4
 -10   7   6 1773.89 614.912   4
  -9   7   6 9027.88 856.573   4
  -8   7   6 5493.20 966.787  13
  -8   7   6 6335.05 827.405   4
  -7   7   6 10074.2 1180.66  13
  -7   7   6 10127.5 923.803   4
  -6   7   6 5047.06 765.306   4
  -6   7   6 4275.26 1005.34  15
  -6   7   6 3960.95 1070.08  13
  -5   7   6 7478.12 1145.03  13
  -5   7   6 7406.42 840.676   4
  -4   7   6 20601.2 1475.60  13
  -4   7   6 19485.8 1101.57   4
  -3   7   6 381.429 786.670  13
  -3   7   6 54.0243 712.275   4
  -3   7   6 296.453 975.515   3
  -2   7   6 17721.7 1138.70   4
  -2   7   6 19250.1 1740.24   3
  -1   7   6 584.178 616.117   7
  -1   7   6 1320.95 1067.11   3
   0   7   6 13462.7 1562.77   3
   0   7   6 12239.4 1010.43   7
   1   7   6 10163.4 877.378  11
   1   7   6 9193.06 1400.81   3
   1   7   6 7941.87 911.301   7
   2   7   6 27050.9 1314.69  11
   2   7   6 28001.4 1914.83   3
   3   7   6 18181.9 1134.91  11
   3   7   6 18484.9 1522.68   3
   3   7   6 18491.5 1449.88   9
   4   7   6 2929.43 656.321  11
   4   7   6 3554.51 915.252   9
   5   7   6 15959.0 1108.47  11
   5   7   6 17265.3 1237.78   9
   6   7   6 5614.35 789.952  11
   6   7   6 5307.03 809.528   9
   7   7   6 6114.15 777.180   9
   7   7   6 7067.50 821.797  11
   8   7   6 20176.4 1149.68  11
   8   7   6 20422.8 1078.03   9
   9   7   6 1283.01 498.404  11
   9   7   6 1444.36 524.358   9
  10   7   6 18671.4 905.478  11
  10   7   6 17879.6 872.021   9
  11   7   6 3264.85 474.003  11
  11   7   6 3043.03 449.203   9
  12   7   6 11788.8 565.134  11
  -9   8   6 1886.87 573.668   4
  -8   8   6 43198.3 1270.05   4
  -7   8   6 16861.9 958.374   4
  -6   8   6 32260.4 1216.42   4
  -6   8   6 4578.55 639.400  15
  -5   8   6 55792.7 1524.37   4
  -5   8   6 54646.9 1797.06  15
  -4   8   6 6671.49 860.345   4
  -4   8   6 26.8304 729.068  15
  -3   8   6 75724.6 1781.67   4
  -3   8   6 68686.2 2288.59  15
  -2   8   6 20043.3 1087.91   4
  -2   8   6 1900.22 860.735  15
  -1   8   6 55246.2 2161.27  15
   0   8   6 27167.1 1626.57  15
   1   8   6 24830.4 1489.21  15
   2   8   6 64231.8 2143.47  15
   3   8   6 563.847 670.668  15
   4   8   6 89488.5 2190.39  15
   5   8   6 7102.86 685.698  11
   5   8   6 8346.54 686.986   9
   6   8   6 23148.2 1029.06  11
   6   8   6 24337.5 931.523   9
   7   8   6 44379.8 1142.01   9
   7   8   6 41838.6 1271.20  11
   8   8   6 19543.8 828.599  11
   8   8   6 19696.2 739.454   9
  -3   9   6 2123.78 498.990  15
  -2   9   6 6624.93 670.610  15
  -1   9   6 8056.35 723.494  15
   0   9   6 10970.9 779.303  15
   1   9   6 4551.36 600.060  15
   2   9   6 1138.84 446.210  15
  19   0  -7-73.0403 269.791  14
  18   0  -7-0.37079 348.195  14
  17   0  -7 246.163 420.097  14
  16   0  -7 150.623 439.060  14
  15   0  -7 463.906 496.369  14
  14   0  -7 131.609 545.953  14
  13   0  -7-126.684 603.198  14
  13   0  -7 42.7578 520.356   1
  12   0  -7 172.512 668.760  14
  12   0  -7 302.791 560.435   1
  11   0  -7 39.0960 795.196   1
  10   0  -7 111.159 1009.42   1
  -9   0   7-97.8378 779.455   8
  -8   0   7-92.8977 760.721   8
  -7   0   7 64.2405 566.392   8
  -6   0   7 419.599 483.989   8
  -5   0   7 202.767 443.860   8
  -4   0   7 182.433 434.225   8
  -3   0   7 404.643 408.644   8
  -2   0   7 257.719 339.515   8
  -1   0   7 628.259 573.658   6
  -1   0   7 312.582 350.212   8
   0   0   7 245.605 339.662   8
   1   0   7 213.583 240.548   1
   1   0   7 375.691 334.336   8
   2   0   7 14.0574 251.965   1
   3   0   7 169.575 268.287   1
   4   0   7 157.636 287.746   1
   5   0   7 197.667 295.577   1
   6   0   7 490.924 377.673   1
   7   0   7-106.249 405.043   1
   8   0   7 275.735 501.782   1
   9   0   7 22.3058 571.237   1
  10   0   7 170.362 550.719   1
  11   0   7 256.579 524.718   1
  12   0   7 94.2941 638.289   2
  12   0   7 302.149 516.405   1
  13   0   7 28.8389 616.346   2
  13   0   7 74.0070 571.763   1
  14   0   7 9.67019 583.232  12
  15   0   7 209.714 476.550   2
  15   0   7 237.522 545.048  12
  16   0   7 42.9526 418.955   2
  16   0   7 209.375 513.844  12
  17   0   7 295.318 345.773   2
  17   0   7-244.081 441.074  12
  18   0   7 144.411 262.344   2
  19   1  -7 60132.7 1046.13  14
  18   1  -7 4015.73 453.416  14
  18  -1  -7 4115.11 463.838  14
  17   1  -7 70402.7 1574.95  14
  17  -1  -7 71208.7 1583.51  14
  16   1  -7 51316.0 1502.98  14
  16  -1  -7 55354.7 1560.95  14
  15   1  -7 22238.4 1114.46  14
  15  -1  -7 22860.4 1152.91  14
  14  -1  -7 110945. 2476.39  14
 -14  -1   7 108579. 2211.86  10
  14   1  -7 111575. 2476.33   1
  13   1  -7 586.621 615.696  14
  13  -1  -7 656.600 615.726  14
 -13  -1   7-227.778 601.844  10
  13   1  -7 726.883 536.551   1
  12   1  -7 103117. 2599.45  14
  12   1  -7 99738.3 2780.29   1
  11   1  -7 30888.7 1901.53   1
 -10  -1   7 80458.6 2662.42   8
  10   1  -7 79829.5 3538.89   1
   9   1  -7 176557. 4295.15   1
  -9  -1   7 157548. 3287.91   8
  -8  -1   7 89708.9 2281.36   8
  -8   1   7 92900.9 2747.47   8
  -7  -1   7 264188. 3413.82   8
  -7   1   7 254150. 4018.05   8
  -6  -1   7 756.170 463.492   8
  -6   1   7 110.761 674.003   8
  -5  -1   7 450169. 3705.87   8
  -5   1   7 460075. 4300.94   8
  -4  -1   7 143767. 2000.10   8
  -4   1   7 146593. 2224.06   8
  -3  -1   7 207993. 2240.78   8
  -3   1   7 222849. 2464.48   8
   2   1  -7 316961. 3532.87   5
  -2   1   7 311664. 2742.26   8
  -1   1   7 4078.06 840.698   6
   1   1  -7 4222.61 576.005   5
  -1  -1   7 3554.23 426.524   8
  -1   1   7 3800.31 455.367   8
   0   1   7 436083. 2790.26   8
   0   1   7 426704. 2984.37   1
   0   1   7 431144. 3082.76   7
   1   1   7 2964.33 355.671   1
   1   1   7 2800.29 389.345   8
   1   1   7 3013.10 371.624   7
   2   1   7 172065. 1768.25   8
   2   1   7 175264. 1852.38   7
   3   1   7 251051. 2551.11   1
   3  -1   7 248949. 2386.97   1
   4   1   7 91278.1 1664.54   1
   4  -1   7 91621.6 1504.92   1
   5   1   7 354188. 3525.10   1
   5  -1   7 356611. 3115.09   1
   6   1   7 8524.81 714.643   1
   6  -1   7 8905.05 613.535   1
   7   1   7 327027. 4239.22   1
   7  -1   7 350344. 3592.77   1
   8   1   7 106796. 2810.57   1
   8  -1   7 114444. 2265.20   1
   9   1   7 215399. 4574.60   1
   9  -1   7 253484. 3602.69   1
  10   1   7 117435. 3134.48   1
  11   1   7 16562.6 1204.50   1
  11   1   7 30194.5 1726.96   2
  12   1   7 131055. 2669.99  12
  12   1   7 132718. 2982.99   1
  12   1   7 135848. 3158.17   2
  13   1   7 2985.93 746.839   2
  13   1   7 3004.72 692.132  12
  13   1   7 3418.03 678.615   1
  14   1   7 139252. 2639.94  12
  14   1   7 140613. 2852.18   2
  15   1   7 34343.5 1324.33  12
  15   1   7 31483.2 1328.26   2
  16   1   7 43836.5 1364.61  12
  16  -1   7 46722.3 1416.94  12
  16   1   7 43283.2 1380.54   2
  17   1   7 96696.3 1732.25  12
  17  -1   7 92663.8 1698.59  12
  18  -1   7 4036.66 428.556  14
  18   1   7 3922.48 406.212   2
  18   2  -7 990.938 363.803  14
  17  -2  -7 2425.03 440.253  14
  17   2  -7 2452.42 453.473  14
  16   2  -7 2387.73 510.042  14
  16  -2  -7 2203.45 487.902  14
 -16  -2   7 1372.04 521.211  10
  15   2  -7 4935.96 662.986  14
  15  -2  -7 6720.37 705.437  14
 -15  -2   7 5772.75 697.180  10
  14   2  -7 3179.02 645.437  14
  14  -2  -7 2971.23 620.345  14
  13   2  -7 3396.83 679.140  14
  13   2  -7 3865.13 709.027   1
  12   2  -7 1819.25 696.336  14
  12   2  -7 1573.02 624.630   1
  11   2  -7 619.107 732.966  14
  11   2  -7 981.916 757.855   1
 -10  -2   7 3414.12 1030.56   8
  10   2  -7 3019.97 1086.89   1
  -9  -2   7 1024.70 755.701   8
   9   2  -7 1001.59 1054.29   1
  -8  -2   7 15541.5 1090.54   8
  -7  -2   7 466.807 506.036   8
  -6  -2   7 1954.18 513.608   8
  -6   2   7 1229.89 886.599   8
  -5  -2   7 1073.81 451.687   8
  -5   2   7 182.064 831.746   8
  -4  -2   7 3880.08 486.310   8
  -4   2   7 3907.48 844.531   8
  -3  -2   7 385.721 361.841   8
  -3   2   7 21.2155 615.043   8
  -2  -2   7 32850.7 945.320   8
  -2   2   7 34891.8 1139.56   8
  -2   2   7 32373.4 1019.33   7
  -1  -2   7 3828.91 458.820   8
  -1   2   7 2981.94 410.215   7
   0  -2   7 59797.6 1235.43   8
   0   2   7 63343.8 1202.50   1
   0   2   7 60381.3 1277.92   7
   1   2   7 132.209 331.895   7
   1   2   7 340.840 268.826   1
   2   2   7 25337.5 857.245   1
   2   2   7 24328.7 873.483   7
   3   2   7 433.627 302.762   1
   3   2   7 455.149 358.831   7
   4   2   7 11112.1 695.535   1
   4   2   7 12919.3 720.354   7
   5   2   7 20786.3 992.402   1
   6   2   7 581.559 488.159   1
   7   2   7 490.252 600.266   1
   8   2   7 37.9133 799.912   1
   9   2   7 1842.29 1107.02   1
  10   2   7 550.763 761.296   1
  11   2   7 4936.40 784.287  12
  11   2   7 5557.09 1031.91   2
  11   2   7 4499.98 848.183   1
  12   2   7 1948.80 669.408  12
  12   2   7 1697.13 674.692   2
  12   2   7 1732.62 654.172   1
  13   2   7 4816.32 795.677   2
  13   2   7 4719.21 724.510  12
  13   2   7 5339.13 730.468   1
  14   2   7 6526.05 748.426  12
  14   2   7 7074.32 822.720   2
  15   2   7 395.430 477.288   2
  15   2   7-98.2540 511.849  12
  16   2   7 590.220 430.279   2
  17   2   7 931.759 371.927   2
  17  -2   7 863.960 424.644  12
  18   2   7 151.131 263.626   2
 -17  -3   7 37402.5 925.295  10
  17   3  -7 36845.7 970.338  14
  16   3  -7 33376.3 1080.75  14
 -16  -3   7 33062.1 1070.55  10
  15   3  -7 9017.44 722.938  14
  14   3  -7 89321.6 2088.58  14
  13   3  -7 518.542 497.177   1
  13   3  -7 1868.39 647.196  14
  12   3  -7 101717. 2547.56   1
  12   3  -7 107839. 2575.79  14
  11   3  -7 52352.2 1924.90  14
  11   3  -7 48460.1 1926.73   1
  10   3  -7 60359.7 2006.32  14
  10   3  -7 57320.3 2293.11   1
  -9  -3   7 96271.4 2617.19   8
   9   3  -7 97345.1 3337.67   1
  -8  -3   7 6636.01 896.707   8
  -8   3   7 5093.86 3054.35   0
   8   3  -7 9237.69 1549.56   1
  -7  -3   7 198908. 3030.20   8
   7   3  -7 188678. 4590.30   1
  -6  -3   7 20611.1 992.393   8
  -5  -3   7 278081. 3128.77   8
  -4  -3   7 72768.6 1550.44   8
  -3  -3   7 58187.1 1331.38   8
  -3   3   7 53693.3 1435.30   7
  -2  -3   7 170554. 2174.39   8
  -2   3   7 163914. 2362.20   7
  -1  -3   7 19296.8 796.556   8
  -1   3   7 18832.6 848.388   7
   0  -3   7 132073. 1915.09   8
   0   3   7 128902. 2095.70   7
   1  -3   7 3282.35 459.705   8
   1   3   7 3524.93 420.859   1
   1   3   7 3501.97 492.519   7
   2   3   7 187969. 2381.79   1
   2   3   7 189570. 2663.82   7
   3   3   7 90955.6 1752.71   1
   3   3   7 93373.8 1960.58   7
   4   3   7 114340. 2099.95   1
   4   3   7 109944. 2261.95   7
   5   3   7 243065. 3304.58   1
   5   3   7 264189. 3759.61   7
   6   3   7 2190.59 561.073   1
   6   3   7 1620.44 658.736   7
   7   3   7 216659. 3832.96   1
   8   3   7 58928.6 2308.95   1
   9   3   7 75138.6 2960.46   1
  10   3   7 172565. 3938.99   1
  10   3   7 172114. 3737.33   9
  10   3   7 164779. 3104.40  12
  10   3   7 168907. 3819.41   2
  11   3   7 18263.2 1152.46  12
  11   3   7 17840.5 1296.44   1
  11   3   7 17718.4 1283.08   2
  12   3   7 167395. 3351.00   1
  12   3   7 166941. 3293.38   2
  13   3   7 136.708 525.750   2
  14   3   7 85647.9 2090.59   2
  15   3   7 21303.4 1024.28   2
  16   3   7 35040.7 1124.54   2
  17  -3   7 53144.9 1069.21  12
  17   3   7 53802.0 1152.68   2
 -17  -4   7 5.50250 299.783  10
  16   4  -7 536.607 334.483  14
 -16  -4   7 860.128 416.671  10
  15   4  -7 1108.50 426.991  14
  14   4  -7 1742.70 487.144  14
  13   4  -7 7168.44 755.991  14
 -12   4   7 745.625 925.363  13
  12   4  -7 390.186 597.941  14
  11   4  -7 10160.3 957.607  14
 -11   4   7 7942.23 1206.25  13
  11   4  -7 8969.02 861.500   1
  10   4  -7 21455.1 1276.71  14
 -10   4   7 24025.9 1684.08  13
  10   4  -7 21211.7 1246.57   1
   9   4  -7 4454.64 759.962  14
   9   4  -7 7464.25 876.646   1
   8   4  -7 11242.2 1000.69  14
   8   4  -7 12360.6 1226.22   1
  -7   4   7 992.403 2865.63   0
   7   4  -7 670.721 920.672   1
   6   4  -7 31574.7 2245.20   1
  -6   4   7 27862.0 4327.96   0
  -5   4   7 987.640 2542.87   0
   5   4  -7 986.828 1074.84   1
  -4   4   7 1596.72 2451.22   0
  -4   4   7 1286.48 467.092   7
  -3  -4   7 20111.8 895.213   8
  -3   4   7 21869.0 1063.32   7
  -2  -4   7 5162.46 546.875   8
  -2   4   7 4799.11 585.040   7
  -1  -4   7 3126.80 468.050   8
  -1   4   7 3065.95 541.137   7
   0   4   7 883.270 441.635   7
   0  -4   7 432.037 387.683   8
   1  -4   7 7301.81 600.234   8
   1   4   7 7158.18 698.920   7
   2   4   7 2900.56 562.286   7
   3   4   7 3706.78 638.039   7
   4   4   7 3263.81 540.085   1
   4   4   7 2999.82 655.033   7
   5   4   7 1718.49 451.397   1
   5   4   7 1513.93 647.384   7
   6   4   7 8167.18 786.052   1
   6   4   7 6399.03 970.497   7
   7   4   7 3131.29 666.303   1
   7   4   7 1692.90 933.945   7
   8   4   7 6619.60 1362.00   2
   8   4   7 7002.64 1165.03   9
   8   4   7 6809.39 916.079   1
   9   4   7 2539.68 877.922   2
   9   4   7 2196.33 977.202   9
   9   4   7 1735.46 748.736   1
  10   4   7 398.836 641.911   2
  10   4   7 938.976 800.029   9
  10   4   7 344.539 626.280   1
  11   4   7 11508.3 1016.66   1
  11   4   7 10584.5 1052.16   9
  11   4   7 11729.5 1008.05   2
  12   4   7 1803.93 577.029   2
  12   4   7 2062.48 635.218   9
  13   4   7 1463.53 557.779   2
  13   4   7 835.656 505.587   9
  14   4   7 455.801 430.662   2
  15   4   7 4578.06 520.673   2
  16   4   7 11.3323 297.205   2
 -16  -5   7 20258.0 611.647  10
 -15  -5   7 11593.5 641.003  10
 -14   5   7 72005.5 1558.92   4
 -13   5   7 598.033 546.383   4
 -12   5   7 95719.7 2422.49  13
 -12   5   7 87345.9 2194.72   4
 -11   5   7 10604.7 1042.81   4
 -11   5   7 10900.2 1203.23  13
 -10   5   7 95897.6 2860.85  13
 -10   5   7 102718. 2596.16   4
  10   5  -7 96966.1 2247.73  14
  -9   5   7 60343.7 2034.51   4
  -9   5   7 63376.0 2456.53  13
   9   5  -7 56769.0 1769.77  14
   9   5  -7 64474.5 2071.40   7
  -8   5   7 29573.9 1885.01  13
  -8   5   7 30831.1 1493.42   4
   8   5  -7 27740.9 1312.44  14
   8   5  -7 31776.8 1564.50   7
  -7   5   7 148373. 3752.31  13
  -7   5   7 152094. 2863.30   4
  -6   5   7 2145.92 1067.07  13
  -6   5   7 2474.54 711.117   4
   6   5  -7 1543.27 579.169   7
  -5   5   7 111745. 2329.30   4
  -5   5   7 114310. 4321.01   3
  -4   5   7 60117.6 1871.57   7
  -3   5   7 106356. 7443.06   0
  -3   5   7 100049. 2347.00   7
  -2   5   7 158132. 9164.61   0
  -2   5   7 169569. 2996.36   7
  -1   5   7 1179.31 506.501   7
  -1   5   7 2523.65 3437.13   0
   0   5   7 174172. 9471.37   0
   0   5   7 260540. 3752.71   7
   1   5   7 26784.6 4198.72   0
   1   5   7 22666.5 1209.76   7
   2   5   7 164921. 3179.31   7
   3  -5   7 64342.8 1582.02   8
   3   5   7 58649.4 1975.03   7
   4   5   7 47635.3 1871.81   7
   5   5   7 185688. 4796.58   3
   5   5   7 160470. 3463.24   7
   6   5   7 542.990 813.333   9
   6   5   7-65.5837 818.423   7
   7   5   7 92070.4 2990.62   9
   7   5   7 103081. 3070.79   7
   8   5   7 24388.6 1670.16   9
   8   5   7 29358.9 1658.36   7
   9   5   7 55640.3 2228.00   9
  10   5   7 65251.7 2175.19   9
  11   5   7 8303.84 873.669   9
  12   5   7 123052. 2422.48   9
  13   5   7 683.631 447.640   9
  14   5   7 57933.1 1261.49   9
  15   5   7 14881.6 633.358  11
 -14  -6   7 2397.10 379.615  10
 -13   6   7 9518.26 656.739   4
 -12   6   7 8918.28 763.708   4
 -11   6   7 37031.6 1505.42  13
 -11   6   7 35308.5 1366.73   4
 -10   6   7 4095.61 906.086  13
 -10   6   7 7205.12 883.935   4
  -9   6   7 1743.64 925.563  13
  -9   6   7 2068.06 738.536   4
  -8   6   7 19995.0 1464.83  13
  -8   6   7 22804.7 1269.01   4
  -7   6   7 1687.25 968.949  13
  -7   6   7 1094.12 647.668   4
  -6   6   7 22216.6 1652.61  13
  -6   6   7 24164.4 1268.14   4
  -6   6   7 26637.3 1914.55   3
  -5   6   7 6225.44 812.763   4
  -5   6   7 6921.24 1200.06  13
  -5   6   7 6370.54 1305.24   3
  -4   6   7 10560.0 1239.70  13
  -4   6   7 10923.2 908.896   4
  -4   6   7 9603.45 1604.14   3
  -3   6   7 28095.7 1618.82  13
  -3   6   7 28588.4 1266.57   4
  -3   6   7 31378.7 2434.55   3
  -3   6   7 26293.2 1338.66   7
  -2   6   7 178.838 652.328   4
  -2   6   7 224.977 1277.85   3
  -2   6   7 189.116 772.738  13
  -2   6   7 660.461 540.105   7
  -1   6   7 51006.5 1953.96  13
  -1   6   7 49407.1 3022.74   3
  -1   6   7 49222.8 1750.71   7
  -1   6   7 43847.1 1600.73   4
   0   6   7 1538.19 589.462   7
   0   6   7 2330.07 821.417  13
   0   6   7 4021.25 918.192   4
   0   6   7 2127.14 1430.20   3
   1   6   7 48469.0 1795.40  13
   1   6   7 44475.3 1607.07   4
   1   6   7 45420.3 2744.59   3
   1   6   7 42126.7 1699.99   7
   2   6   7 5073.23 715.201  11
   2   6   7 5755.26 850.791   7
   2   6   7 5753.53 1364.33   3
   3   6   7 10741.2 907.679  11
   3   6   7 14644.1 1357.88   9
   3   6   7 14932.1 1650.51   3
   3   6   7 14312.2 1158.82   7
   4   6   7 18082.0 1174.78  11
   4   6   7 18190.2 1648.95   3
   4   6   7 16827.2 1284.11   7
   4   6   7 16612.9 1517.03   9
   5   6   7 909.998 610.692  11
   5   6   7 737.997 910.495   9
   5   6   7 1549.10 956.030   3
   5   6   7 1386.12 760.565   7
   6   6   7 20778.4 1274.23  11
   6   6   7 19608.2 1528.04   9
   6   6   7 19218.8 1425.81   7
   7   6   7 3055.59 692.386  11
   7   6   7 3422.92 894.472   9
   8   6   7 10748.2 984.848  11
   8   6   7 10827.8 1085.09   9
   9   6   7 24498.0 1267.69  11
   9   6   7 25075.6 1344.31   9
  10   6   7 3421.54 621.148  11
  10   6   7 2831.73 620.304   9
  11   6   7 13899.3 856.753  11
  11   6   7 13209.1 873.610   9
  12   6   7 336.954 371.945  11
  12   6   7 252.560 399.044   9
  13   6   7 10859.6 616.050  11
  13   6   7 11612.9 625.966   9
  14   6   7 626.521 266.493  11
 -11   7   7 16719.3 784.180   4
 -11  -7   7 15518.3 653.363  10
 -10   7   7 42268.6 1266.84   4
  -9   7   7 58701.4 1622.67   4
  -8   7   7 8667.75 1014.80  13
  -8   7   7 11742.7 916.917   4
  -7   7   7 82761.6 2441.53  13
  -7   7   7 93361.6 2120.19   4
  -6   7   7 1997.83 914.869  13
  -6   7   7 1504.36 864.866  15
  -6   7   7 2476.09 644.234   4
  -5   7   7 81366.2 2550.84  13
  -5   7   7 83150.5 2062.10   4
  -4   7   7 28536.6 1644.04  13
  -4   7   7 30276.2 1390.82   4
  -3   7   7 34178.3 1713.18  13
  -3   7   7 38407.1 1468.26   4
  -3   7   7 39334.0 2286.62   3
  -2   7   7 101172. 3583.61   3
  -2   7   7 104161. 2236.09   4
  -1   7   7 10583.5 1013.89   4
  -1   7   7 1572.64 1011.75   3
   0   7   7 129431. 2490.29   4
   0   7   7 139285. 4228.02   3
   1   7   7 17332.4 1049.97  11
   1   7   7 14860.0 1530.13   3
   2   7   7 40301.3 1500.73  11
   2   7   7 39736.7 1997.98   9
   2   7   7 37717.9 2123.79   3
   3   7   7 90627.5 2243.12  11
   3   7   7 93348.1 2812.56   9
   3   7   7 88219.2 2991.78   3
   4   7   7 24159.9 1253.91  11
   4   7   7 25388.3 1554.54   9
   4   7   7 24049.3 1598.03   3
   5   7   7 67804.2 1974.35  11
   5   7   7 68310.1 2169.34   9
   6   7   7 472.308 529.303  11
   6   7   7 1026.32 660.762   9
   7   7   7 82245.1 2102.70  11
   7   7   7 85267.8 2102.43   9
   8   7   7 14294.3 933.508  11
   8   7   7 14814.9 922.013   9
   9   7   7 59408.6 1595.22  11
   9   7   7 57480.4 1513.47   9
  10   7   7 37112.1 1125.60   9
  10   7   7 37506.8 1160.31  11
  11   7   7 6974.56 511.939  11
  11   7   7 6279.99 497.725   9
  -8   8   7 16312.8 833.732   4
  -7   8   7 7469.48 815.687   4
  -6   8   7 23127.2 1057.57   4
  -5   8   7 10578.3 914.597   4
  -5   8   7 598.474 646.676  15
  -4   8   7 30019.4 1173.88   4
  -4   8   7 13345.2 1085.27  15
  -3   8   7 21496.4 1075.74   4
  -3   8   7 3258.65 842.972  15
  -2   8   7 1759.06 815.965  15
  -1   8   7 6815.07 984.260  15
   0   8   7 1359.34 790.679  15
   1   8   7 2481.00 767.467  15
   2   8   7 7253.24 890.691  15
   3   8   7 1280.79 664.363  15
   4   8   7 2165.50 640.364  15
   5   8   7 589.495 444.832   9
   5   8   7 49.5978 487.105  15
   6   8   7 20359.7 839.480   9
   7   8   7 88.7409 370.181   9
   8   8   7 6154.14 459.634   9
  -1   9   7 5176.52 588.194  15
   0   9   7 36133.3 1107.67  15
  18   0  -8 58381.0 1204.68  14
  17   0  -8 472.409 404.568  14
  16   0  -8 107142. 2088.70  14
  15   0  -8 2531.44 606.610  14
  14   0  -8 46176.4 1665.13  14
  13   0  -8 31139.7 1483.59  14
  13   0  -8 33351.9 1486.53   1
  12   0  -8 21739.0 1407.27  14
 -12   0   8 21890.5 1241.42  10
  12   0  -8 21541.9 1448.93   1
  11   0  -8 61615.7 2286.19  14
 -11   0   8 59770.4 1828.48  10
  11   0  -8 55402.6 2684.31   1
  10   0  -8 499.918 1010.91   1
  -9   0   8 115765. 3080.47   8
  -8   0   8 80196.0 2354.78   8
  -7   0   8 135528. 2716.33   8
  -6   0   8 134838. 2470.21   8
  -5   0   8 14256.4 841.384   8
  -4   0   8 286979. 3039.91   8
  -3   0   8 64688.0 1409.79   8
  -2   0   8 340743. 2958.72   8
  -1   0   8 42078.3 1054.16   8
   0   0   8 9368.25 573.274   8
   1   0   8 439256. 3205.38   8
   2   0   8 19199.4 782.495   8
   2   0   8 17683.5 736.346   1
   3   0   8 92673.2 1652.05   1
   4   0   8 15422.1 741.311   1
   5   0   8 155926. 2338.62   1
   6   0   8 90789.1 1919.35   1
   7   0   8 24096.0 1137.87   1
   8   0   8 264308. 3928.45   1
   9   0   8 1573.05 605.318   1
  10   0   8 102212. 2770.04   1
  11   0   8 20429.6 1302.79   1
  11   0   8 23194.8 1565.13   2
  12   0   8 104242. 2558.31   1
  12   0   8 105148. 2715.33   2
  13   0   8 124041. 2619.46   1
  13   0   8 113252. 2644.55   2
  14   0   8 6843.59 805.750  12
  14   0   8 6921.15 754.348   2
  15   0   8 113657. 2273.59  12
  15   0   8 114581. 2246.77   2
  16   0   8 4846.63 641.475  12
  16   0   8 4799.66 547.757   2
  17   0   8 50753.2 1252.26  12
  17   0   8 49133.3 1131.15   2
  18   1  -8 21.5534 320.434  14
  18  -1  -8 355.866 327.300  14
  17   1  -8 133.519 377.050  14
  17  -1  -8 311.231 414.786  14
  16   1  -8 226.416 457.849  14
  16  -1  -8 510.608 448.594  14
  15   1  -8 4763.28 664.912  14
  15  -1  -8 5339.11 699.958  14
 -15  -1   8 4997.47 732.159  10
  14   1  -8 1698.47 573.939  14
  14  -1  -8 1892.12 660.803  14
 -14  -1   8 1573.85 669.540  10
  13   1  -8 1848.25 662.743  14
  13  -1  -8 1994.55 675.920  14
 -13  -1   8 1358.03 683.212  10
  13   1  -8 1511.13 603.667   1
  12   1  -8 662.818 737.291  14
  12  -1  -8 875.592 861.622  14
 -12  -1   8 740.105 686.628  10
  12   1  -8 1522.92 678.935   1
  11   1  -8 17293.8 1334.44  14
  11  -1  -8 17661.6 1564.29  14
  11   1  -8 17193.4 1692.97   1
 -10  -1   8 252.885 927.989   8
  10   1  -8-128.332 1164.51   1
  -9  -1   8 1808.50 815.383   8
  -8  -1   8 3220.91 783.591   8
  -8   1   8 3309.37 948.870   8
  -7  -1   8 2454.84 655.868   8
  -7   1   8 2051.21 780.275   8
  -6  -1   8 7115.30 713.783   8
  -6   1   8 6720.75 856.379   8
  -5  -1   8 5725.98 610.552   8
  -5   1   8 6100.55 766.906   8
  -4  -1   8 2337.82 497.842   8
  -4   1   8 2631.31 597.122   8
  -3  -1   8 51633.3 1251.56   8
  -3   1   8 52356.5 1339.21   8
  -2  -1   8 147.476 382.603   8
  -2   1   8 75.6154 420.054   8
  -1  -1   8 870.754 391.198   8
  -1   1   8 987.786 417.934   8
   0  -1   8 6678.13 539.947   8
   0   1   8 6542.56 531.100   8
   1   1   8 819.250 326.311   1
   1   1   8 1057.67 381.739   7
   1  -1   8 1139.03 408.254   8
   1   1   8 1041.04 386.882   8
   2   1   8 10052.2 588.595   8
   2   1   8 8653.88 563.189   1
   3   1   8 1340.09 347.583   1
   3   1   8 1510.27 417.181   8
   4   1   8 7660.36 606.586   1
   4  -1   8 7617.61 543.524   1
   5   1   8 5676.41 594.446   1
   5  -1   8 5316.78 504.198   1
   6   1   8 12519.1 869.546   1
   6  -1   8 14188.5 782.205   1
   7  -1   8 1347.62 429.862   1
   7   1   8 1554.38 563.973   1
   8  -1   8 1169.46 476.267   1
   8   1   8 730.246 622.601   1
   9   1   8-160.711 777.275   1
   9  -1   8 308.036 450.071   1
  10   1   8 1067.90 715.287   1
  11   1   8 8291.61 906.960  12
  11   1   8 9260.35 1256.35   2
  11   1   8 8543.56 981.907   1
  12   1   8 5321.48 895.018   2
  12   1   8 4852.75 768.933  12
  12   1   8 5821.48 815.107   1
  13   1   8 87.2925 613.442   2
  13   1   8 194.578 575.234  12
  13   1   8 255.639 543.411   1
  14   1   8 21424.0 1130.45  12
  14   1   8 21260.9 1186.25   2
  15   1   8 2687.85 559.164   2
  15  -1   8 2889.67 626.621  12
  15   1   8 2673.45 598.699  12
  16   1   8 137.188 403.606   2
  16   1   8 112.960 460.628  12
  16  -1   8 403.321 487.242  12
  17  -1   8 272.499 397.616  12
  17   1   8 131.633 335.055   2
  18   1   8 3473.25 339.414   2
  18   2  -8 66015.0 1132.97  14
  17   2  -8 461.299 368.094  14
  16   2  -8 93475.5 1847.53  14
 -16  -2   8 99732.7 1736.97  10
  15   2  -8 26506.9 1160.76  14
 -15  -2   8 29022.7 1155.77  10
  14   2  -8 100542. 2290.07  14
 -14  -2   8 105727. 2206.73  10
  13   2  -8 119794. 2671.25  14
  13   2  -8 119618. 2763.61   1
  12   2  -8 17249.6 1210.78  14
  12   2  -8 17642.3 1290.61   1
  11   2  -8 225812. 4014.71  14
  11   2  -8 225934. 4818.02   1
  10   2  -8 8908.24 1046.29  14
 -10  -2   8 8517.58 1234.53   8
  10   2  -8 7590.81 1496.12   1
  -9  -2   8 192583. 3662.73   8
   9   2  -8 202694. 5245.95   1
  -8  -2   8 61388.5 1957.09   8
  -7  -2   8 122106. 2448.14   8
  -6  -2   8 262003. 3259.27   8
  -6   2   8 246799. 4419.53   8
  -5  -2   8 18065.3 939.020   8
  -5   2   8 15425.7 1269.29   8
  -4  -2   8 241389. 2827.07   8
  -4   2   8 243216. 3605.16   8
  -3  -2   8 19082.5 840.744   8
  -3   2   8 19240.6 1101.77   8
  -2  -2   8 197758. 2387.71   8
  -1  -2   8 196353. 2332.36   8
  -1   2   8 194741. 2532.45   7
   0  -2   8 63705.5 1379.56   8
   0   2   8 66211.6 1436.35   7
   1  -2   8 296740. 2908.49   8
   1   2   8 284991. 2991.89   1
   2   2   8 14378.5 721.117   1
   2   2   8 15303.8 781.277   7
   3   2   8 426486. 3860.50   1
   3   2   8 469280. 3881.00   7
   4   2   8 74260.2 1717.47   1
   5   2   8 152312. 2666.46   1
   6   2   8 231953. 3570.43   1
   7   2   8 78574.5 2386.83   1
   8   2   8 183769. 4220.01   1
   9   2   8 525.111 1050.10   1
  10   2   8 183193. 3190.84  12
  10   2   8 184361. 4533.20   1
  11   2   8 46464.2 1673.05  12
  11   2   8 49552.4 2147.75   1
  11   2   8 50102.1 2232.19   2
  12   2   8 75208.2 2389.90   1
  12   2   8 71296.1 2350.19   2
  13   2   8 59163.2 1968.69   1
  13   2   8 55753.3 1936.86   2
  14   2   8 3257.53 679.615   2
  14   2   8 3220.62 626.296  12
  15   2   8 113196. 2146.57  12
  15   2   8 110541. 2254.63   2
  16  -2   8 7455.41 658.802  12
  16   2   8 6664.96 611.324   2
  17  -2   8 44927.8 1075.21  12
  17   2   8 45084.7 1119.54   2
  18   2   8 35073.9 761.940   2
  17   3  -8 1600.45 337.896  14
 -17  -3   8 2176.42 416.584  10
 -16  -3   8 252.898 435.304  10
  16   3  -8 327.599 369.159  14
  15   3  -8 1149.63 454.670  14
 -15  -3   8 1001.08 542.346  10
  14   3  -8 1938.97 541.734  14
  13   3  -8 4563.97 723.670  14
  12   3  -8 7619.77 916.960  14
  12   3  -8 6794.97 847.400   1
  11   3  -8 1837.43 745.740  14
  11   3  -8 1947.43 683.506   1
  10   3  -8 13124.9 1128.56  14
  10   3  -8 13027.8 1340.63   1
   9   3  -8 780.162 679.071  14
  -9  -3   8 486.745 920.794   8
   9   3  -8 933.053 1099.07   1
  -8   3   8 16776.2 3334.32   0
  -8  -3   8 21461.5 1308.58   8
   8   3  -8 20275.2 2031.75   1
  -7  -3   8 1901.61 641.197   8
  -6  -3   8 1326.01 565.520   8
  -5  -3   8 2171.59 533.202   8
  -4  -3   8 11354.4 761.721   8
  -3  -3   8 10578.7 698.501   8
  -3   3   8 9167.49 729.351   7
  -2  -3   8 2599.33 486.125   8
  -2   3   8 2112.79 456.505   7
  -1  -3   8 6901.80 574.494   8
  -1   3   8 6052.16 585.424   7
   0  -3   8 25309.8 964.800   8
   0   3   8 28370.4 1084.59   7
   1  -3   8 13371.1 739.593   8
   1   3   8 12957.1 693.039   1
   1   3   8 12255.6 783.343   7
   2   3   8 17955.3 834.999   1
   2   3   8 17441.4 933.733   7
   3   3   8 4109.20 504.852   1
   3   3   8 5914.62 667.408   7
   4   3   8 58255.8 1601.89   1
   4   3   8 61761.1 1817.19   7
   5   3   8 6488.98 671.320   1
   6   3   8 8225.25 820.933   1
   7   3   8 938.655 557.161   1
   8   3   8 2138.31 794.245   1
   9   3   8 10073.3 995.450  12
   9   3   8 10051.0 1455.16   2
   9   3   8 12234.3 1358.02   1
   9   3   8 9589.75 1206.39   9
  10   3   8 3416.43 748.722  12
  10   3   8 2423.50 957.808   2
  10   3   8 2312.16 984.402   9
  10   3   8 3389.76 901.599   1
  11   3   8 431.970 672.803  12
  11   3   8-131.782 720.269   2
  11   3   8 93.4849 659.256   1
  12   3   8 13627.8 1008.78  12
  12   3   8 12463.0 1088.82   1
  12   3   8 12312.9 1064.90   2
  13   3   8 486.398 544.632   2
  14   3   8 4336.10 655.013   2
  15   3   8 691.662 434.459   2
  16   3   8 1541.89 422.038   2
  17   3   8 794.244 306.036   2
  16   4  -8 56465.0 1040.96  14
 -16  -4   8 59218.4 1143.24  10
  15   4  -8 13636.6 691.720  14
 -15  -4   8 12232.8 745.658  10
  14   4  -8 70311.5 1604.92  14
  13   4  -8 72341.5 1799.11  14
 -13   4   8 74807.1 2156.02  13
 -12   4   8 16948.7 1380.15  13
  12   4  -8 17898.6 1091.95  14
  11   4  -8 163663. 3118.38  14
 -11   4   8 168515. 3656.09  13
  11   4  -8 162421. 3091.32   1
  10   4  -8 5528.65 830.195  14
 -10   4   8 7489.96 1191.22  13
  10   4  -8 5952.29 851.825   1
   9   4  -8 63479.2 2018.61  14
   9   4  -8 65568.0 2345.37   1
   8   4  -8 40515.4 1621.09  14
   8   4  -8 41784.1 2129.92   1
   7   4  -8 32777.4 1416.01  14
   7   4  -8 29873.9 2088.94   1
  -6   4   8 85923.0 7227.46   0
   6   4  -8 80138.3 3556.34   1
  -5   4   8 21197.1 3887.03   0
   5   4  -8 28450.4 1958.41   1
  -4  -4   8 158785. 2552.66   8
  -3  -4   8 14693.7 832.945   8
  -3   4   8 14346.6 926.230   7
  -2  -4   8 227907. 2807.32   8
  -2   4   8 212771. 3220.47   7
  -1  -4   8 62997.5 1504.61   8
  -1   4   8 64516.6 1776.01   7
   0  -4   8 127311. 2098.84   8
   0   4   8 127226. 2505.48   7
   1  -4   8 176517. 2497.82   8
   1   4   8 186229. 3077.17   7
   2  -4   8 4379.90 569.096   8
   2   4   8 5961.63 745.229   7
   3   4   8 267081. 3975.54   7
   4   4   8 20465.1 1013.33   1
   4   4   8 19369.0 1262.53   7
   5   4   8 99295.1 2276.64   1
   5   4   8 94997.7 2708.83   7
   6   4   8 111993. 2560.23   1
   6   4   8 105097. 3097.24   7
   7   4   8 49610.0 1880.85   1
   7   4   8 47660.7 2220.78   2
   8   4   8 95990.1 2728.30   1
   8   4   8 96941.8 3020.68   9
   8   4   8 88529.9 3064.19   2
   9   4   8 5.85713 851.900   2
   9   4   8 506.342 891.725   9
   9   4   8 632.970 687.699   1
  10   4   8 139063. 3374.37   1
  10   4   8 136667. 3398.91   9
  10   4   8 146965. 3221.49   2
  11   4   8 38365.8 1663.26   9
  11   4   8 38676.1 1604.13   2
  12   4   8 66876.2 1891.77   9
  12   4   8 66451.2 1898.26   2
  13   4   8 46145.1 1378.79   9
  13   4   8 70409.3 1781.29   2
  14   4   8 6631.22 615.789   2
  15   4   8 49441.7 1186.51   2
  16   4   8 414.896 265.187   2
 -15  -5   8 4636.97 448.344  10
 -14  -5   8 2049.29 478.093  10
 -12   5   8 8851.99 1027.19  13
  12   5  -8 9596.12 750.320  14
  11   5  -8 164.479 543.121  14
 -11   5   8 638.375 859.480  13
 -10   5   8 9591.91 1207.89  13
  10   5  -8 10671.4 925.798  14
   9   5  -8 249.261 621.857  14
  -9   5   8-254.633 966.050  13
   9   5  -8 398.122 710.871   7
   8   5  -8 212.377 558.062  14
  -8   5   8 362.565 981.675  13
   8   5  -8 670.823 724.860   7
  -7   5   8 1566.10 1099.12  13
   7   5  -8 2102.14 779.593   7
  -6   5   8 2870.59 1109.54  13
  -6   5   8 2972.81 1519.55   3
  -5   5   8 2827.16 1067.40  13
  -5   5   8 1733.20 1592.96   3
  -4   5   8 414.425 1052.98  13
  -4   5   8 914.808 1608.31   3
  -3   5   8 1338.48 552.995   7
  -3   5   8-482.683 1764.28   3
  -3   5   8 2140.53 981.215  13
  -2   5   8 5422.15 1001.17  13
  -2   5   8 4041.23 2022.95   3
  -2   5   8 4128.01 682.886   7
  -1   5   8 18740.4 2721.98   3
  -1   5   8 17775.9 1080.21   7
   0   5   8 12441.6 2255.34   3
   0   5   8 16464.7 4816.28   0
   0   5   8 12936.2 988.824   7
   1   5   8 15985.2 2555.04   3
   1   5   8 17429.7 1131.27   7
   2  -5   8 62814.3 1594.45   8
   2   5   8 68361.6 3872.06   3
   2   5   8 63166.8 2049.52   7
   3   5   8 2757.43 727.007   7
   3   5   8 2115.09 1515.96   3
   3  -5   8 2642.93 532.941   8
   4   5   8 949.304 1423.59   3
   4  -5   8 672.935 517.059   8
   4   5   8 346.962 662.200   7
   5   5   8 12718.6 1722.13   3
   5   5   8 10118.1 1117.06   7
   6   5   8 3750.47 993.768   9
   6   5   8 4787.11 1025.77   7
   7   5   8 8908.06 1193.79   9
   7   5   8 11335.7 1387.61   7
   8   5   8 1533.60 880.408   9
   9   5   8 17661.0 1385.38   9
  10   5   8 10318.8 1032.78   9
  11   5   8 9811.57 900.617   9
  12   5   8 1523.54 545.329   9
  13   5   8 381.762 376.867   9
  14   5   8 2242.28 370.310   9
  15   5   8 760.302 264.673  11
 -13  -6   8 37577.8 943.261  10
 -12   6   8 20593.0 1023.09  13
 -12  -6   8 21767.7 847.634  10
 -11   6   8 58646.1 1765.80  13
 -10   6   8 1756.28 808.623  13
 -10   6   8 1238.13 619.647   4
  -9   6   8 100783. 2716.55  13
  -9   6   8 121153. 2514.85   4
  -8   6   8 38107.8 1502.27   4
  -8   6   8 32246.7 1785.87  13
  -7   6   8 52814.2 2224.95  13
  -7   6   8 59683.2 1832.92   4
  -6   6   8 76246.2 2689.08  13
  -6   6   8 85252.0 2125.20   4
  -6   6   8 80252.6 3033.17   3
  -5   6   8 2854.80 924.876  13
  -5   6   8 3400.78 691.286   4
  -5   6   8 4436.58 1241.01   3
  -4   6   8 130057. 3255.83  13
  -4   6   8 129700. 2550.77   4
  -4   6   8 123774. 4265.15   3
  -3   6   8 3586.53 900.897  13
  -3   6   8 2556.14 744.915   4
  -3   6   8 3073.37 1305.93   3
  -2   6   8 113474. 2402.31   4
  -2   6   8 107360. 4283.55   3
  -2   6   8 110897. 2651.15   7
  -1   6   8 138612. 3039.58  13
  -1   6   8 129097. 2505.64   4
  -1   6   8 126577. 4715.73   3
  -1   6   8 131875. 2884.98   7
   0   6   8 27286.5 1469.37  13
   0   6   8 31128.8 1475.51   4
   0   6   8 26295.9 1382.53   7
   1   6   8 133410. 2580.83   4
   1   6   8 141358. 4765.60   3
   1   6   8 138477. 3038.49   7
   2   6   8 346.687 589.594   7
   2   6   8-140.194 1192.22   3
   3   6   8 92641.3 2943.35   9
   3   6   8 93404.7 2620.26   7
   4   6   8 21248.8 1246.80  11
   4   6   8 19566.2 1567.27   9
   4   6   8 21938.4 1780.40   3
   4   6   8 20121.6 1419.19   7
   5   6   8 78106.8 2226.98  11
   5   6   8 66173.1 2545.72   9
   5   6   8 78084.2 2891.24   3
   5   6   8 70488.9 2422.12   7
   6   6   8 68257.9 2110.06  11
   6   6   8 65724.9 2469.23   9
   7   6   8 11953.1 990.837  11
   7   6   8 12379.7 1256.55   9
   8   6   8 71619.6 2102.49  11
   8   6   8 70364.7 2261.27   9
   9   6   8 356.464 488.567  11
   9   6   8 518.959 594.846   9
  10   6   8 78985.3 1931.28  11
  10   6   8 79468.3 1966.06   9
  11   6   8 23624.9 1009.92  11
  11   6   8 25463.7 1059.44   9
  12   6   8 24044.7 909.935  11
  12   6   8 26781.0 934.912   9
  13   6   8 64579.2 1215.05  11
  13   6   8 73705.2 1200.71   9
  -8   7   8 10096.9 1024.52  13
  -8   7   8 9675.60 997.645   4
  -7   7   8 11292.5 1120.72  13
  -7   7   8 10952.8 1006.39   4
  -6   7   8 3072.05 950.573  13
  -6   7   8 1512.40 790.416   4
  -5   7   8 17879.9 1357.07  13
  -5   7   8 21766.8 1229.59   4
  -4   7   8 627.812 795.012  13
  -4   7   8 1661.53 813.778   4
  -4   7   8 813.856 924.076   3
  -3   7   8 16238.3 1278.07  13
  -3   7   8 15677.0 1589.59   3
  -2   7   8 2654.67 1066.36   3
  -2   7   8 10433.6 1040.21   4
  -1   7   8 18748.3 1241.21   4
  -1   7   8 6120.56 1263.95   3
   0   7   8 37421.5 2308.00   3
   1   7   8 5616.98 1120.68   3
   2   7   8 4357.96 1083.41   9
   2   7   8 3732.76 994.099   3
   3   7   8 6075.32 741.643  11
   3   7   8 4732.24 1002.12   9
   3   7   8 5042.81 1043.79   3
   4   7   8 18606.1 1054.92  11
   4   7   8 18361.0 1340.83   9
   4   7   8 17685.9 1376.74   3
   5   7   8 4239.06 684.238  11
   5   7   8 4148.45 809.951   9
   6   7   8 4550.58 673.998  11
   6   7   8 4598.13 750.465   9
   7   7   8 14763.2 931.398  11
   7   7   8 14800.6 960.878   9
   8   7   8 847.517 490.588  11
   8   7   8 230.437 494.377   9
   9   7   8 20851.2 915.122  11
   9   7   8 19319.0 892.309   9
  10   7   8 583.003 372.212  11
  10   7   8 753.041 392.786   9
  11   7   8 8971.57 496.142  11
  11   7   8 9513.42 505.806   9
  -6   8   8 42030.9 1269.49   4
  -5   8   8 8110.23 807.865  15
  -4   8   8 51099.7 1696.96  15
  -3   8   8 1897.20 749.191  15
  -2   8   8 47362.1 1808.98  15
  -1   8   8 18647.1 1285.24  15
   0   8   8 12752.6 1109.38  15
   1   8   8 81129.7 2271.32  15
   2   8   8-127.863 648.852  15
   3   8   8 50661.8 1624.09  15
   4   8   8 4959.67 648.791  15
   5   8   8 34720.2 1017.23   9
   5   8   8 26587.6 973.469  15
   6   8   8 25289.9 836.134   9
  18   0  -9-43.1331 291.173  14
  17   0  -9-96.2811 366.586  14
  16   0  -9 280.771 462.458  14
  15   0  -9-4.96140 465.305  14
  14   0  -9-18.4298 577.802  14
  13   0  -9-83.1784 638.142  14
 -13   0   9-37.6073 632.571  10
  12   0  -9-76.0113 744.195  14
 -12   0   9 66.8541 664.556  10
  12   0  -9 536.191 796.437   1
  11   0  -9 78.4144 981.723  14
 -11   0   9 466.239 729.481  10
  11   0  -9 588.629 1081.22   1
  10   0  -9-240.170 991.134   1
  -9   0   9 468.793 856.407   8
  -8   0   9-23.9404 716.263   8
  -7   0   9-124.199 662.306   8
  -6   0   9 47.5710 539.085   8
  -5   0   9 222.753 527.620   8
  -4   0   9 113.881 444.162   8
  -3   0   9-102.423 411.331   8
  -2   0   9 146.967 377.929   8
  -1   0   9 71.7469 354.189   8
   0   0   9 204.410 385.822   8
   1   0   9 141.017 401.480   8
   2   0   9 28.1223 399.166   8
   3   0   9 136.254 300.226   1
   3   0   9-14.0098 434.780   8
   4   0   9 117.431 316.813   1
   5   0   9 317.670 355.891   1
   6   0   9 82.5876 364.909   1
   7   0   9 109.779 439.526   1
   8   0   9-74.7025 482.449   1
   9   0   9 338.324 640.940   1
  10   0   9-200.038 1075.87   2
  10   0   9 39.2780 654.732   1
  11   0   9 310.312 842.070   2
  11   0   9 244.701 565.457   1
  12   0   9 203.414 624.688   1
  12   0   9 71.6439 668.551   2
  13   0   9 243.698 571.677   2
  13   0   9-75.3704 628.375  12
  14   0   9 29.7519 486.352   2
  14   0   9 172.760 547.659  12
  15   0   9 229.152 415.509   2
  15   0   9 15.4925 528.726  12
  16   0   9-14.9859 462.586  12
  16   0   9 385.289 364.674   2
  17   0   9 71.9245 280.061   2
  17   0   9-1.70171 381.031  12
  18   1  -9 56658.8 1043.85  14
  17   1  -9 44632.4 1150.05  14
  17  -1  -9 45561.3 1103.57  14
  16   1  -9 27728.6 1080.78  14
  16  -1  -9 27949.6 1049.33  14
  15   1  -9 94573.3 2073.12  14
  15  -1  -9 101300. 2136.98  14
 -15  -1   9 99618.1 1905.62  10
  14   1  -9 4428.14 688.498  14
  14  -1  -9 4009.53 727.907  14
 -14  -1   9 4395.39 712.131  10
  13   1  -9 89381.5 2394.45  14
  13  -1  -9 95026.6 2514.81  14
 -13  -1   9 90852.5 2142.19  10
  13   1  -9 92650.8 2527.43   1
  12   1  -9 29811.0 1614.63  14
  12  -1  -9 28612.7 1726.04  14
 -12  -1   9 28677.9 1361.71  10
  12   1  -9 29046.3 1756.57   1
  11   1  -9 56420.9 2249.90  14
 -11  -1   9 58315.4 1898.02  10
  11   1  -9 53134.0 2874.08   1
  10   1  -9 65595.9 2332.29  14
 -10   1   9 68032.5 1940.51  10
 -10  -1   9 67976.6 2085.92  10
 -10  -1   9 70688.5 2620.57   8
  -9  -1   9 12371.0 1254.27   8
  -8  -1   9 256627. 4013.12   8
  -8   1   9 250820. 4626.22   8
  -7  -1   9 389.622 585.155   8
  -7   1   9 652.423 843.185   8
  -6  -1   9 252270. 3383.82   8
  -6   1   9 257887. 3910.16   8
  -5  -1   9 155462. 2493.12   8
  -5   1   9 159228. 2827.64   8
  -4  -1   9 140428. 2288.63   8
  -4   1   9 141928. 2482.36   8
  -3  -1   9 192635. 2527.92   8
  -3   1   9 201479. 2732.56   8
  -2  -1   9 14333.0 762.791   8
  -2   1   9 14859.9 828.377   8
  -1  -1   9 294372. 2959.09   8
  -1   1   9 322220. 3087.38   8
   0  -1   9 27534.9 977.598   8
   0   1   9 33848.8 1049.28   8
   1  -1   9 311643. 3071.32   8
   1   1   9 320377. 2938.77   8
   2  -1   9 154401. 2223.51   8
   2   1   9 151065. 2230.74   1
   3   1   9 89745.5 1773.68   1
   4   1   9 271874. 3253.90   1
   5   1   9 6256.27 629.180   1
   5  -1   9 6417.19 567.012   1
   6   1   9 221517. 3381.32   1
   6  -1   9 229541. 3097.37   1
   7   1   9 58702.1 1947.54   1
   7  -1   9 67271.4 1796.09   1
   8   1   9 79863.6 2527.63   1
   8  -1   9 85094.0 2164.25   1
   9   1   9 154116. 3901.19   1
   9  -1   9 182864. 3309.00   1
  10   1   9 31413.8 1461.45  12
  10   1   9 28012.0 1757.94   1
  10   1   9 26559.6 1941.27   2
  11   1   9 125409. 2655.54  12
  11   1   9 127190. 3507.23   2
  12   1   9 3060.16 850.468   2
  12   1   9 2713.12 737.765  12
  12   1   9 3858.44 784.087   1
  13   1   9 144986. 2727.20  12
  13   1   9 153320. 3120.47   2
  14   1   9 54886.4 1635.57  12
  14   1   9 53921.1 1737.14   2
  15   1   9 45420.5 1413.26  12
  15  -1   9 45142.6 1443.38  12
  15   1   9 43231.0 1412.66   2
  16   1   9 61107.7 1456.64  12
  16  -1   9 63239.6 1482.35  12
  16   1   9 61394.0 1450.22   2
  17   1   9 229.142 306.002   2
  17  -1   9 320.427 392.710  12
  17   2  -9 495.929 332.257  14
 -16  -2   9 1248.37 473.181  10
  16   2  -9 1350.19 435.554  14
  15   2  -9 218.152 461.388  14
 -15  -2   9-144.576 531.844  10
  14   2  -9 856.720 539.902  14
 -14  -2   9 671.291 575.474  10
  13   2  -9 5369.07 778.511  14
 -13  -2   9 5426.48 798.512  10
  12   2  -9 455.519 655.937  14
 -12  -2   9 98.3324 705.224  10
  12   2  -9 574.712 707.025   1
  11   2  -9 5266.21 951.909  14
  11   2  -9 4347.74 1098.20   1
  10   2  -9 597.829 784.665  14
 -10  -2   9 649.050 1002.57   8
  10   2  -9 169.011 1335.06   1
   9   2  -9 9049.33 1011.99  14
  -9  -2   9 8347.92 1077.28   8
   9   2  -9 11066.4 1504.28   1
  -8  -2   9 492.098 653.011   8
  -7  -2   9 53.0305 560.319   8
  -6  -2   9 21.1995 516.100   8
  -6   2   9-59.8727 977.453   8
  -5  -2   9 1206.59 493.267   8
  -5   2   9 978.240 840.930   8
  -4  -2   9 5780.24 624.628   8
  -4   2   9 4787.14 918.889   8
  -3  -2   9 5456.10 582.313   8
  -2  -2   9 13619.7 761.991   8
  -1  -2   9 4967.67 547.869   8
   0  -2   9 12550.9 728.718   8
   0   2   9 13634.7 805.901   7
   1  -2   9 42419.2 1245.87   8
   1   2   9 44041.1 1307.84   7
   2   2   9 440.268 326.850   1
   2   2   9 605.298 378.242   7
   2  -2   9 744.631 428.907   8
   3   2   9 661.429 356.139   1
   4   2   9 5856.95 623.847   1
   5   2   9 15441.2 959.234   1
   6   2   9 727.008 531.042   1
   7   2   9 130.842 594.055   1
   8   2   9 923.537 766.783   1
   9   2   9 8736.11 997.561  12
   9   2   9 7228.36 1246.61   2
   9   2   9 5706.36 1349.97   1
  10   2   9 758.278 647.654  12
  10   2   9 378.192 1072.06   2
  10   2   9 1014.37 903.193   1
  11   2   9 1154.48 695.696  12
  11   2   9 1703.76 909.604   2
  11   2   9 1512.53 759.761   1
  12   2   9 7119.64 825.429  12
  12   2   9 10043.4 1036.40   1
  12   2   9 9282.40 1081.34   2
  13   2   9 10456.7 899.781  12
  13   2   9 9658.33 948.008   2
  14   2   9-12.9903 489.161   2
  14   2   9 12.7113 526.948  12
  15   2   9 1963.93 494.950   2
  16   2   9 888.386 402.588   2
  16  -2   9 619.176 441.545  12
  17   2   9 8.37311 290.637   2
  17  -2   9 43.7260 329.706  12
  17   3  -9 27830.0 714.074  14
 -16  -3   9 15255.1 699.100  10
  16   3  -9 14904.6 687.745  14
  15   3  -9 52444.7 1365.44  14
 -15  -3   9 50381.4 1328.00  10
  14   3  -9 693.629 479.670  14
 -14  -3   9 1232.75 579.334  10
  13   3  -9 117097. 2479.85  14
 -13  -3   9 117116. 2381.50  10
  12   3  -9 2876.88 736.334  14
  11   3  -9 90064.4 2537.23  14
  11   3  -9 90499.3 2765.99   1
  10   3  -9 112017. 2788.43  14
 -10  -3   9 122211. 3305.70   8
  10   3  -9 117792. 3569.18   1
   9   3  -9 36256.1 1653.94  14
  -9  -3   9 39949.3 1898.93   8
   9   3  -9 34422.6 2579.38   1
  -8  -3   9 169838. 3339.59   8
   8   3  -9 170673. 4942.00   1
  -7  -3   9 31274.6 1432.39   8
  -6  -3   9 137008. 2587.34   8
  -5  -3   9 168518. 2732.94   8
  -4  -3   9 70014.6 1740.52   8
  -3  -3   9 289078. 3302.22   8
  -2   3   9 845.880 456.448   7
  -2  -3   9 775.102 451.518   8
  -1  -3   9 287632. 3154.83   8
  -1   3   9 282272. 3525.70   7
   0  -3   9 15022.1 828.153   8
   0   3   9 16458.6 929.855   7
   1  -3   9 212176. 2772.45   8
   1   3   9 218986. 3118.45   7
   2   3   9 128054. 2247.02   1
   2   3   9 130383. 2484.80   7
   3   3   9 64925.7 1668.64   1
   3   3   9 69553.1 1913.97   7
   4   3   9 278008. 3644.54   1
   5   3   9 14692.3 983.129   1
   6   3   9 192524. 3457.21   1
   7   3   9 49471.9 1950.13   1
   8   3   9 35067.0 1869.52   1
   8   3   9 35862.0 1965.12   2
   9   3   9 103282. 2542.15  12
   9   3   9 85070.4 3097.20   1
   9   3   9 98712.0 2919.14   9
   9   3   9 89074.9 3155.82   2
  10   3   9 1741.14 760.631  12
  10   3   9 2746.30 1001.49   2
  10   3   9 1825.21 901.480   9
  10   3   9 2397.67 881.839   1
  11   3   9 95456.7 2799.09   1
  11   3   9 92448.9 2752.28   2
  12   3   9 5818.37 825.231   2
  13   3   9 67781.5 1953.18   2
  14   3   9 23483.0 1084.19   2
  15   3   9 37995.8 1186.59   2
  16  -3   9 84158.7 1447.23  12
  16   3   9 87776.8 1483.65   2
 -16  -4   9 2579.19 373.492  10
 -15  -4   9 117.850 390.805  10
  15   4  -9 393.323 338.228  14
 -14  -4   9 2002.45 524.620  10
  14   4  -9 2429.03 473.685  14
  13   4  -9 1101.56 495.410  14
 -13   4   9 1192.13 763.706  13
 -13  -4   9 1248.87 544.542  10
 -12   4   9 908.592 846.873  13
  12   4  -9 1231.84 554.063  14
 -11   4   9 5545.01 1101.03  13
  11   4  -9 6006.08 798.458  14
  10   4  -9 8961.90 936.839  14
  10   4  -9 9590.96 995.674   1
 -10   4   9 10465.4 1318.15  13
   9   4  -9 884.752 680.784  14
   9   4  -9 2218.17 779.012   1
   8   4  -9 3071.76 731.251  14
   8   4  -9 2995.04 968.639   1
   7   4  -9 3429.98 680.832  14
   7   4  -9 3329.64 1378.07   1
   6   4  -9 361.369 512.769  14
   6   4  -9-371.559 1124.70   1
  -5  -4   9 888.250 579.247   8
  -4  -4   9 27.3859 547.756   8
  -3  -4   9 317.089 517.527   8
  -2  -4   9 9587.56 734.482   8
  -2   4   9 8494.94 830.640   7
  -1  -4   9 123.770 419.524   8
  -1   4   9 26.3514 459.101   7
   0  -4   9 13823.7 819.540   8
   0   4   9 13505.2 945.047   7
   1   4   9 224.774 502.226   7
   1  -4   9 183.640 442.669   8
   2  -4   9 13075.1 841.099   8
   2   4   9 14098.4 1039.17   7
   3  -4   9 14609.5 894.863   8
   3   4   9 16097.4 1157.25   7
   4  -4   9 14347.8 907.450   8
   4   4   9 16009.0 965.263   1
   4   4   9 16601.7 1289.79   7
   5   4   9 1388.77 850.391   7
   5   4   9 559.658 471.024   1
   6   4   9-180.188 520.693   1
   6   4   9 292.638 989.047   2
   7   4   9 2862.41 1007.41   2
   7   4   9 3566.26 714.694   1
   8   4   9 378.255 968.664   2
   8   4   9 91.9343 802.896   9
   8   4   9 311.530 637.550   1
   9   4   9 740.078 883.096   2
   9   4   9 1410.36 896.726   9
   9   4   9 434.313 784.039   1
  10   4   9 2413.61 751.241   2
  10   4   9 2381.77 908.147   9
  11   4   9 211.557 623.638   2
  11   4   9 609.574 639.699   9
  12   4   9 2153.47 631.034   2
  12   4   9 1946.82 585.302   9
  13   4   9 311.194 452.928   2
  14   4   9 2105.22 431.409   2
  15   4   9 6345.57 484.505   2
 -15  -5   9 37451.2 802.633  10
 -14  -5   9 314.902 396.386  10
 -13   5   9 52857.6 1487.57  13
 -13  -5   9 55278.1 1332.59  10
 -12   5   9 13445.4 1085.42  13
 -12  -5   9 14305.0 882.047  10
 -11   5   9 53576.5 1999.15  13
 -10   5   9 61365.6 2262.19  13
  -9   5   9 9471.79 1257.62  13
  -8   5   9 98526.3 3044.40  13
  -7   5   9 4412.11 1176.90  13
  -6   5   9 93035.6 3050.91  13
  -6   5   9 95832.2 3883.28   3
  -5   5   9 47403.3 2244.23  13
  -5   5   9 29781.5 2479.40   3
  -4   5   9 68438.2 2517.92  13
  -4   5   9 57471.9 3790.49   3
  -3   5   9 121995. 3126.30  13
  -3   5   9 104400. 5009.57   3
  -2   5   9 8421.38 1086.63  13
  -2   5   9 9820.39 2369.02   3
  -2   5   9 6117.29 791.453   7
  -1   5   9 143630. 6223.56   3
  -1   5   9 149506. 3103.93   7
   0   5   9 14248.7 1185.30  13
   0   5   9 14103.8 2574.55   3
   0   5   9 11164.5 978.414   7
   1  -5   9 146937. 2415.16   8
   1   5   9 153018. 6147.38   3
   1   5   9 147555. 3119.27   7
   2  -5   9 27905.5 1153.96   8
   2   5   9 30984.2 3039.51   3
   2   5   9 29252.3 1492.89   7
   3  -5   9 17768.7 1003.84   8
   3   5   9 16983.7 2272.80   3
   3   5   9 18020.3 1327.75   7
   4  -5   9 199356. 3004.59   8
   4   5   9 212557. 5897.20   3
   5   5   9 2219.18 907.749   7
   5   5   9 2682.49 1306.28   3
   5  -5   9 3622.20 676.045   8
   6   5   9 90987.7 2919.04   9
   6  -5   9 103919. 2316.78   8
   7   5   9 31456.7 1844.56   9
   8   5   9 72506.2 2604.79   9
   9   5   9 66207.6 2357.49   9
  10   5   9 14358.0 1093.19   9
  11   5   9 108538. 2312.30   9
  12   5   9 1738.14 470.179   9
  13   5   9 53501.7 1190.62   9
  14   5   9 17785.6 687.196  11
 -13  -6   9 381.056 305.639  10
 -12   6   9 13236.0 838.029  13
 -12  -6   9 14466.3 681.070  10
 -11   6   9 637.794 623.431  13
 -11  -6   9 509.591 456.999  10
 -10   6   9 888.283 708.740  13
 -10  -6   9 1004.49 525.422  10
  -9   6   9 10017.9 1085.15  13
  -9  -6   9 11869.4 919.345  10
  -8   6   9 103.025 833.091  13
  -7   6   9 16593.8 1384.24  13
  -6   6   9 11109.4 1297.14  13
  -6   6   9 10592.9 1377.99   3
  -5   6   9 9787.73 1201.35  13
  -5   6   9 9887.20 1517.86   3
  -4   6   9 8600.14 1096.45  13
  -4   6   9 7013.32 1383.36   3
  -3   6   9 1242.63 796.501  13
  -3   6   9 1153.89 1256.94   3
  -2   6   9 19677.4 1339.34  13
  -2   6   9 17448.7 2010.88   3
  -1   6   9 4705.28 799.394   7
  -1   6   9 3494.99 842.156  13
  -1   6   9 1747.54 1403.13   3
   0   6   9 38133.2 1635.28  13
   0   6   9 33515.2 2634.44   3
   0   6   9 32347.9 1562.35   7
   1   6   9 1408.59 698.883   7
   1   6   9 1978.38 1236.93   3
   2   6   9 10271.1 1651.97   3
   2   6   9 9187.72 1039.67   7
   3   6   9 7607.25 1177.67   9
   3   6   9 10602.9 1496.92   3
   3   6   9 9313.92 1040.78   7
   4   6   9 4374.51 751.576  11
   4   6   9 3791.33 1038.27   9
   4   6   9 3887.70 1082.14   3
   5   6   9 8253.34 854.721  11
   5   6   9 6961.36 1109.38   9
   5   6   9 7943.37 1201.38   3
   6   6   9 2002.01 633.949  11
   6   6   9 1914.80 866.845   9
   7   6   9 16839.6 1095.09  11
   7   6   9 19270.9 1401.09   9
   8   6   9 11656.5 922.299  11
   8   6   9 13682.0 1121.38   9
   9   6   9 3030.01 578.059  11
   9   6   9 2880.43 657.711   9
  10   6   9 12501.3 808.647  11
  10   6   9 11479.6 827.826   9
  11   6   9 161.299 371.855  11
  11   6   9 58.8696 409.027   9
  12   6   9 13129.5 635.419  11
  12   6   9 14212.2 646.934   9
  -8   7   9 60649.1 1822.23  13
  -7   7   9 423.285 745.466  13
  -6   7   9 70738.1 2186.17  13
  -5   7   9 11030.4 1106.47  13
  -5   7   9 12473.4 1001.17   4
  -5   7   9 10497.5 1178.23   3
  -4   7   9 29812.4 1530.07  13
  -4   7   9 31873.6 1848.56   3
  -3   7   9 64950.2 2073.37  13
  -3   7   9 67057.6 2726.27   3
  -2   7   9 4315.44 1081.21   3
  -1   7   9 81417.5 3137.20   3
   0   7   9 18208.0 1647.65   3
   1   7   9 70166.7 2384.65   9
   1   7   9 66730.6 2762.88   3
   2   7   9 81557.1 2528.85   9
   2   7   9 80509.1 2848.34   3
   3   7   9 36564.5 1766.94   9
   3   7   9 35125.5 1863.90   3
   4   7   9 71210.6 1775.58  11
   4   7   9 68858.8 2226.55   9
   4   7   9 65624.3 2280.68   3
   5   7   9 1484.08 535.077  11
   5   7   9 1395.90 663.004   9
   6   7   9 80290.7 1848.83  11
   6   7   9 76929.1 2005.33   9
   7   7   9 5216.77 613.974  11
   7   7   9 5497.86 671.698   9
   8   7   9 46053.5 1299.01  11
   8   7   9 45537.7 1312.97   9
   9   7   9 39635.3 1091.78  11
   9   7   9 37814.2 1081.35   9
  10   7   9 13088.3 586.472  11
  10   7   9 12903.0 597.138   9
  -5   8   9 3351.29 586.987  15
  -4   8   9 9382.65 841.958  15
  -3   8   9 451.838 653.043  15
  -2   8   9 10267.2 975.500  15
  -1   8   9 668.092 683.752  15
   0   8   9 7042.65 888.373  15
   1   8   9 3515.36 741.776  15
   2   8   9 2290.22 643.826  15
   3   8   9 5124.50 687.902  15
   4   8   9 149.746 425.626   9
   4   8   9-270.208 474.496  15
  17   0 -10 48003.1 1083.90  14
  16   0 -10 11925.5 755.181  14
  15   0 -10 68697.4 1751.25  14
  14   0 -10 73583.4 2009.48  14
 -14   0  10 72045.0 1713.08  10
  13   0 -10 9584.56 958.777  14
 -13   0  10 8744.33 844.995  10
  12   0 -10 66896.4 2379.22  14
 -12   0  10 65281.4 1901.72  10
  12   0 -10 69921.1 2586.47   1
  11   0 -10 16570.3 1634.05  14
 -11   0  10 20114.3 1237.16  10
  11   0 -10 21182.7 2126.40   1
  10   0 -10 47651.8 2261.89  14
 -10   0  10 51010.5 1820.66  10
  -9   0  10 24747.1 1432.65  10
  -9   0  10 24775.4 1683.49   8
  -8   0  10 87909.3 2633.56   8
  -7   0  10 152351. 3154.45   8
  -6   0  10 2712.23 705.469   8
  -5   0  10 205839. 3141.62   8
  -4   0  10 1007.18 512.239   8
  -3   0  10 130712. 2281.45   8
  -2   0  10 29698.4 1124.34   8
  -1   0  10 85501.5 1749.66   8
   0   0  10 216145. 2667.56   8
   1   0  10 684.198 449.793   8
   2   0  10 300566. 3193.58   8
   3   0  10 20373.1 963.689   8
   4   0  10 106689. 2060.22   8
   4   0  10 98030.3 1997.83   1
   5   0  10 90544.3 1979.77   8
   5   0  10 87167.2 1978.44   1
   6   0  10 25908.8 1190.22   1
   7   0  10 162809. 3090.24   1
   8   0  10 8298.56 909.112   1
   9   0  10 121785. 3150.50   1
   9   0  10 99946.6 3011.30   2
  10   0  10 36312.3 1749.08   1
  10   0  10 36620.1 2151.52   2
  11   0  10 63926.9 2155.54   1
  11   0  10 64051.4 2411.95   2
  12   0  10 76011.8 2191.60   1
  12   0  10 80173.1 2366.65   2
  13   0  10 45769.5 1577.22  12
  13   0  10 47697.4 1663.91   2
  14   0  10 107564. 2210.45  12
  14   0  10 118689. 2285.21   2
  15   0  10 2995.27 501.151   2
  15   0  10 3000.91 563.635  12
  16   0  10 76281.3 1520.88  12
  16   0  10 75141.3 1347.86   2
  17   0  10 13898.3 621.076  12
  17   1 -10 937.458 354.301  14
  16   1 -10 111.183 385.284  14
  16  -1 -10-90.8053 373.207  14
  15   1 -10 1899.95 526.786  14
  15  -1 -10 2443.36 574.677  14
 -15  -1  10 1827.55 550.800  10
  14   1 -10-68.5768 507.952  14
  14  -1 -10 207.345 533.466  14
 -14  -1  10 197.381 562.547  10
  13   1 -10 817.929 643.784  14
  13  -1 -10 223.737 669.638  14
 -13  -1  10 300.656 594.412  10
  12   1 -10 6358.39 981.493  14
 -12  -1  10 5699.74 845.003  10
  12   1 -10 6550.22 1066.73   1
  11   1 -10 259.641 837.919  14
 -11   1  10 441.672 726.512  10
 -11  -1  10 525.745 723.183  10
  11   1 -10 346.643 1173.32   1
  10   1 -10 366.336 852.579  14
 -10   1  10 595.006 706.928  10
 -10  -1  10 159.630 790.128  10
 -10  -1  10 164.743 1018.09   8
  10   1 -10 832.289 1156.02   1
   9   1 -10 307.431 792.349  14
  -9   1  10 152.751 808.872  10
  -9  -1  10 192.357 833.554  10
  -9  -1  10 104.685 832.521   8
  -8  -1  10-83.5491 652.343   8
  -8   1  10 10.6641 958.236   8
  -7  -1  10 5855.25 881.671   8
  -7   1  10 5493.00 1059.54   8
  -6  -1  10 4893.09 724.452   8
  -6   1  10 5053.15 884.020   8
  -5  -1  10 2981.28 603.998   8
  -5   1  10 3001.28 763.954   8
  -4  -1  10 169.524 448.008   8
  -4   1  10 374.790 571.137   8
  -3  -1  10 11178.5 790.330   8
  -3   1  10 10697.4 847.882   8
  -2  -1  10 9425.01 703.254   8
  -2   1  10 10182.8 795.078   8
  -1  -1  10 26.4446 449.331   8
  -1   1  10 110.779 479.201   8
   0  -1  10 12584.2 773.241   8
   0   1  10 13809.7 804.902   8
   1  -1  10 584.213 425.902   8
   1   1  10 302.830 468.705   8
   2  -1  10 183.875 419.633   8
   3  -1  10 12345.0 808.516   8
   3   1  10 12283.6 772.035   1
   4   1  10 2086.77 457.164   1
   4  -1  10 2356.98 581.295   8
   5   1  10 247.917 426.295   1
   6   1  10 1478.28 528.494   1
   6  -1  10 1087.35 397.447   1
   7   1  10 980.455 569.835   1
   7  -1  10 1695.26 508.863   1
   8   1  10 2295.96 754.238   1
   8  -1  10 2025.96 591.574   1
   9   1  10 697.520 807.382   1
   9   1  10 2187.61 764.182  12
   9  -1  10 2077.24 663.806   1
   9   1  10 1711.55 977.920   2
  10   1  10 687.019 786.257   1
  10   1  10 423.241 653.075  12
  10   1  10-2.93671 1074.77   2
  11   1  10 1770.57 723.395   1
  11   1  10 2463.53 714.604  12
  11   1  10 2598.72 954.722   2
  12   1  10 115.345 763.178   2
  12   1  10 991.353 615.291  12
  13   1  10 513.635 570.677   2
  13   1  10-48.5444 583.753  12
  14   1  10 8150.73 765.688  12
  14  -1  10 8046.13 794.558  12
  14   1  10 7815.41 741.986   2
  15   1  10 672.419 417.091   2
  15   1  10 847.529 471.157  12
  15  -1  10 502.463 469.612  12
  16   1  10 44.9023 330.906   2
  16   1  10 72.4782 393.862  12
  16  -1  10 165.367 443.426  12
  17   1  10 955.586 270.625   2
  17  -1  10 688.012 338.248  12
  17   2 -10 65175.3 1135.79  14
  16   2 -10 17810.4 782.678  14
 -16  -2  10 18195.9 754.800  10
  15   2 -10 55331.8 1466.22  14
 -15  -2  10 56670.3 1412.01  10
  14   2 -10 56482.9 1672.57  14
 -14  -2  10 60392.1 1615.55  10
  13   2 -10 13535.1 1047.19  14
 -13  -2  10 13756.8 1018.44  10
  12   2 -10 107985. 2743.30  14
 -12  -2  10 104406. 2396.67  10
  11   2 -10 33.8877 786.753  14
 -11  -2  10 750.786 727.312  10
  11   2 -10 279.856 966.570   1
  10   2 -10 185855. 3748.68  14
 -10  -2  10 188311. 4151.82   8
  10   2 -10 193641. 5812.10   1
   9   2 -10 20814.0 1370.28  14
  -9   2  10 20928.4 1253.78  10
  -9  -2  10 18704.9 1449.96  10
  -9  -2  10 24452.4 1585.87   8
   9   2 -10 26304.9 2070.50   1
   8   2 -10 64940.6 2062.00  14
  -8   2  10 63115.5 1941.81  10
  -8  -2  10 67588.0 2221.45   8
  -7  -2  10 187811. 3319.67   8
  -6  -2  10 54544.7 1725.18   8
  -6   2  10 54696.0 2372.82   8
  -5  -2  10 253098. 3447.73   8
  -5   2  10 244592. 4399.52   8
  -4  -2  10 20502.6 1064.52   8
  -4   2  10 19586.0 1383.85   8
  -3  -2  10 232616. 3071.54   8
  -2  -2  10 173994. 2572.02   8
  -1  -2  10 136150. 2276.64   8
   0  -2  10 187861. 2621.09   8
   1  -2  10 136.066 428.081   8
   2  -2  10 290863. 3389.40   8
   2   2  10 295409. 3414.42   1
   3  -2  10 24512.0 1104.87   8
   3   2  10 26992.5 1118.15   1
   4   2  10 203415. 3136.59   1
   5   2  10 149349. 2881.82   1
   6   2  10 34825.9 1558.98   1
   7   2  10 293303. 4787.90   1
   8   2  10 3657.44 884.992  12
   8   2  10 2654.54 882.147   2
   8   2  10 2286.73 836.786   1
   9   2  10 151332. 4551.96   1
   9   2  10 145496. 3796.45   2
  10   2  10 69048.6 2036.60  12
  10   2  10 68453.9 2953.23   1
  10   2  10 62277.4 2803.54   2
  11   2  10 76299.9 2092.11  12
  11   2  10 83077.2 2795.59   1
  11   2  10 81532.4 2819.21   2
  12   2  10 138572. 2665.35  12
  12   2  10 147662. 3276.00   2
  13   2  10 3185.79 712.217   2
  13   2  10 3277.31 680.139  12
  14   2  10 103874. 2062.92  12
  14   2  10 112917. 2301.42   2
  15  -2  10 6716.82 659.998  12
  15   2  10 6434.96 636.481   2
  16  -2  10 67497.6 1331.59  12
  16   2  10 65136.4 1317.23   2
  16   3 -10 2963.46 389.932  14
 -16  -3  10 3345.81 437.671  10
 -15  -3  10 2589.21 518.059  10
  15   3 -10 2542.60 440.183  14
 -14   3  10 1721.94 701.995  13
  14   3 -10 1307.41 486.824  14
 -14  -3  10 1409.32 553.430  10
  13   3 -10 1649.86 567.960  14
 -13  -3  10 2020.77 636.900  10
  12   3 -10 435.012 605.153  14
 -12  -3  10 853.760 685.933  10
  11   3 -10 18565.9 1288.31  14
 -11  -3  10 18058.8 1227.94  10
  10   3 -10 2824.29 789.812  14
 -10  -3  10 1783.26 895.337  10
 -10  -3  10 2995.58 1200.71   8
  10   3 -10 2806.94 1034.88   1
   9   3 -10 4971.60 829.421  14
  -9  -3  10 5302.60 1072.16   8
   9   3 -10 5594.89 1503.75   1
   8   3 -10 3356.18 762.298  14
  -8  -3  10 3570.41 889.518   8
   8   3 -10 3520.76 1268.53   1
   7   3 -10 6656.36 844.227  14
  -7  -3  10 8785.50 925.916   8
  -6  -3  10 6.59159 608.761   8
  -5  -3  10 187.742 550.115   8
  -4  -3  10 15477.7 954.099   8
  -3  -3  10 5975.35 668.693   8
  -2  -3  10 685.202 419.382   8
  -1  -3  10 10786.8 754.623   8
   0   3  10 772.071 489.161   7
   0  -3  10 1176.78 454.731   8
   1  -3  10 22579.1 1035.47   8
   1   3  10 23541.5 1184.46   7
   2  -3  10 12347.6 835.515   8
   2   3  10 13128.7 960.490   7
   3  -3  10 11666.0 830.173   8
   3   3  10 12231.3 838.029   1
   4   3  10-67.3984 432.790   1
   4  -3  10 793.039 510.932   8
   5   3  10 1066.63 530.062   1
   6   3  10 13138.2 1202.02  12
   6   3  10 12589.8 1000.39   1
   6   3  10 11839.8 1079.85   2
   7   3  10 3805.70 749.020   1
   7   3  10 2238.54 783.356  12
   7   3  10 5160.10 987.386   2
   8   3  10 363.231 755.325  12
   8   3  10 1060.34 919.095   2
   8   3  10 514.323 663.982   1
   9   3  10 2886.55 850.126  12
   9   3  10 1920.77 1034.50   2
   9   3  10 2088.37 915.236   9
   9   3  10 2451.97 859.905   1
  10   3  10 3317.62 782.285  12
  10   3  10 3375.28 1071.54   2
  10   3  10 2477.63 952.825   1
  11   3  10 5057.47 933.531   2
  12   3  10 1001.15 637.185   2
  13   3  10 2042.32 597.233   2
  14   3  10 1129.71 491.576   2
  15   3  10 4957.68 505.138   2
  16   3  10 98.8439 283.504   2
  16  -3  10 179.017 335.980  12
 -15  -4  10 17121.1 681.021  10
  14   4 -10 25793.9 903.173  14
 -14  -4  10 26940.1 963.760  10
  13   4 -10 8167.35 700.855  14
 -13   4  10 7537.61 938.704  13
 -13  -4  10 8153.79 730.656  10
  12   4 -10 85890.9 2004.02  14
 -12   4  10 81565.9 2371.60  13
 -12  -4  10 84541.4 1993.86  10
  11   4 -10 1252.27 607.267  14
 -11   4  10 1504.66 897.700  13
 -11  -4  10 1665.95 741.821  10
  10   4 -10 73607.1 2142.39  14
 -10  -4  10 74079.1 2244.14  10
   9   4 -10 38779.2 1630.49  14
   9   4 -10 42086.2 2010.18   1
   8   4 -10 65870.4 2060.31  14
   8   4 -10 43576.1 2325.39   1
   7   4 -10 56260.6 1858.03  14
   7   4 -10 35518.0 2672.36   1
   6   4 -10 16232.6 1074.73  14
  -6  -4  10 18168.5 1202.98   8
  -5  -4  10 151534. 2782.06   8
  -4  -4  10 1531.80 604.528   8
  -3  -4  10 174984. 2821.34   8
  -2  -4  10 91310.7 2011.62   8
  -1  -4  10 39987.2 1340.81   8
  -1   4  10 39049.1 1623.35   7
   0  -4  10 60912.7 1634.19   8
   0   4  10 65347.0 2053.99   7
   1  -4  10 20819.2 1015.58   8
   1   4  10 25098.5 1347.26   7
   2  -4  10 53405.1 1567.72   8
   2   4  10 57372.8 2028.02   7
   3  -4  10 14292.9 943.715   8
   3   4  10 15496.0 1225.05   7
   4  -4  10 116042. 2405.49   8
   4   4  10 125586. 3287.38   7
   4   4  10 121715. 2686.62   2
   5  -4  10 77510.5 2026.41   8
   5   4  10 79282.7 2350.29   2
   6   4  10 13802.8 1003.61   1
   6   4  10 14982.4 1260.43   2
   7   4  10 94822.1 2599.28   1
   7   4  10 100735. 3039.99   2
   8   4  10 5317.26 897.168   1
   8   4  10 9283.29 1366.41   2
   8   4  10 8458.39 1225.15   9
   9   4  10 147070. 3541.83   9
   9   4  10 156898. 3742.69   2
  10   4  10 29290.2 1591.68   9
  10   4  10 31310.7 1610.23   2
  11   4  10 63793.1 1889.82   9
  11   4  10 61409.8 1906.86   2
  12   4  10 59646.8 1674.87   2
  13   4  10 7097.84 631.671   2
  14   4  10 42625.3 1082.58   2
 -14  -5  10 258.391 338.864  10
 -13   5  10 9908.07 778.525  13
 -13  -5  10 11924.7 659.149  10
 -12   5  10 985.305 715.758  13
 -12  -5  10 1478.16 518.209  10
 -11   5  10 3444.41 847.432  13
 -11  -5  10 4197.97 652.424  10
 -10   5  10 9099.45 1161.53  13
 -10  -5  10 11985.1 987.025  10
  -9   5  10 9251.55 1246.48  13
  -9  -5  10 9271.49 1048.45  10
  -8   5  10 15462.5 1437.38  13
  -8  -5  10 12329.8 1303.66  10
  -7   5  10 506.723 977.656  13
  -7  -5  10 906.266 892.979  10
  -6   5  10 22324.0 1692.03  13
  -6   5  10 18887.2 2122.65   3
  -5   5  10 196.722 919.804  13
  -5   5  10 126.893 1667.96   3
  -4   5  10 25667.8 1678.23  13
  -4   5  10 19706.2 2467.27   3
  -3   5  10 1440.63 888.000  13
  -3   5  10 1331.48 1988.49   3
  -2   5  10 966.463 841.820  13
  -2   5  10 1924.00 1956.71   3
  -1   5  10 12146.4 1170.61  13
  -1   5  10 12867.1 2730.80   3
  -1   5  10 9820.93 991.299   7
   0  -5  10 6939.26 689.136   8
   0   5  10 6075.62 2388.13   3
   0   5  10 7683.73 936.759   7
   1   5  10 624.551 1859.06   3
   1  -5  10-45.4391 558.426   8
   1   5  10-1.90053 646.014   7
   2   5  10 120.871 662.585   7
   2   5  10 1343.97 1825.05   3
   2  -5  10 447.442 523.560   8
   3   5  10 1541.16 734.404   7
   3   5  10 1887.19 1433.33   3
   3  -5  10 1459.95 533.535   8
   4  -5  10 11277.9 906.900   8
   4   5  10 11999.7 1856.63   3
   4   5  10 10367.1 1221.97   7
   5  -5  10 10992.6 898.262   8
   5   5  10 9612.35 1541.22   3
   6   5  10 1967.12 894.436   9
   6  -5  10 2589.58 717.751   8
   7   5  10 498.526 818.519   9
   8   5  10 19933.5 1475.72   9
   9   5  10 1548.68 776.447   9
  10   5  10 20451.1 1183.79   9
  11   5  10 3160.28 567.376   9
  12   5  10 1988.19 459.308   9
 -12  -6  10 69525.3 1100.39  10
 -11   6  10 3347.02 664.236  13
 -11  -6  10 4065.13 515.636  10
 -10   6  10 55404.5 1717.92  13
 -10  -6  10 69270.7 1459.64  10
  -9   6  10 19280.7 1274.51  13
  -8   6  10 25054.2 1480.35  13
  -7   6  10 57023.9 2155.24  13
  -6   6  10 8241.14 1144.04  13
  -6   6  10 8587.04 1277.68   3
  -5   6  10 103894. 2859.80  13
  -5   6  10 99481.2 3531.06   3
  -4   6  10 8436.02 1123.51  13
  -4   6  10 6835.52 1462.77   3
  -3   6  10 66266.0 2199.05  13
  -3   6  10 59321.8 3115.52   3
  -2   6  10 65522.8 2118.59  13
  -2   6  10 64593.9 3392.49   3
  -1   6  10 48183.3 1807.76  13
  -1   6  10 42284.3 2832.26   3
   0   6  10 159201. 3013.14  13
   0   6  10 138864. 4839.47   3
   1   6  10 321.700 1222.00   3
   2   6  10 151140. 4640.62   3
   3   6  10 20097.3 1504.46   9
   3   6  10 23225.0 1907.87   3
   4   6  10 46011.6 2101.03   9
   4   6  10 54362.6 2541.96   3
   5   6  10 66658.6 1907.29  11
   5   6  10 65187.8 2536.20   3
   6   6  10 24385.7 1215.26  11
   6   6  10 24479.2 1552.80   9
   7   6  10 81561.4 2037.96  11
   7   6  10 78947.7 2442.41   9
   8   6  10 1555.20 532.399  11
   8   6  10 2101.89 654.273   9
   9   6  10 57326.3 1544.27  11
   9   6  10 53740.3 1603.01   9
  10   6  10 31496.8 1069.03  11
  10   6  10 31226.8 1100.07   9
  11   6  10 24074.6 843.360  11
  11   6  10 24307.6 838.968   9
  -8   7  10 3999.33 760.540  13
  -7   7  10 2689.50 770.182  13
  -6   7  10 18163.4 1198.38  13
  -5   7  10 424.647 681.752  13
  -4   7  10 14581.5 1112.71  13
  -4   7  10 13889.3 1302.01   3
  -3   7  10 7091.22 1094.18   3
  -2   7  10 13700.8 1395.20   3
  -1   7  10 16749.9 1529.14   3
   0   7  10 5424.67 1051.19   3
   1   7  10 27028.5 1534.25   9
   1   7  10 24613.5 1712.32   3
   2   7  10 3971.26 914.317   9
   2   7  10 3515.08 931.165   3
   3   7  10 7949.74 1013.49   9
   3   7  10 6598.22 938.191   3
   4   7  10 9660.40 1001.77   9
   4   7  10 8406.52 942.950   3
   5   7  10 8352.94 870.986   9
   6   7  10 20235.3 899.534  11
   6   7  10 19467.3 1034.03   9
   7   7  10 1412.16 461.367  11
   7   7  10 1115.18 474.042   9
   8   7  10 13548.4 678.383  11
   8   7  10 13718.2 718.617   9
   9   7  10 7139.83 495.546   9
  -3   8  10 49747.9 1451.94  15
  -2   8  10 13855.5 936.997  15
  -1   8  10 9469.55 865.481  15
   0   8  10 52450.5 1621.34  15
   1   8  10-82.5524 576.458  15
   2   8  10 46527.0 1368.31  15
   3   8  10 8327.09 660.977  15
  16   0 -11 74.2740 347.586  14
  15   0 -11-152.457 467.512  14
  14   0 -11-90.2009 532.951  14
 -14   0  11-158.563 546.979  10
  13   0 -11 150.262 647.798  14
 -13   0  11-39.1733 589.011  10
  12   0 -11 672.151 797.216  14
 -12   0  11-0.66951 634.182  10
  11   0 -11-19.8001 1229.87  14
 -11   0  11 373.375 674.898  10
  11   0 -11 361.526 1497.60   1
  10   0 -11-91.5830 1001.41  14
 -10   0  11 457.105 749.618  10
  10   0 -11-234.021 992.432   1
  -9   0  11 455.358 769.209  10
  -9   0  11 222.850 987.439   8
  -8   0  11 228.229 796.602  10
  -8   0  11 237.167 884.881   8
  -7   0  11 121.755 776.082   8
  -6   0  11 60.5678 710.695   8
  -5   0  11-29.1027 637.231   8
  -4   0  11 126.959 581.119   8
  -3   0  11 133.411 519.876   8
  -2   0  11-8.77187 517.810   8
  -1   0  11 106.836 467.953   8
   0   0  11 247.139 428.107   8
   1   0  11 46.2305 486.479   8
   2   0  11 215.390 487.409   8
   3   0  11 326.322 503.736   8
   4   0  11 20.5198 514.224   8
   5   0  11 289.815 588.264   8
   6   0  11 142.543 433.264   1
   6   0  11-18.7170 649.555   8
   7   0  11 182.661 482.181   1
   8   0  11 617.183 561.174   1
   8   0  11 26.6046 786.308   2
   9   0  11 251.086 660.251   1
   9   0  11 194.972 907.883   2
  10   0  11-132.313 719.209   1
  10   0  11 338.830 957.745   2
  11   0  11 141.467 751.581   1
  11   0  11-69.2976 803.936   2
  12   0  11 185.360 650.212   2
  12   0  11 312.142 648.991  12
  13   0  11 0.66807 537.819   2
  13   0  11 61.6579 538.518  12
  14   0  11-93.7918 425.196   2
  14   0  11 135.902 534.188  12
  15   0  11 148.726 334.736   2
  15   0  11-155.845 429.069  12
  16   0  11 295.926 410.401  12
  17   1 -11 12876.7 524.238  14
  16   1 -11 64611.6 1321.03  14
  15   1 -11 637.734 426.454  14
 -15  -1  11 149.075 436.716  10
  14   1 -11 93533.7 2111.96  14
 -14  -1  11 90403.2 1873.30  10
  13   1 -11 24857.5 1322.28  14
 -13  -1  11 22843.1 1169.81  10
  12   1 -11 61588.8 2214.43  14
 -12   1  11 61135.4 1756.24  10
 -12  -1  11 57772.3 1827.63  10
  11   1 -11 67787.2 2610.58  14
 -11   1  11 66804.8 1915.99  10
 -11  -1  11 62523.2 2011.23  10
  11   1 -11 69759.8 3402.35   1
  10   1 -11 21813.2 1544.70  14
 -10   1  11 20521.2 1221.93  10
 -10  -1  11 19081.0 1342.77  10
 -10  -1  11 23363.4 1713.84   8
   9   1 -11 124747. 3054.78  14
  -9   1  11 118785. 2622.94  10
  -9  -1  11 121170. 3274.18   8
   8   1 -11 2699.92 734.696  14
  -8   1  11 2740.85 841.191  10
  -8  -1  11 2954.66 1053.68  10
  -8  -1  11 2686.72 911.440   8
  -8   1  11 2242.62 1144.56   8
  -7  -1  11 146605. 3126.67   8
  -7   1  11 150021. 3587.40   8
  -6  -1  11 66937.1 2020.35   8
  -6   1  11 67501.9 2332.63   8
  -5  -1  11 41799.7 1527.51   8
  -5   1  11 41723.4 1749.58   8
  -4  -1  11 148488. 2679.43   8
  -4   1  11 155911. 2973.88   8
  -3  -1  11 21100.4 1081.94   8
  -3   1  11 21888.7 1186.78   8
  -2  -1  11 184876. 2804.80   8
  -2   1  11 199972. 3020.27   8
  -1  -1  11 23765.5 1062.66   8
  -1   1  11 27556.6 1193.22   8
   0  -1  11 177456. 2679.53   8
   0   1  11 204693. 2854.52   8
   1  -1  11 180941. 2701.27   8
   2  -1  11 34350.0 1274.07   8
   3  -1  11 223026. 3134.79   8
   4   1  11 2668.80 504.292   1
   4  -1  11 4132.52 674.738   8
   5  -1  11 129431. 2622.52   8
   5   1  11 128292. 2650.67   1
   6  -1  11 42636.8 1656.19   8
   6   1  11 45702.3 1721.77   1
   7   1  11 95237.8 2655.25   1
   7   1  11 93418.3 2499.64   2
   8   1  11 60828.5 2360.35   1
   8   1  11 58794.4 2205.74   2
   9   1  11 7150.48 1151.44   1
   9   1  11 9314.56 993.257  12
  10   1  11 100143. 3178.62   1
  10   1  11 96467.1 3348.78   2
  11   1  11 554.218 685.983   1
  11   1  11 429.513 606.807  12
  11   1  11 383.109 815.723   2
  12   1  11 105359. 2314.98  12
  12   1  11 107450. 2762.10   2
  13   1  11 36791.7 1364.19  12
  13   1  11 39569.7 1526.53   2
  14   1  11 59775.3 1558.65  12
  14  -1  11 61976.5 1611.49  12
  14   1  11 62613.4 1645.94   2
  15   1  11 55445.3 1348.30  12
  15  -1  11 53957.0 1354.32  12
  15   1  11 54201.4 1332.52   2
  16   1  11 1738.81 342.029   2
  16  -1  11 1350.92 407.172  12
  16   2 -11 31.1157 324.262  14
 -16  -2  11 112.670 380.946  10
  15   2 -11 610.577 388.445  14
 -15  -2  11 675.603 477.228  10
  14   2 -11 108.004 445.833  14
 -14  -2  11 875.825 546.213  10
  13   2 -11 332.474 556.052  14
 -13  -2  11 221.821 600.247  10
  12   2 -11 3401.92 796.364  14
 -12  -2  11 3025.33 721.424  10
  11   2 -11 6743.77 1004.47  14
 -11  -2  11 5667.77 927.179  10
  11   2 -11 5505.10 1148.04   1
  10   2 -11 27517.6 1592.21  14
 -10   2  11 21566.2 1229.14  10
 -10  -2  11 26543.6 1544.03  10
 -10  -2  11 30178.0 1920.12   8
  10   2 -11 27602.3 2492.20   1
   9   2 -11 4916.44 876.696  14
  -9   2  11 2304.93 745.130  10
  -9  -2  11 3705.35 1014.58  10
   9   2 -11 4593.34 1258.51   1
  -9  -2  11 5113.26 1013.59   8
   8   2 -11 251.922 635.077  14
  -8   2  11-137.504 700.156  10
  -8  -2  11 69.2652 1095.33  10
  -8  -2  11 684.231 746.818   8
   7   2 -11 26.1832 553.167  14
  -7   2  11 234.097 706.373  10
  -7  -2  11 327.237 944.151  10
  -7  -2  11 427.753 716.971   8
  -6  -2  11 13800.1 1046.49   8
  -6   2  11 14244.1 1609.61   8
  -5  -2  11 238.846 529.095   8
  -4  -2  11 2948.31 653.598   8
  -3  -2  11 3860.20 651.784   8
  -2  -2  11 4067.95 648.333   8
  -1  -2  11 6349.64 670.694   8
   0  -2  11 12230.4 838.115   8
   1  -2  11 2105.51 509.146   8
   2  -2  11 16381.6 952.366   8
   3  -2  11 2816.08 631.132   8
   4   2  11 832.905 442.849   1
   4  -2  11 266.089 592.956   8
   5   2  11 868.791 494.348   1
   5  -2  11 1747.44 629.901   8
   6   2  11 1656.89 562.216   1
   6   2  11 1400.48 642.055   2
   7   2  11 4289.38 844.044   1
   7   2  11 3341.00 1012.57  12
   7   2  11 3429.50 793.724   2
   8   2  11 7034.97 1171.65   1
   8   2  11 5819.23 931.774  12
   8   2  11 7925.02 1082.58   2
   9   2  11 7894.64 1430.04   1
   9   2  11 8644.89 979.338  12
   9   2  11 7130.08 1230.19   2
  10   2  11-13.0779 961.430   1
  10   2  11 260.105 679.196  12
  10   2  11-621.478 1019.44   2
  11   2  11 1655.34 666.083  12
  11   2  11 870.159 828.223   2
  12   2  11 163.628 655.735   2
  12   2  11 121.765 577.682  12
  13   2  11 1640.08 600.669   2
  13   2  11 1966.32 568.778  12
  14   2  11 580.353 454.976   2
  15   2  11 1391.59 415.869   2
  15  -2  11 631.728 447.178  12
  16  -2  11 4348.99 423.058  12
  16   2  11 4517.09 394.194   2
  16   3 -11 65743.9 1030.83  14
  15   3 -11 302.420 345.494  14
 -15  -3  11 827.780 418.978  10
  14   3 -11 75978.9 1620.78  14
 -14   3  11 71793.0 1836.40  13
  13   3 -11 15108.5 925.671  14
 -13  -3  11 16335.4 975.432  10
  12   3 -11 86954.8 2197.53  14
 -12  -3  11 84392.4 2071.07  10
  11   3 -11 81725.6 2353.24  14
 -11  -3  11 79493.0 2195.76  10
  10   3 -11 11304.9 1073.78  14
 -10  -3  11 9789.97 1162.20  10
   9   3 -11 125980. 2925.37  14
  -9  -3  11 119358. 3290.24  10
   8   3 -11 7216.34 882.293  14
  -8  -3  11 6000.62 1571.72  10
  -8  -3  11 8035.75 1168.02   8
   8   3 -11 7835.45 1621.95   1
   7   3 -11 73171.3 2126.17  14
  -7  -3  11 77903.1 2873.82  10
  -7  -3  11 82022.7 2343.96   8
   6   3 -11 48329.0 1701.67  14
  -6  -3  11 55190.5 2213.36  10
  -6  -3  11 54013.1 1838.13   8
  -5   3  11 32804.9 1228.56   2
  -5  -3  11 35435.0 1612.20  10
  -5  -3  11 34899.3 1444.07   8
  -4  -3  11 157998. 2853.80   8
  -3  -3  11 1267.94 567.025   8
  -2  -3  11 159558. 2709.90   8
  -1  -3  11 23631.2 1096.96   8
   0  -3  11 158584. 2654.60   8
   1  -3  11 79009.9 1909.33   8
   2  -3  11 113610. 2301.30   8
   3  -3  11 152552. 2729.09   8
   4  -3  11 10478.4 917.692   8
   4   3  11 9635.31 834.549   1
   4   3  11 9836.29 900.096   2
   5  -3  11 282642. 3947.13   8
   5   3  11 288687. 4202.64   1
   6  -3  11 14177.7 1091.32   8
   6   3  11 13411.8 1091.72   1
   6   3  11 13444.1 1113.52   2
   7   3  11 54546.0 2124.49   1
   7   3  11 56909.0 2176.55   2
   8   3  11 84661.4 2841.22   1
   8   3  11 86497.7 2879.07   2
   9   3  11 41711.8 1923.61   9
   9   3  11 38246.5 2176.59   1
   9   3  11 35636.7 2116.31   2
  10   3  11 142652. 3709.49   2
  11   3  11 1727.79 761.569   2
  12   3  11 77871.7 2114.83   2
  13   3  11 48543.2 1490.69   2
  14   3  11 18061.4 841.240   2
  15  -3  11 77168.1 1349.82  12
  15   3  11 78194.5 1339.53   2
 -15  -4  11 1652.02 332.591  10
 -14   4  11 145.929 509.227  13
 -14  -4  11 1108.53 424.499  10
  13   4 -11 7607.37 606.352  14
 -13   4  11 6035.03 832.437  13
 -13  -4  11 6227.65 633.333  10
  12   4 -11 2102.69 538.192  14
 -12   4  11 2480.86 795.061  13
 -12  -4  11 1744.01 578.492  10
  11   4 -11 12397.4 931.864  14
 -11   4  11 10425.7 1166.25  13
 -11  -4  11 10942.1 926.795  10
  10   4 -11 1091.99 647.668  14
 -10   4  11 1974.84 960.711  13
 -10  -4  11 1523.82 777.002  10
   9   4 -11 313.693 579.950  14
  -9   4  11 181.784 907.236  13
  -9  -4  11 108.007 892.665  10
   8   4 -11 4262.11 734.184  14
  -8  -4  11 3358.34 1421.25  10
   8   4 -11 4830.78 1195.42   1
  -7  -4  11-131.688 1105.39  10
   7   4 -11-783.599 1580.66   1
  -6  -4  11 1723.22 1035.43  10
  -6  -4  11 2294.91 828.989   8
   6   4 -11 2697.01 1379.77   1
  -5  -4  11 952.716 604.387   8
  -4  -4  11 3183.96 727.206   8
  -3   4  11 9814.61 1193.56  13
  -3  -4  11 8320.13 819.930   8
  -2   4  11 506.384 948.012  13
  -2  -4  11 24.1079 543.579   8
  -1  -4  11 5863.15 691.006   8
   0  -4  11 2740.96 591.177   8
   1   4  11 2565.47 759.031   7
   1   4  11 2949.69 661.130   2
   1  -4  11 2591.89 602.909   8
   2  -4  11 13950.5 909.376   8
   2   4  11 15946.5 1287.47   7
   2   4  11 16968.6 1083.35   2
   3   4  11 4628.42 716.027   2
   3  -4  11 4885.05 717.299   8
   4  -4  11 15069.8 1002.49   8
   4   4  11 11161.9 959.038   2
   5   4  11-9.43911 659.397   2
   5   4  11 69.1895 570.128   1
   5  -4  11 415.383 651.604   8
   6   4  11 3396.99 727.328   1
   6   4  11 4116.80 928.195   2
   6  -4  11 4363.03 853.269   8
   7   4  11 2429.94 755.631   1
   7   4  11 994.776 932.180   2
   7  -4  11 2136.63 806.969   8
   8   4  11 5897.96 1152.94   2
   8   4  11 5468.92 1039.35   9
   9   4  11 3661.48 959.490   2
   9   4  11 3123.05 952.164   9
  10   4  11-218.317 694.427   2
  10   4  11-49.9788 659.555   9
  11   4  11 2424.90 642.492   2
  11   4  11 2268.75 562.403   9
  12   4  11 5780.60 619.297   2
  13   4  11 232.827 363.043   2
  14   4  11 1070.10 310.003   2
 -13   5  11 12370.7 732.929  13
 -13  -5  11 16029.9 650.779  10
 -12   5  11 39473.2 1372.47  13
 -12  -5  11 44717.8 1150.19  10
 -11   5  11 41287.3 1599.20  13
 -11  -5  11 48760.7 1349.52  10
 -10   5  11 1818.19 856.662  13
 -10  -5  11 2336.05 677.665  10
  -9   5  11 89295.6 2649.30  13
  -9  -5  11 98102.7 2367.22  10
  -8   5  11 3457.33 1018.87  13
  -8  -5  11 4279.56 1046.27  10
  -7   5  11 78531.0 2703.92  13
  -6   5  11 33443.3 1910.79  13
  -6   5  11 34785.5 2533.33   3
  -5   5  11 60571.6 2367.45  13
  -5   5  11 61218.3 3524.70   3
  -4   5  11 91237.8 2770.75  13
  -4   5  11 90470.6 4439.04   3
  -3   5  11 833.690 844.539  13
  -3   5  11 1114.57 1881.83   3
  -2   5  11 139238. 3144.09  13
  -2   5  11 111565. 5502.23   3
  -1   5  11 15151.6 1186.60  13
  -1   5  11 16040.6 2715.36   3
   0   5  11 64578.7 4388.73   3
   0  -5  11 68011.6 1778.33   8
   1  -5  11 67825.6 1751.12   8
   1   5  11 73421.7 2440.91   7
   2   5  11 9195.97 1113.76   7
   2  -5  11 7737.55 810.543   8
   3  -5  11 122906. 2381.64   8
   3   5  11 126591. 4961.13   3
   3   5  11 126279. 3374.34   7
   4   5  11 5159.61 1493.91   3
   5   5  11 82061.0 3425.68   3
   6   5  11 20943.0 1530.43   9
   7   5  11 51103.0 2156.39   9
   8   5  11 59451.7 2184.60   9
   9   5  11 14079.2 1113.34   9
  10   5  11 73783.6 1866.48   9
  11   5  11 1009.77 441.489   9
  12   5  11 34231.5 990.579  11
  12   5  11 39213.4 939.027   9
 -11   6  11 4628.33 618.614  13
 -10   6  11 4874.75 721.096  13
  -9   6  11 24.9904 634.230  13
  -8   6  11 7509.68 972.834  13
  -7   6  11 3184.78 905.674  13
  -6   6  11 6641.76 1043.62  13
  -6   6  11 8260.82 1157.87   3
  -5   6  11 6341.98 1006.92  13
  -5   6  11 7089.64 1277.39   3
  -4   6  11 4385.13 879.738  13
  -4   6  11 4758.75 1289.07   3
  -3   6  11 10881.4 1080.47  13
  -3   6  11 7608.79 1426.80   3
  -2   6  11-134.179 649.046  13
  -2   6  11 224.667 1182.51   3
  -1   6  11 14694.2 1093.14  13
  -1   6  11 10288.1 1705.99   3
   0   6  11 2180.45 1256.74   3
   1   6  11 2522.42 1343.12   3
   2   6  11 6882.24 1435.99   3
   3   6  11 201.114 780.147   9
   3   6  11 300.327 924.219   3
   4   6  11 24036.6 1534.67   9
   4   6  11 27894.7 1791.28   3
   5   6  11 426.433 767.306   9
   5   6  11 442.680 758.481   3
   6   6  11 18457.3 1323.33   9
   7   6  11 8730.91 776.012  11
   7   6  11 7808.93 932.195   9
   8   6  11 8719.77 741.636  11
   8   6  11 8598.25 828.834   9
   9   6  11 6049.03 587.799  11
   9   6  11 5921.80 631.441   9
  10   6  11 275.734 344.062  11
  10   6  11 628.914 386.862   9
  -6   7  11 9901.29 916.300  13
  -4   7  11 49153.4 1950.63   3
  -3   7  11 17521.0 1380.10   3
  -2   7  11 77234.2 2658.12   3
  -1   7  11 5300.20 1061.46   3
   0   7  11 67946.0 2082.84   9
   0   7  11 62565.1 2446.16   3
   1   7  11 57940.8 1931.39   9
   1   7  11 54925.0 2198.32   3
   2   7  11 16996.5 1179.57   9
   2   7  11 16860.8 1276.00   3
   3   7  11 58446.2 1877.75   9
   3   7  11 54290.6 1945.60   3
   4   7  11 1867.40 651.974   3
   4   7  11 1603.40 669.409   9
   5   7  11 57769.3 1612.03   9
   6   7  11 5447.91 603.560   9
   7   7  11 44583.8 1144.62   9
   8   7  11 35288.6 902.281   9
  -1   8  11 26733.7 1050.42  15
   0   8  11 3335.35 585.429  15
  16   0 -12 29011.3 754.830  14
  15   0 -12 52548.3 1248.85  14
  14   0 -12 23619.7 1060.82  14
 -14   0  12 22236.3 967.636  10
  13   0 -12 109510. 2480.38  14
 -13   0  12 105169. 2080.82  10
  12   0 -12 141.505 821.402  14
 -12   0  12 349.049 620.199  10
  11   0 -12 126361. 3827.40  14
 -11   0  12 130033. 2694.00  10
  10   0 -12 64555.0 2608.69  14
 -10   0  12 56913.5 1932.33  10
  -9   0  12 128989. 2953.86  10
  -9   0  12 154705. 3969.65   8
  -8   0  12 28943.5 1568.00  10
  -8   0  12 29480.3 1815.46   8
  -7   0  12 6483.14 979.826  10
  -7   0  12 3889.63 1011.21   8
  -6   0  12 283120. 3927.90  10
  -6   0  12 271237. 4294.45   8
  -5   0  12 2099.93 764.184   8
  -4   0  12 74519.5 2086.37   8
  -3   0  12 115136. 2467.02   8
  -2   0  12 61698.6 1830.96   8
  -1   0  12 297455. 3742.73   8
   0   0  12 6320.87 753.253   8
   1   0  12 270539. 3469.37   8
   2   0  12 66742.1 1801.86   8
   3   0  12 274073. 3560.21   8
   4   0  12 180784. 2961.38   8
   5   0  12 49806.5 1705.08   8
   6   0  12 167578. 3092.48   2
   7   0  12 19968.3 1267.96   2
   8   0  12 87535.0 2654.47   2
   9   0  12 16429.4 1459.52   2
  10   0  12 28712.8 1396.15  12
  10   0  12 25410.3 1818.96   2
  11   0  12 110981. 2438.61  12
  11   0  12 115919. 2917.71   2
  12   0  12 6192.76 736.798  12
  12   0  12 5561.40 768.281   2
  13   0  12 108898. 2128.17  12
  13   0  12 115012. 2204.66   2
  14   0  12 9293.22 709.699  12
  14   0  12 10376.2 654.727   2
  15   0  12 64547.4 1332.34  12
  15   0  12 64542.3 1144.80   2
  16   1 -12 175.297 276.905  14
  15   1 -12 52.2622 375.025  14
 -15  -1  12 342.795 453.105  10
  14   1 -12 397.757 459.257  14
 -14  -1  12 295.540 511.051  10
  13   1 -12 5091.77 751.190  14
 -13   1  12 4965.33 731.722  10
 -13  -1  12 4667.82 738.393  10
  12   1 -12 7520.74 994.572  14
 -12   1  12 7354.22 858.115  10
 -12  -1  12 7613.60 837.942  10
  11   1 -12 6122.60 1118.59  14
 -11   1  12 6136.65 882.805  10
 -11  -1  12 6335.01 948.384  10
  10   1 -12 2138.08 905.119  14
 -10   1  12 2664.87 769.545  10
 -10  -1  12 1948.10 807.501  10
 -10  -1  12 2731.05 1171.17   8
  10   1 -12 2110.92 1268.66   1
   9   1 -12 3248.57 857.539  14
  -9   1  12 3153.95 821.187  10
  -9  -1  12 2398.23 1011.54  10
  -9  -1  12 2191.76 1042.27   8
   8   1 -12 2076.58 729.950  14
  -8   1  12 2408.76 827.664  10
  -8  -1  12 1611.86 1003.25  10
  -8  -1  12 2081.93 947.455   8
  -8   1  12 1633.36 1230.11   8
   7   1 -12 1506.88 703.114  14
  -7   1  12 2243.13 803.247  10
  -7  -1  12 1282.06 886.011  10
  -7  -1  12 1115.96 793.573   8
  -7   1  12 2243.18 994.188   8
   6   1 -12 4652.04 730.856  14
  -6   1  12 4917.49 845.926  10
  -6  -1  12 5867.47 955.735  10
  -6  -1  12 4976.94 856.783   8
  -6   1  12 4426.07 1081.35   8
  -5  -1  12 234.337 596.395   8
  -5   1  12 303.473 813.920   8
  -4  -1  12 306.794 542.682   8
  -4   1  12 745.898 751.794   8
  -3  -1  12 6117.82 775.969   8
  -3   1  12 6955.06 915.764   8
  -2  -1  12 705.660 557.427   8
  -2   1  12 732.978 686.180   8
  -1  -1  12 174.954 509.913   8
  -1   1  12 339.227 578.495   8
   0  -1  12 2224.59 554.373   8
   1  -1  12 602.223 494.040   8
   2  -1  12 6732.87 757.055   8
   3  -1  12 201.913 534.246   8
   4  -1  12 8199.85 853.246   8
   5  -1  12 6631.70 849.527   8
   5   1  12 7080.49 791.837   2
   6   1  12 4854.65 740.277   1
   6   1  12 5914.28 801.090   2
   6  -1  12 6734.91 986.102   8
   7   1  12 16900.5 1327.93  12
   7   1  12 13966.4 1172.54   1
   7   1  12 13902.3 1136.22   2
   8   1  12 26899.9 1692.73   1
   8   1  12 23425.2 1510.20   2
   9   1  12 1688.14 767.156  12
   9   1  12 2472.34 939.996   1
   9   1  12 2362.41 1006.38   2
   9  -1  12 2871.99 1441.32   8
  10   1  12 370.483 666.305  12
  10   1  12 199.709 997.560   2
  11   1  12 3175.18 747.574  12
  11   1  12 3642.15 878.907   2
  12   1  12 1230.19 619.126   2
  12   1  12 1072.26 574.482  12
  13   1  12 2149.64 556.518   2
  13   1  12 1775.77 550.725  12
  13  -1  12 2036.32 574.943  12
  14   1  12 165.074 422.339   2
  14   1  12 61.8111 459.605  12
  14  -1  12-132.517 471.109  12
  15   1  12 126.639 319.494   2
  15  -1  12 63.5386 403.918  12
  16   2 -12 44690.9 868.384  14
  15   2 -12 35039.8 978.168  14
 -15  -2  12 36961.8 977.337  10
  14   2 -12 12294.5 764.118  14
 -14  -2  12 12399.9 769.342  10
  13   2 -12 66844.8 1798.37  14
 -13  -2  12 63848.2 1657.99  10
  12   2 -12 415.510 608.581  14
 -12  -2  12 552.518 618.875  10
  11   2 -12 72390.7 2394.05  14
 -11   2  12 74859.8 1960.18  10
 -11  -2  12 69501.6 2104.07  10
  10   2 -12 10740.4 1152.20  14
 -10   2  12 12165.6 1056.91  10
 -10  -2  12 9498.48 1102.62  10
   9   2 -12 46051.1 1898.41  14
  -9   2  12 47432.1 1791.75  10
  -9  -2  12 48976.6 2233.61   8
   8   2 -12 152604. 3168.64  14
  -8   2  12 150382. 3050.42  10
   7   2 -12 12950.5 1051.31  14
  -7   2  12 12240.2 1138.88  10
  -7  -2  12 12820.8 1367.64  10
  -7  -2  12 13117.2 1143.19   8
   6   2 -12 141246. 2785.72  14
  -6   2  12 136314. 2781.35  10
  -6  -2  12 148577. 3182.27  10
  -6  -2  12 151973. 3073.58   8
   5   2 -12 34987.8 1377.87  14
  -5   2  12 35227.5 1496.86  10
  -5  -2  12 38577.4 1580.24  10
  -5  -2  12 37817.5 1562.80   8
  -4   2  12 193139. 2876.68   2
  -4  -2  12 191917. 3250.26   8
  -3  -2  12 102102. 2334.99   8
  -2  -2  12 63638.4 1837.49   8
  -1  -2  12 183565. 2953.04   8
   0  -2  12 8186.33 795.470   8
   1  -2  12 199735. 3092.36   8
   2  -2  12 9455.66 855.264   8
   3  -2  12 121246. 2549.83   8
   3   2  12 125029. 2451.50   2
   4  -2  12 104112. 2447.03   8
   4   2  12 97444.2 2288.07   2
   5  -2  12 25775.1 1367.24   8
   5   2  12 23970.2 1277.98   2
   6  -2  12 136974. 3105.96   8
   6   2  12 131529. 3116.09   1
   6   2  12 129853. 2892.95   2
   7   2  12 7118.14 1060.17  12
   7   2  12 5379.07 912.609   1
   7   2  12 6442.50 907.049   2
   7  -2  12 5917.03 1075.89   8
   8  -2  12 118811. 3480.65   8
   8   2  12 120810. 3659.74   1
   9   2  12 51805.5 1853.61  12
   9  -2  12 48440.5 2778.33   8
   9   2  12 42843.2 2633.82   1
   9   2  12 39850.3 2115.37   2
  10   2  12 42183.3 1612.29  12
  10   2  12 37175.5 2209.50   2
  11   2  12 88735.6 2123.63  12
  11   2  12 90116.7 2701.96   2
  12   2  12 7434.66 785.577  12
  12   2  12 7087.24 865.734   2
  13   2  12 124290. 2343.73   2
  14   2  12 1369.53 420.365   2
  14  -2  12 1687.16 483.721  12
  15  -2  12 54530.3 1126.60  12
  15   2  12 56363.4 1132.05   2
 -15  -3  12 938.207 363.796  10
  14   3 -12 174.160 351.792  14
 -14   3  12 8.49756 586.044  13
 -14  -3  12 354.748 442.096  10
  13   3 -12 747.286 467.153  14
 -13   3  12 887.375 670.925  13
 -13  -3  12 1092.57 524.984  10
 -13   3  12 924.940 423.658   2
  12   3 -12 525.737 545.859  14
 -12  -3  12 899.634 645.775  10
 -12   3  12 1078.27 469.310   2
  11   3 -12 3394.03 741.181  14
 -11  -3  12 3157.53 812.998  10
  10   3 -12 154.388 686.384  14
 -10  -3  12 394.135 850.935  10
   9   3 -12 2878.80 768.107  14
  -9  -3  12 2961.47 1188.65  10
   8   3 -12 418.920 585.395  14
  -8  -3  12 471.890 1422.34  10
  -8   3  12 1104.10 551.142   2
  -8  -3  12-156.465 879.041   8
   8   3 -12 2198.22 1171.31   1
   7   3 -12 861.639 625.307  14
  -7  -3  12 1023.26 1143.60  10
  -7   3  12 449.575 496.981   2
  -7  -3  12-52.1487 797.339   8
   6   3 -12 255.550 564.574  14
  -6  -3  12 264.821 907.054  10
  -6   3  12 183.492 484.360   2
  -6  -3  12 131.996 687.142   8
  -5  -3  12 2964.86 775.585  10
  -5   3  12 1239.08 446.368   2
  -5  -3  12 2245.33 666.411   8
  -4   3  12 817.510 473.767   2
  -4  -3  12 2070.61 638.596   8
  -3   3  12 1781.33 484.703   2
  -3  -3  12 4760.55 762.022   8
  -2   3  12 371.777 457.868   2
  -2  -3  12 389.502 545.424   8
  -1   3  12 556.657 456.644   2
  -1  -3  12 739.413 544.614   8
   0   3  12 3667.76 600.989   2
   0  -3  12 4755.59 680.196   8
   1   3  12 2255.74 551.732   2
   1  -3  12 2702.71 642.629   8
   2  -3  12 5656.75 709.955   8
   2   3  12 6396.81 781.180   2
   3   3  12 261.209 504.645   2
   3  -3  12 0.00000 517.285   8
   4   3  12 549.535 573.122   2
   4  -3  12 370.244 568.471   8
   5   3  12 158.484 612.083   2
   5  -3  12 406.443 622.976   8
   6   3  12 1207.14 656.876   2
   6   3  12-42.4104 627.498   1
   6  -3  12 622.672 748.658   8
   7   3  12 1704.48 715.124   1
   7   3  12 2175.62 803.404   2
   7  -3  12 1956.50 841.382   8
   8   3  12 3139.99 887.964   1
   8   3  12 2917.18 969.713   2
   8   3  12 3970.94 916.526   9
   9   3  12 2856.73 1054.06   2
  10   3  12 4501.11 970.164   2
  11   3  12 25.7064 629.504   2
  12   3  12 1148.59 515.568   2
  13   3  12 143.013 415.398   2
  14  -3  12 6730.59 561.519  12
  14   3  12 6804.62 531.410   2
 -14  -4  12 9494.67 511.530  10
 -13   4  12 31047.7 1199.23  13
 -13  -4  12 35398.3 1011.19  10
 -12   4  12-84.6605 688.690  13
 -12  -4  12 144.825 495.815  10
 -11   4  12 47032.2 1837.26  13
 -11  -4  12 54662.4 1595.86  10
 -10   4  12 13806.5 1314.26  13
 -10  -4  12 17845.5 1190.83  10
  -9   4  12 32858.6 1797.15  13
  -9  -4  12 41035.3 1878.79  10
  -8   4  12 73649.3 2585.45  13
  -8  -4  12 70990.6 2788.46  10
  -7   4  12 24962.6 1723.17  13
  -7  -4  12 19234.8 1504.52  10
  -6  -4  12 151889. 3155.34  10
  -6   4  12 161427. 5599.05   3
   6   4 -12 162547. 4928.81   1
  -5   4  12 7908.28 1220.59  13
  -5  -4  12 5984.37 861.720   8
  -4   4  12 98868.0 2890.11  13
  -4  -4  12 94870.2 2287.23   8
  -3   4  12 75639.1 2486.90  13
  -3  -4  12 68509.6 1937.92   8
  -2   4  12 41880.0 1838.63  13
  -2  -4  12 34260.3 1396.95   8
  -1  -4  12 109376. 2322.02   8
  -1   4  12 119135. 2332.27   2
   0   4  12 4345.39 636.945   2
   0  -4  12 4926.64 665.522   8
   1  -4  12 94996.7 2153.86   8
   1   4  12 62384.3 1782.55   2
   2  -4  12 28981.9 1276.91   8
   2   4  12 21703.2 1140.76   2
   3  -4  12 82857.9 2065.72   8
   3   4  12 58240.2 1866.99   2
   4  -4  12 56416.1 1780.43   8
   4   4  12 60281.6 2001.66   2
   5  -4  12 19206.0 1173.30   8
   5   4  12 20072.6 1323.63   2
   6   4  12 115639. 3040.52   2
   7   4  12 842.812 923.085   2
   7   4  12 721.745 812.947   9
   8   4  12 87029.6 2649.65   9
   8   4  12 92408.5 3034.35   2
   9   4  12 26977.4 1492.23   9
   9   4  12 30743.8 1626.03   2
  10   4  12 38918.8 1495.59   9
  10   4  12 38804.2 1529.95   2
  11   4  12 57965.7 1587.03   2
  12   4  12 2290.32 467.921   2
  13   4  12 36377.6 920.395   2
 -12   5  12 846.711 525.733  13
 -12  -5  12 1438.75 398.408  10
 -11   5  12 154.645 645.571  13
 -11  -5  12-321.956 444.310  10
 -10   5  12 1683.87 752.747  13
 -10  -5  12 2772.05 625.487  10
  -9   5  12 128.103 799.239  13
  -9  -5  12 623.353 669.368  10
  -8   5  12 3740.20 965.964  13
  -8  -5  12 2882.01 803.218  10
  -7   5  12 18135.4 1469.54  13
  -6   5  12-70.5360 916.072  13
  -6   5  12 650.908 1179.90   3
  -5   5  12 20528.8 1501.09  13
  -5   5  12 20138.7 2219.88   3
  -4   5  12 4816.83 960.384  13
  -4   5  12 4495.26 1711.02   3
  -3   5  12 17198.6 1300.12  13
  -3   5  12 12657.3 2255.89   3
  -2   5  12 12583.3 1099.28  13
  -2   5  12 10146.5 2136.55   3
  -1   5  12 3841.62 1972.95   3
   0   5  12 13425.6 2390.18   3
   1   5  12 4199.13 1984.69   3
   2   5  12 1747.64 1745.08   3
   3   5  12 1005.49 1335.44   3
   4   5  12 9925.98 1681.80   3
   5   5  12 21503.0 1862.97   3
   6   5  12 4485.72 962.853   9
   7   5  12 11792.6 1158.75   9
   8   5  12 2310.15 770.170   9
   9   5  12 7383.93 812.521   9
  10   5  12 4587.40 527.629  11
  10   5  12 6772.84 635.776   9
  11   5  12 626.846 341.751  11
  11   5  12 536.295 337.727   9
 -10   6  12 17099.3 876.535  13
  -9   6  12 18610.8 1030.97  13
  -8   6  12 33532.1 1404.31  13
  -7   6  12 1621.28 747.807  13
  -6   6  12 65432.2 2062.58  13
  -6   6  12 72347.8 2340.07   3
  -5   6  12 1838.78 733.668  13
  -5   6  12 1494.27 917.990   3
  -4   6  12 69722.4 2072.00  13
  -4   6  12 68882.9 2851.24   3
  -3   6  12 41057.9 1605.80  13
  -3   6  12 39036.5 2375.62   3
  -2   6  12 27045.3 1302.33  13
  -2   6  12 21839.3 2018.52   3
  -1   6  12 59145.3 2969.68   3
   0   6  12 2850.29 1154.94   3
   1   6  12 80209.2 3262.79   3
   2   6  12 15824.2 1588.23   3
   3   6  12 55719.8 2114.92   9
   3   6  12 55645.9 2429.67   3
   4   6  12 57055.6 2089.66   9
   4   6  12 63486.4 2367.35   3
   5   6  12 16919.1 1238.76   9
   5   6  12 15372.1 1206.59   3
   6   6  12 70408.8 2115.17   9
   7   6  12-33.5263 572.298   9
   8   6  12 73654.8 1682.77   9
   9   6  12 26241.6 892.334   9
  -4   7  12 5283.87 836.254   3
  -3   7  12 3939.88 795.206   3
  -2   7  12 10027.5 1100.25   3
  -1   7  12 907.937 702.876   3
   0   7  12 3547.93 794.387   9
   0   7  12 4558.70 895.887   3
   1   7  12-31.5272 654.581   9
   1   7  12 66.9460 679.193   3
   2   7  12 7246.28 835.684   9
   2   7  12 6753.74 905.478   3
   3   7  12 1699.19 648.921   9
   3   7  12 1380.87 623.481   3
   4   7  12 3674.16 646.884   9
   5   7  12 7398.24 620.418   9
   6   7  12 1832.60 413.643   9
 -14   0  13 242.139 479.883  10
  13   0 -13 942.846 519.524  14
 -13   0  13 307.892 565.589  10
  12   0 -13-481.457 669.154  14
 -12   0  13 374.137 593.658  10
 -11   0  13 185.420 617.171  10
 -10   0  13 164.607 742.120  10
  -9   0  13-98.0994 747.237  10
  -9   0  13 278.547 1221.60   8
  -8   0  13 7.65357 837.374  10
  -8   0  13 208.822 974.405   8
  -7   0  13-71.5396 758.673  10
  -7   0  13 605.344 972.349   8
  -6   0  13 301.840 693.479  10
  -6   0  13 244.811 772.000   8
  -5   0  13 15.5598 690.581  10
  -5   0  13 106.999 761.509   8
  -4   0  13-100.043 620.255  10
  -4   0  13-27.8830 459.261   2
  -4   0  13 113.041 665.334   8
  -3   0  13-10.9175 621.381  10
  -3   0  13 186.031 447.231   2
  -3   0  13-32.5195 653.756   8
  -2   0  13 61.2466 642.215   8
  -1   0  13 55.8624 625.469   8
   0   0  13 198.530 610.470   8
   1   0  13 356.600 582.769   8
   2   0  13 372.744 454.729   2
   2   0  13 37.9682 632.907   8
   3   0  13-28.5137 476.090   2
   3   0  13 234.725 669.513   8
   4   0  13 305.496 561.642   2
   6   0  13-178.426 608.206   2
   7   0  13 57.6228 648.066   2
   8   0  13 134.609 796.872  12
   8   0  13 15.3418 722.903   2
   9   0  13 491.843 725.614  12
   9   0  13 65.3135 853.001   2
  10   0  13 298.783 650.315  12
  10   0  13-251.770 888.288   2
  11   0  13-370.146 684.836   2
  11   0  13-44.0393 627.322  12
  12   0  13 157.143 504.615   2
  12   0  13 246.647 536.286  12
  13   0  13 67.2308 427.219   2
  13   0  13 52.3517 479.619  12
  14   0  13 16.0336 324.668   2
  14   0  13 114.816 419.761  12
  15   0  13 170.976 333.475  12
  15   1 -13 46690.6 1004.88  14
 -15  -1  13 46499.1 1007.11  10
  14   1 -13 18938.8 846.510  14
 -14  -1  13 19482.3 859.457  10
  13   1 -13 41090.4 1396.55  14
 -13   1  13 38405.0 1235.30  10
 -13  -1  13 38511.5 1269.56  10
  12   1 -13 75925.9 2185.50  14
 -12   1  13 76916.6 1841.96  10
 -12  -1  13 72331.9 1874.65  10
  11   1 -13 12678.4 1345.41  14
 -11   1  13 11582.1 1019.16  10
 -11  -1  13 12280.4 1058.99  10
  10   1 -13 87794.9 2857.89  14
 -10   1  13 90501.5 2298.80  10
 -10  -1  13 86743.6 2410.91  10
   9   1 -13 2441.70 836.515  14
  -9   1  13 2004.84 837.009  10
  -9  -1  13 1925.81 958.120  10
  -9  -1  13 1371.17 1023.12   8
  -8   1  13 83076.9 2431.67  10
  -8  -1  13 84705.0 2757.00  10
  -8  -1  13 90133.1 2874.85   8
   7   1 -13 28092.1 1369.30  14
  -7   1  13 24153.5 1394.38  10
  -7  -1  13 25120.4 1561.59  10
  -7  -1  13 27670.0 1663.27   8
   6   1 -13 33792.6 1405.30  14
  -6   1  13 28605.2 1431.84  10
  -6  -1  13 31033.1 1562.13  10
  -6  -1  13 29893.9 1608.10   8
  -5   1  13 100803. 2396.47  10
  -5  -1  13 105557. 2453.86  10
  -5  -1  13 100208. 2558.88   8
  -4   1  13 7195.74 725.111   2
  -4   1  13 5090.58 838.289  10
  -4  -1  13 5503.03 810.452  10
  -4  -1  13 6284.12 691.569   2
  -4  -1  13 5434.34 867.531   8
  -4   1  13 5285.83 982.511   8
  -3   1  13 158589. 2656.98   2
  -3  -1  13 167305. 2658.39   2
  -3   1  13 153059. 2748.17  10
  -3  -1  13 159921. 2720.52  10
  -3  -1  13 160431. 3032.87   8
  -3   1  13 170507. 3377.25   8
  -2   1  13 8907.20 759.537   2
  -2  -1  13 9754.54 778.516   2
  -2   1  13 9905.22 907.209  10
  -2  -1  13 9547.88 865.983  10
  -2  -1  13 9091.35 897.382   8
  -2   1  13 9807.76 1058.55   8
  -1   1  13 111890. 2222.20   2
  -1  -1  13 120280. 2565.23   8
   0   1  13 80830.2 1912.58   2
   0  -1  13 81344.1 2108.74   8
   1   1  13 77150.5 1877.35   2
   1  -1  13 76959.5 2047.87   8
   2  -1  13 150656. 2848.52   8
   2  -1  13 156196. 2568.92   2
   2   1  13 153196. 2640.13   2
   3  -1  13 5459.89 717.442   2
   3   1  13 4363.91 672.960   2
   3  -1  13 5740.61 798.869   8
   4  -1  13 150043. 2945.53   8
   4   1  13 141229. 2737.45   2
   5  -1  13 46936.4 1801.23   8
   5   1  13 50009.6 1759.84   2
   6  -1  13 46116.3 1868.90   8
   6   1  13 71741.6 2163.65   2
   7  -1  13 84504.4 2632.17   8
   7   1  13 88915.4 2557.89   2
   8   1  13 25980.3 1462.21  12
   8   1  13 19598.6 1440.03   2
   9   1  13 126895. 2710.33  12
   9   1  13 90492.1 2983.78   2
  10   1  13 11245.2 982.853  12
  10   1  13 10236.0 1331.76   2
  11   1  13 122019. 2409.56  12
  11  -1  13 126583. 2463.95  12
  11   1  13 124236. 2937.43   2
  12   1  13 44860.1 1406.38  12
  12  -1  13 44457.7 1413.61  12
  12   1  13 45650.4 1579.24   2
  13   1  13 24095.3 972.918  12
  13  -1  13 23626.4 981.574  12
  13   1  13 23919.2 1017.08   2
  14  -1  13 59381.0 1285.05  12
  14   1  13 60825.6 1262.83   2
 -15  -2  13 1729.88 380.830  10
  14   2 -13 2346.36 437.862  14
 -14  -2  13 2408.39 497.013  10
 -14   2  13 2282.78 413.543   2
  13   2 -13 2576.03 530.402  14
 -13  -2  13 2519.81 585.563  10
  12   2 -13 993.338 573.495  14
 -12  -2  13 780.156 606.301  10
  11   2 -13 7010.88 949.722  14
 -11  -2  13 6881.02 902.597  10
  10   2 -13 2986.21 875.980  14
 -10  -2  13 2222.94 868.091  10
   9   2 -13 947.616 708.957  14
  -9  -2  13 1504.81 988.958  10
   8   2 -13 514.037 625.062  14
  -8   2  13 452.672 801.965  10
  -8  -2  13-354.716 1123.94  10
  -8  -2  13 546.537 918.190   8
   7   2 -13 1625.05 675.733  14
  -7   2  13 948.610 717.830  10
  -7  -2  13 1368.81 985.979  10
  -7  -2  13 992.232 819.574   8
   6   2 -13 18730.8 1118.09  14
  -6   2  13 18082.2 1062.83   2
  -6  -2  13 19307.6 1364.22  10
  -6  -2  13 19943.0 1324.34   8
  -5   2  13 11263.5 853.813   2
  -5  -2  13 13581.7 1132.60  10
  -5  -2  13 14349.6 1102.25   8
  -4  -2  13 2006.98 758.567  10
  -4   2  13 1763.73 498.003   2
  -4  -2  13 2213.74 714.143   8
  -3   2  13 8095.34 734.161   2
  -3  -2  13 8142.63 827.763  10
  -3  -2  13 7945.88 860.477   8
  -2   2  13 354.010 467.943   2
  -2  -2  13 472.875 599.616   8
  -1   2  13 389.805 449.166   2
  -1  -2  13 536.137 593.825   8
   0   2  13 8578.14 754.679   2
   0  -2  13 9592.91 910.822   8
   1   2  13 3921.16 611.889   2
   1  -2  13 4907.66 728.541   8
   2   2  13 4226.08 648.273   2
   2  -2  13 4874.51 744.816   8
   3  -2  13 8296.76 878.540   8
   3   2  13 8609.26 811.353   2
   4   2  13 779.162 531.030   2
   4  -2  13 724.703 679.715   8
   5   2  13 664.222 562.514   2
   5  -2  13 931.470 762.784   8
   6   2  13 1047.57 669.221   2
   6  -2  13 754.176 826.212   8
   7   2  13 774.932 727.996   2
   7  -2  13 567.123 1127.85   8
   8   2  13 31077.0 1574.83  12
   8   2  13 20913.4 1541.19   2
   9   2  13 1127.17 740.368  12
   9   2  13 595.818 905.551   2
  10   2  13 426.940 644.446  12
  10   2  13 248.129 869.042   2
  11   2  13 6344.05 894.453   2
  12   2  13 146.509 508.395   2
  13   2  13 1347.82 442.789   2
  13  -2  13 1106.57 490.600  12
  14   2  13 1831.96 397.245   2
  14  -2  13 1948.50 423.918  12
 -14   3  13 9067.28 694.311  13
 -14  -3  13 10486.8 570.652  10
 -13   3  13 30913.7 1278.28  13
 -13  -3  13 35983.3 1081.11  10
 -12   3  13 43831.2 1234.56   2
 -12  -3  13 47768.3 1418.60  10
  11   3 -13 15659.8 1026.39  14
 -11   3  13 13335.2 845.069   2
 -11  -3  13 16723.3 1107.03  10
  10   3 -13 74279.0 2211.00  14
 -10   3  13 77269.4 1996.33   2
 -10  -3  13 78720.8 2304.47  10
   9   3 -13 2078.08 714.479  14
  -9  -3  13 2252.04 1125.84  10
  -9   3  13 2295.67 632.194   2
  -8   3  13 124225. 2554.95   2
  -8  -3  13 90671.4 3379.78  10
  -7   3  13 49664.2 1652.52   2
  -7  -3  13 46747.0 2277.15  10
  -6   3  13 115217. 2405.71   2
  -6  -3  13 118315. 2976.82  10
  -6  -3  13 117305. 2771.38   8
  -5   3  13 86084.3 2055.01   2
  -5  -3  13 93599.7 2406.22  10
  -5  -3  13 90458.9 2376.85   8
  -4   3  13 16645.5 992.884   2
  -4  -3  13 16947.6 1155.49   8
  -3   3  13 187566. 2970.70   2
  -3  -3  13 193041. 3271.83   8
  -2   3  13 6612.58 736.899   2
  -2  -3  13 6967.78 818.254   8
  -1   3  13 127073. 2448.96   2
  -1  -3  13 134806. 2676.90   8
   0  -3  13 116088. 2453.94   8
   0   3  13 119436. 2389.80   2
   1  -3  13 16608.3 1042.89   8
   1   3  13 16560.0 1011.48   2
   2  -3  13 141309. 2750.85   8
   2   3  13 139993. 2703.63   2
   3   3  13 2479.20 608.568   2
   3  -3  13 2341.64 706.132   8
   4  -3  13 118320. 2614.04   8
   4   3  13 118190. 2685.53   2
   5  -3  13 21300.0 1313.33   8
   5   3  13 20620.0 1287.11   2
   6  -3  13 103421. 2701.32   8
   6   3  13 92043.8 2616.28   2
   7   3  13 63698.2 2371.73   2
   8   3  13 10211.1 1094.12   9
   8   3  13 11315.1 1291.01   2
   9   3  13 135217. 3653.72   2
  10   3  13 3877.21 895.341   2
  11   3  13 89646.2 2148.14   2
  12   3  13 26121.7 1065.78   2
  13  -3  13 43258.5 1103.46  12
  13   3  13 43703.2 1113.08   2
 -13   4  13 2972.15 559.992  13
 -13  -4  13 4300.15 442.058  10
 -12   4  13 128.272 632.416  13
 -12  -4  13 484.646 451.165  10
 -11   4  13 2264.91 766.705  13
 -11  -4  13 2899.89 618.667  10
 -10   4  13 332.543 744.132  13
 -10  -4  13 937.949 635.366  10
  -9   4  13 3597.81 959.114  13
  -9  -4  13 3020.96 930.798  10
  -8   4  13 131.677 861.367  13
  -8  -4  13 326.067 1008.69  10
  -7   4  13 4087.41 1092.26  13
  -7  -4  13 2707.64 953.574  10
  -6   4  13 2662.43 1042.73  13
  -6   4  13 1738.85 1555.39   3
  -5   4  13 2108.92 978.081  13
  -4   4  13 11408.1 859.926   2
  -4   4  13 9545.69 1189.77  13
  -3   4  13 2931.93 907.549  13
  -3   4  13 2886.14 560.833   2
  -3  -4  13 2654.89 692.603   8
  -2   4  13 3320.46 601.288   2
  -2  -4  13 2660.69 716.191   8
  -1   4  13 3593.28 642.985   2
  -1  -4  13 4704.93 765.874   8
   0   4  13 225.410 556.481   2
   0  -4  13 554.241 593.317   8
   1   4  13 3276.34 634.258   2
   1  -4  13 2552.22 671.488   8
   2   4  13 2650.18 644.627   2
   2  -4  13 2942.76 655.908   8
   3   4  13 473.856 565.373   2
   4   4  13 2280.64 685.422   2
   5   4  13 4692.22 877.891   2
   5   4  13 5059.02 1457.35   3
   6   4  13 2125.32 844.806   2
   7   4  13 2018.48 959.822   2
   7   4  13 2244.04 846.091   9
   8   4  13 5929.01 1079.78   2
   8   4  13 6596.76 966.294   9
   9   4  13 961.240 640.037   2
   9   4  13 1463.59 705.382   9
  10   4  13 3680.44 610.377   2
  11   4  13-2.62804 412.368   2
  12   4  13 4408.85 449.887   2
 -11   5  13 549.017 523.342  13
 -11  -5  13 1358.72 406.675  10
 -10   5  13 40937.2 1466.76  13
 -10  -5  13 55473.4 1240.39  10
  -9   5  13 3713.83 843.236  13
  -9  -5  13 5255.79 701.861  10
  -8   5  13 44032.8 1798.31  13
  -7   5  13 26313.0 1547.43  13
  -6   5  13 39209.9 1848.82  13
  -6   5  13 37974.3 2237.95   3
  -5   5  13 72870.2 2358.71  13
  -5   5  13 68853.2 3245.80   3
  -4   5  13 1904.59 847.421  13
  -4   5  13 2427.47 1462.92   3
  -3   5  13 107806. 2658.32  13
  -3   5  13 93393.6 4337.80   3
  -2   5  13 6778.61 861.358  13
  -2   5  13 8753.82 1889.33   3
  -1   5  13 55049.4 3753.88   3
   0   5  13 45093.2 3438.38   3
   1   5  13 16084.5 2280.77   3
   2   5  13 92172.2 4132.23   3
   3   5  13-388.013 1252.55   3
   4   5  13 69398.3 3081.00   3
   5   5  13 16163.7 1265.82   9
   5   5  13 17534.9 1592.29   3
   6   5  13 55475.3 2059.49   9
   7   5  13 47272.3 1797.38   9
   8   5  13 8275.99 873.190   9
   9   5  13 86572.9 1779.38   9
  10   5  13 6913.83 518.998   9
  -9   6  13 6503.42 644.158  13
  -8   6  13 1977.22 616.420  13
  -7   6  13 4964.25 773.646  13
  -6   6  13 3966.74 770.093  13
  -6   6  13-374.888 663.151   3
  -5   6  13 2303.15 730.508  13
  -5   6  13 2122.54 847.583   3
  -4   6  13 11764.0 947.007  13
  -4   6  13 9655.05 1230.21   3
  -3   6  13 168.347 619.514  13
  -3   6  13 9.50102 895.066   3
  -2   6  13 19599.4 1657.56   3
  -1   6  13 7085.95 1322.41   3
   0   6  13 992.079 968.032   3
   1   6  13 3682.67 1085.31   3
   2   6  13 3121.31 823.936   9
   2   6  13 4228.31 996.045   3
   3   6  13 7831.52 949.609   9
   3   6  13 7447.94 1075.90   3
   4   6  13 389.535 662.942   9
   4   6  13-74.8439 633.322   3
   5   6  13 4417.42 790.958   9
   5   6  13 4776.54 727.078   3
   6   6  13 6345.39 806.961   9
   7   6  13 4151.49 603.099   9
   8   6  13 2773.44 435.378   9
  -2   7  13 2254.75 641.690   3
  -1   7  13 36586.8 1515.58   3
   0   7  13 12402.0 978.847   3
   1   7  13 23792.9 1068.56   9
   1   7  13 21307.6 1155.73   3
   2   7  13 36028.9 1186.95   9
   2   7  13 33663.0 1274.98   3
   3   7  13 1106.87 475.445   9
 -13   0  14 2627.81 565.162  10
 -12   0  14 130780. 2299.13  10
 -11   0  14 17083.6 1098.59  10
 -10   0  14 89578.7 2335.92  10
  -9   0  14 75045.2 2311.12  10
  -8   0  14 4471.83 1075.82  10
  -7   0  14 88337.2 2534.87  10
  -7   0  14 95416.7 3035.62   8
  -6   0  14 2294.27 865.209  10
  -6   0  14 2888.61 624.504   2
  -6   0  14 2311.82 1032.08   8
  -5   0  14 71485.8 1970.91   2
  -5   0  14 66994.0 2048.38  10
  -5   0  14 73240.8 2410.45   8
  -4   0  14 71028.8 1920.13   2
  -4   0  14 66076.7 1975.99  10
  -4   0  14 71064.5 2312.00   8
  -3   0  14 39669.9 1437.30   2
  -3   0  14 36908.6 1462.66  10
  -3   0  14 41521.1 1755.91   8
  -2   0  14 175998. 2878.88   2
  -2   0  14 173655. 2914.69  10
  -1   0  14 1874.48 542.114   2
  -1   0  14 1686.68 782.870   8
   0   0  14 248976. 3372.35   2
   0   0  14 178983. 3265.68   8
   1   0  14 14128.9 1098.97   8
   1   0  14 20113.1 1063.41   2
   2   0  14 184677. 3262.94   8
   2   0  14 161938. 2778.57   2
   3   0  14 135739. 2623.45   2
   4   0  14 14702.4 1008.81   2
   5   0  14 147325. 2928.54   2
   6   0  14 1279.61 689.503   2
   7   0  14 77378.5 2394.31   2
   8   0  14 23054.8 1568.72   2
   9   0  14 109574. 2480.53  12
   9   0  14 83256.4 2810.66   2
  10   0  14 49426.5 1627.31  12
  10   0  14 46131.4 1884.02   2
  11   0  14 3290.05 633.772   2
  11   0  14 4736.58 702.078  12
  12   0  14 120306. 2025.17  12
  12   0  14 121104. 2012.09   2
  13   0  14 1984.14 486.734  12
 -14  -1  14 1150.41 418.603  10
 -14   1  14 500.844 356.170   2
 -14  -1  14 691.642 338.115   2
 -13  -1  14 451.303 512.421  10
 -13   1  14 319.812 411.739   2
  12   1 -14 617.502 555.813  14
 -12  -1  14 420.701 562.833  10
  11   1 -14 1388.33 802.782  14
 -11   1  14 1261.79 650.140  10
 -11  -1  14 2206.96 731.789  10
  10   1 -14 803.486 909.756  14
 -10   1  14 784.408 726.612  10
 -10  -1  14 901.236 802.655  10
   9   1 -14 1013.60 847.492  14
  -9   1  14 621.733 825.035  10
  -9  -1  14 245.795 878.113  10
   8   1 -14 3.61308 701.823  14
  -8   1  14 14.4322 830.196  10
  -8  -1  14 480.413 1024.51  10
  -7   1  14 3076.79 913.343  10
  -7  -1  14 2650.14 920.345  10
  -7   1  14 3042.90 662.225   2
  -7  -1  14 2949.68 984.602   8
  -7   1  14 3097.54 1419.91   8
  -6   1  14 472.798 756.198  10
  -6  -1  14 560.871 812.258  10
  -6   1  14 190.165 506.188   2
  -6  -1  14 540.698 513.810   2
  -6  -1  14 539.197 777.651   8
  -6   1  14 555.267 1256.27   8
  -5   1  14 443.570 663.501  10
  -5  -1  14-422.510 675.492  10
  -5   1  14 75.9170 475.771   2
  -5  -1  14 116.309 510.037   2
  -5  -1  14 649.812 775.988   8
  -5   1  14 670.433 1165.11   8
  -4   1  14 8123.84 775.445   2
  -4  -1  14 8318.47 785.237   2
  -4   1  14 7110.32 906.383  10
  -4  -1  14 8656.70 877.999  10
  -4  -1  14 9737.78 1040.58   8
  -4   1  14 9139.17 1295.30   8
  -3  -1  14 440.838 686.019  10
  -3   1  14 271.870 496.214   2
  -3  -1  14 160.548 485.282   2
  -3  -1  14 426.368 657.391   8
  -2  -1  14 1377.78 660.180  10
  -2   1  14 1128.98 481.540   2
  -2  -1  14 1312.98 519.571   2
  -2  -1  14 764.147 657.746   8
  -1  -1  14 2105.34 558.421   2
  -1   1  14 1206.29 505.977   2
  -1  -1  14 2102.35 735.420   8
   0  -1  14 576.182 492.013   2
   0   1  14 1021.90 455.748   2
   0  -1  14 741.163 640.644   8
   1  -1  14 24284.7 1340.67   8
   1  -1  14 24650.9 1128.65   2
   1   1  14 23140.4 1127.61   2
   2  -1  14 846.842 559.954   2
   2   1  14 1008.53 486.459   2
   2  -1  14 536.104 629.330   8
   3  -1  14 1742.79 596.850   2
   3   1  14 1634.55 606.743   2
   3  -1  14 1728.12 748.464   8
   4   1  14 326.471 490.493   2
   4  -1  14 20.8323 741.041   8
   5   1  14 263.705 567.184   2
   5  -1  14 33.2348 872.393   8
   6  -1  14 7898.70 1159.41   8
   6   1  14 9517.59 965.715   2
   7   1  14 1803.66 724.218   2
   8   1  14 111.933 747.915   2
   9   1  14 11326.5 1070.60  12
   9  -1  14 12729.9 1068.58  12
  10   1  14 1504.20 693.425  12
  10  -1  14 1157.21 673.605  12
  10   1  14 986.840 788.874   2
  11   1  14 409.592 564.488  12
  11   1  14 139.039 599.263   2
  11  -1  14 268.471 561.675  12
  12   1  14 359.086 501.885  12
  12   1  14 343.818 465.406   2
  12  -1  14 476.540 517.688  12
  13   1  14 606.391 377.214   2
  13  -1  14 375.562 421.556  12
 -14   2  14 50867.7 1248.98  13
 -14  -2  14 60518.7 1117.57  10
 -13  -2  14 407.312 474.414  10
 -13   2  14 74.3863 366.729   2
 -13  -2  14 380.570 327.798   2
 -12   2  14 55604.5 1497.69   2
 -12  -2  14 60986.3 1564.69  10
 -11   2  14 25097.1 1218.63   2
 -11  -2  14 29131.4 1301.57  10
 -10   2  14 33912.9 1547.02   2
 -10  -2  14 31800.9 1544.95  10
  -9   2  14 79086.7 2269.75   2
  -9  -2  14 60549.6 2328.43  10
  -8   2  14 9676.68 915.454   2
  -8  -2  14 9549.59 1462.79  10
  -7   2  14 80027.4 2165.20   2
  -7  -2  14 76634.6 2572.20  10
  -6   2  14 27999.7 1300.11   2
  -6  -2  14 29048.0 1622.59  10
  -6  -2  14 28643.9 1607.99   8
  -5   2  14 89659.8 2171.43   2
  -5  -2  14 94046.0 2404.74  10
  -5  -2  14 91324.6 2493.85   8
  -4   2  14 22411.0 1160.58   2
  -4  -2  14 23910.8 1253.08  10
  -4  -2  14 23124.6 1330.96   8
  -3   2  14 20299.8 1094.34   2
  -3  -2  14 21939.8 1166.30  10
  -3  -2  14 23261.2 1319.77   8
  -2   2  14 103050. 2265.53   2
  -2  -2  14 108319. 2548.34   8
  -1   2  14 880.439 515.636   2
  -1  -2  14 1019.19 662.635   8
   0  -2  14 135964. 2812.97   8
   0   2  14 122968. 2462.30   2
   1  -2  14 19098.1 1195.99   8
   1   2  14 18327.3 1043.34   2
   2  -2  14 73725.8 2101.01   8
   2   2  14 67388.5 1909.88   2
   3  -2  14 89208.6 2359.75   8
   3   2  14 87133.1 2215.90   2
   4  -2  14 28081.3 1512.18   8
   4   2  14 24594.0 1300.30   2
   5  -2  14 120716. 2892.36   8
   5   2  14 112089. 2663.71   2
   6   2  14 486.057 656.813   2
   7   2  14 66670.2 2304.05   2
   8   2  14 15621.0 1381.10   2
   9   2  14 44034.2 2137.91   2
  10   2  14 43797.5 1864.14   2
  11  -2  14 8131.70 756.680  12
  11   2  14 7600.54 826.209   2
  12  -2  14 67768.6 1464.99  12
  12   2  14 71094.1 1620.54   2
  13   2  14 1175.34 385.708   2
  13  -2  14 1449.86 421.289  12
 -13   3  14 1846.34 576.818  13
 -13  -3  14 2951.76 443.860  10
 -12   3  14 2443.83 711.145  13
 -12  -3  14 3590.66 572.182  10
 -11   3  14-87.0688 728.833  13
 -11  -3  14 171.410 594.959  10
 -11   3  14-17.2062 432.875   2
 -10  -3  14 686.496 721.731  10
 -10   3  14 346.059 476.876   2
  -9  -3  14 688.803 1089.63  10
  -9   3  14 1226.66 597.806   2
  -8  -3  14 2549.59 1436.28  10
  -8   3  14 2762.41 612.248   2
  -7  -3  14 139.296 1098.39  10
  -7   3  14 20.4235 496.660   2
  -6  -3  14 1997.27 951.805  10
  -6   3  14 2210.26 612.885   2
  -5   3  14 6379.83 739.114   2
  -5  -3  14 7663.73 920.211  10
  -4   3  14 221.550 464.704   2
  -3   3  14 233.291 465.497   2
  -3  -3  14 192.449 655.845   8
  -2   3  14-43.3204 472.702   2
  -2  -3  14 182.879 713.535   8
  -1   3  14 2191.63 549.382   2
  -1  -3  14 2572.05 728.752   8
   0   3  14 1781.93 554.246   2
   0  -3  14 1796.10 630.852   8
   1   3  14 348.144 527.528   2
   1  -3  14 238.183 626.722   8
   2   3  14 1100.01 566.303   2
   2  -3  14 1315.91 599.718   8
   3   3  14 105.089 547.534   2
   3  -3  14 4.74062 674.951   8
   4   3  14 1437.28 634.846   2
   5   3  14 236.309 588.697   2
   6   3  14 1895.80 793.286   2
   7   3  14 5264.49 992.136   2
   7   3  14 5662.13 877.089   9
   8   3  14 4217.93 1004.03   2
   9   3  14 306.343 786.206   2
  10   3  14 2327.42 672.066   2
  11   3  14 1958.65 542.595   2
  12   3  14 816.544 384.872   2
  12  -3  14 1355.96 454.819  12
 -12   4  14 38984.1 1164.01  13
 -12  -4  14 43849.7 934.135  10
 -11   4  14 8039.30 864.897  13
 -11  -4  14 9614.90 656.434  10
 -10   4  14 22021.3 1258.82  13
 -10  -4  14 30133.4 1135.62  10
  -9   4  14 41988.9 1767.24  13
  -9  -4  14 48545.0 1626.08  10
  -8   4  14 2133.30 886.485  13
  -8  -4  14 2419.68 935.400  10
  -7   4  14 92087.7 2733.45  13
  -7  -4  14 86781.1 2255.94  10
  -6   4  14 1928.70 983.543  13
  -6   4  14 2245.90 1714.42   3
  -5   4  14 70890.7 2418.67  13
  -5   4  14 77040.6 1871.93   2
  -4   4  14 67799.2 2300.31  13
  -4   4  14 67752.0 1772.19   2
  -3   4  14 42928.6 1810.35  13
  -3   4  14 40054.4 1416.11   2
  -2   4  14 73090.5 1872.33   2
  -1   4  14 2319.73 613.959   2
   0   4  14 115396. 2420.03   2
   1   4  14 23470.7 1191.01   2
   2   4  14 72914.1 2047.44   2
   3   4  14 82701.4 2226.90   2
   4   4  14 31898.0 1521.50   2
   5   4  14 83538.6 3654.52   3
   5   4  14 77326.7 2326.58   2
   6   4  14 67.0274 797.318   2
   6   4  14 573.297 735.050   9
   7   4  14 84215.2 2359.17   9
   7   4  14 85259.7 2628.76   2
   8   4  14 21607.6 1204.24   9
   8   4  14 22761.1 1348.33   2
   9   4  14 20238.1 962.461   9
   9   4  14 20707.8 1050.27   2
  10   4  14 63901.2 1439.96   2
  11   4  14 12885.7 596.050   2
 -10   5  14 642.854 543.065  13
  -9   5  14 4980.75 774.516  13
  -8   5  14 4774.32 813.506  13
  -7   5  14 436.190 700.043  13
  -6   5  14 10846.9 1097.69  13
  -6   5  14 12917.2 1323.13   3
  -5   5  14 279.076 729.327  13
  -5   5  14 388.147 1081.82   3
  -4   5  14 4390.80 841.622  13
  -4   5  14 3279.36 1317.50   3
  -3   5  14 26686.3 1299.18  13
  -3   5  14 25077.6 2319.01   3
  -2   5  14 4874.28 1666.63   3
  -1   5  14 10858.3 1909.70   3
   0   5  14 129.811 1418.34   3
   1   5  14 12468.4 1905.84   3
   2   5  14 3641.54 1486.05   3
   3   5  14 10591.9 1473.17   3
   4   5  14 7917.79 1289.07   3
   5   5  14 3868.66 832.079   9
   5   5  14 3190.41 837.712   3
   6   5  14 18141.8 1177.88   9
   7   5  14 517.465 593.251   9
   8   5  14 5153.76 630.990   9
  -7   6  14 46328.1 1274.93  13
  -6   6  14 2873.25 671.350  13
  -5   6  14 40638.2 1336.49  13
  -5   6  14 39863.4 1552.64   3
  -4   6  14 21314.4 1020.58  13
  -4   6  14 19893.1 1317.74   3
  -3   6  14 16167.9 1353.27   3
  -2   6  14 45935.9 2088.30   3
  -1   6  14 785.507 906.557   3
   0   6  14 47334.7 2171.02   3
   1   6  14 6215.62 873.615   9
   1   6  14 9416.49 1113.51   3
   2   6  14 20120.2 1213.16   9
   2   6  14 21697.3 1372.41   3
   3   6  14 48491.6 1672.42   9
   3   6  14 44544.0 1702.00   3
   4   6  14 7822.46 859.386   9
   4   6  14 7535.39 805.374   3
   5   6  14 53506.5 1543.82   9
   6   6  14 2012.08 488.030   9
 -13   0  15 117.832 369.355   2
 -12   0  15 32.1813 524.637  10
 -12   0  15 165.839 490.709   2
 -11   0  15 15.3054 614.322  10
 -11   0  15 885.426 687.700   2
 -10   0  15 274.807 684.644  10
 -10   0  15-50.1584 946.274   2
  -9   0  15 433.257 769.382  10
  -9   0  15 167.754 870.909   2
  -8   0  15-51.9732 960.991  10
  -8   0  15 466.880 690.408   2
  -7   0  15 650.300 874.782  10
  -7   0  15-5.20696 616.491   2
  -6   0  15 114.968 833.183  10
  -6   0  15 83.9434 556.360   2
  -5   0  15-3.26452 746.499  10
  -5   0  15-81.7156 540.582   2
  -5   0  15 302.661 976.282   8
  -4   0  15 226.883 671.455  10
  -4   0  15-32.0259 478.088   2
  -4   0  15-54.1374 885.735   8
  -3   0  15 206.440 698.414  10
  -3   0  15 210.849 491.517   2
  -3   0  15 774.351 922.703   8
  -2   0  15-94.0744 445.531   2
  -1   0  15 2.04329 491.257   2
  -1   0  15-56.6923 884.524   8
   0   0  15-62.3616 475.092   2
   0   0  15 291.212 871.880   8
   1   0  15 2.71089 490.654   2
   3   0  15 277.796 561.069   2
   4   0  15-437.022 543.284   2
   5   0  15 31.8712 573.991   2
   6   0  15-156.781 648.438   2
   7   0  15-24.4930 779.988   2
   8   0  15-457.386 798.170   2
   9   0  15-465.569 810.307   2
  10   0  15 169.945 572.425   2
  11   0  15 27.5530 424.310   2
  11   0  15-19.0108 519.026  12
  12   0  15 158.617 448.986  12
 -13   1  15 29648.7 937.651   2
 -13  -1  15 30179.6 891.963   2
 -13  -1  15 29685.9 931.920  10
 -12   1  15 14648.1 851.091   2
 -12  -1  15 16155.5 869.430   2
 -12  -1  15 17276.5 895.979  10
 -11  -1  15 100446. 2330.45   2
 -11  -1  15 95647.9 2075.60  10
 -10  -1  15 400.130 688.510  10
 -10   1  15 747.042 729.659   2
 -10  -1  15 583.108 816.846   2
  -9   1  15 77048.7 2425.54   2
  -9  -1  15 69478.8 2323.87   2
  -8   1  15 53926.4 1963.19   2
  -8  -1  15 49510.4 1895.66   2
  -8   1  15 48452.0 1939.89  10
  -8  -1  15 45661.6 2121.00  10
  -7   1  15 40061.1 1642.56   2
  -7  -1  15 35778.6 1542.52   2
  -7   1  15 34081.4 1695.26  10
  -7  -1  15 34479.8 1813.77  10
  -6   1  15 87389.1 2271.06   2
  -6  -1  15 81120.8 2153.58   2
  -6  -1  15 87114.9 2468.10  10
  -5  -1  15 1366.18 810.216  10
  -5   1  15 916.976 515.050   2
  -5  -1  15 933.102 516.395   2
  -4   1  15 148693. 2816.67   2
  -4  -1  15 151397. 2790.73   2
  -4  -1  15 148634. 2902.01  10
  -4  -1  15 153366. 3282.91   8
  -3   1  15 26957.3 1261.99   2
  -3  -1  15 29170.8 1277.54   2
  -3  -1  15 28351.9 1369.89  10
  -3  -1  15 28863.2 1528.52   8
  -2  -1  15 88248.8 2096.85   2
  -2   1  15 84938.4 2102.32   2
  -2  -1  15 90556.9 2144.08  10
  -2  -1  15 90195.0 2466.14   8
  -1  -1  15 103820. 2234.58   2
  -1   1  15 99240.7 2265.07   2
   0  -1  15 35148.1 1661.80   8
   0  -1  15 33885.6 1323.42   2
   0   1  15 31128.1 1307.55   2
   1  -1  15 129909. 2510.58   2
   1   1  15 121333. 2482.26   2
   2  -1  15 4350.04 732.118   2
   2   1  15 4641.88 680.018   2
   2  -1  15 4105.87 921.003   8
   3  -1  15 126678. 2887.20   8
   3  -1  15 129284. 2606.12   2
   4   1  15 27992.9 1341.49   2
   5   1  15 51177.9 1822.77   2
   6   1  15 87216.3 2438.51   2
   7   1  15 12110.5 1137.54   2
   8   1  15 60167.5 2294.03   2
   9   1  15 7954.56 1165.03   2
  10   1  15 78475.5 2171.59   2
  11  -1  15 32557.9 1089.38  12
  11   1  15 34971.5 1231.97   2
  12  -1  15 11790.7 677.345  12
  12   1  15 14718.8 708.246   2
 -13   2  15 1322.61 562.568  13
 -13  -2  15 1665.49 421.392  10
 -12  -2  15 193.135 485.267  10
 -12   2  15 242.872 388.261   2
 -11   2  15 6645.25 696.971   2
 -11  -2  15 8305.98 809.367  10
 -10  -2  15 506.223 713.030  10
 -10   2  15 395.853 520.865   2
 -10  -2  15 441.850 559.609   2
  -9  -2  15 73.5750 913.103  10
  -9   2  15 76.1305 576.058   2
  -9  -2  15 263.440 600.751   2
  -8  -2  15 298.188 1144.95  10
  -8   2  15 82.8493 564.558   2
  -8  -2  15 41.5469 560.255   2
  -7   2  15 6260.84 812.848   2
  -7  -2  15 5407.43 1201.44  10
  -6  -2  15-28.5734 846.913  10
  -6   2  15 307.292 520.401   2
  -5  -2  15 1988.49 756.349  10
  -5   2  15 1965.00 574.597   2
  -4  -2  15 2830.65 705.635  10
  -4   2  15 2543.84 581.806   2
  -3   2  15 6636.71 741.075   2
  -2   2  15 224.064 459.849   2
  -2  -2  15 77.8543 656.347   8
  -1   2  15 677.418 470.985   2
  -1  -2  15 571.485 740.115   8
   0   2  15 397.554 468.775   2
   0  -2  15 475.289 638.150   8
   1  -2  15 6361.89 918.414   8
   1   2  15 5558.53 705.903   2
   2   2  15 999.135 556.843   2
   2  -2  15 697.813 781.408   8
   3   2  15 11045.2 904.900   2
   4   2  15 2289.78 639.919   2
   5   2  15 455.960 591.095   2
   6   2  15 5966.99 898.197   2
   7   2  15 1140.27 739.739   2
   8   2  15 1011.31 849.177   2
   9   2  15 2669.62 930.901   2
  10   2  15 318.155 559.202   2
  11   2  15 206.643 432.631   2
  11  -2  15-223.641 446.036  12
  12   2  15 2471.63 395.353   2
 -12   3  15 2322.61 592.199  13
 -12  -3  15 1692.25 427.076  10
 -11   3  15 45207.2 1115.24   2
 -11  -3  15 49072.7 1285.87  10
 -10   3  15 3843.32 852.949  13
 -10  -3  15 4675.96 727.988  10
 -10   3  15 4373.65 579.189   2
  -9   3  15 54361.8 1607.66   2
  -9  -3  15 54214.6 1919.91  10
  -8   3  15 19696.7 1119.47   2
  -8  -3  15 17448.3 1586.24  10
  -7   3  15 54926.9 1707.18   2
  -7  -3  15 50438.8 2017.32  10
  -6   3  15 103010. 2285.75   2
  -6  -3  15 96695.9 2440.76  10
  -5   3  15 15912.7 998.910   2
  -4   3  15 106020. 2295.20   2
  -3   3  15 4980.49 663.224   2
  -2   3  15 116134. 2388.59   2
  -1   3  15 29759.5 1277.34   2
   0   3  15 25622.8 1228.95   2
   1   3  15 135649. 2673.32   2
   2   3  15 894.823 589.412   2
   3   3  15 118250. 2609.92   2
   4   3  15 15106.9 1096.59   2
   5   3  15 57513.9 1982.16   2
   6   3  15 47056.2 1905.17   2
   7   3  15 13442.8 1198.74   2
   8   3  15 99188.8 2815.85   2
   9   3  15 986.494 640.491   2
  10   3  15 51660.3 1445.81   2
  11   3  15 38825.6 1038.23   2
 -10   4  15 991.987 648.516  13
 -10  -4  15 393.613 465.358  10
  -9   4  15 620.509 694.980  13
  -9  -4  15 788.298 594.151  10
  -8   4  15 3236.88 852.895  13
  -8  -4  15 2790.54 807.039  10
  -7   4  15 1146.93 818.933  13
  -6   4  15-272.868 787.188  13
  -6   4  15 321.512 486.397   2
  -6   4  15 281.458 1211.26   3
  -5   4  15 17982.0 1334.70  13
  -5   4  15 19828.3 2282.00   3
  -5   4  15 22032.4 1044.13   2
  -4   4  15 769.783 766.553  13
  -4   4  15 382.971 486.161   2
  -4   4  15 1421.86 1606.27   3
  -3   4  15 1361.69 562.004   2
  -2   4  15 8582.06 786.090   2
  -1   4  15 6084.11 702.158   2
   0   4  15 2400.80 589.208   2
   1   4  15 150.853 546.780   2
   2   4  15 4186.21 730.115   2
   3   4  15 3228.87 749.289   2
   3   4  15 2562.52 1325.09   3
   4   4  15 1716.45 712.765   2
   4   4  15 2456.25 1379.11   3
   5   4  15 3477.09 851.497   2
   5   4  15 4613.29 1294.10   3
   6   4  15 747.591 781.356   2
   6   4  15 289.973 662.501   9
   7   4  15 6746.55 841.110   9
   7   4  15 7582.01 957.295   2
   8   4  15 1282.59 563.293   2
   8   4  15 1279.89 547.990   9
   9   4  15 4000.75 524.704   2
  -8   5  15 14799.4 900.719  13
  -7   5  15 22034.2 1127.33  13
  -6   5  15 62815.0 1791.29  13
  -6   5  15 483.209 759.216   3
  -5   5  15 1300.05 703.820  13
  -5   5  15 1192.33 934.488   3
  -4   5  15 81189.2 1911.96  13
  -4   5  15 77792.1 2929.02   3
  -3   5  15 12965.8 1674.41   3
  -2   5  15 56515.1 2887.18   3
  -1   5  15 36777.5 2555.06   3
   0   5  15 15944.8 1856.70   3
   1   5  15 62170.2 2894.64   3
   2   5  15 39.5178 1017.38   3
   3   5  15 60966.0 2458.82   3
   4   5  15 9094.30 934.668   9
   4   5  15 9128.76 1087.63   3
   5   5  15 34715.0 1435.81   9
   6   5  15 43721.4 1467.72   9
   7   5  15 3894.68 579.113   9
  -3   6  15 9224.46 880.963   3
  -2   6  15-137.695 645.151   9
  -2   6  15 104.778 649.403   3
  -1   6  15 1408.07 666.687   9
  -1   6  15 1070.91 720.727   3
   0   6  15 4106.00 743.063   9
   0   6  15 4644.31 844.225   3
   1   6  15 2635.83 685.556   9
   1   6  15 2257.33 714.766   3
   2   6  15 5876.35 747.852   9
   2   6  15 5063.79 713.910   3
   3   6  15-250.908 545.850   9
   4   6  15 5917.33 650.260   9
 -12   0  16 16271.4 771.885   2
 -11   0  16 29207.4 1241.82   2
 -10   0  16 58509.9 2096.63   2
  -9   0  16 930.253 797.799  10
  -9   0  16 804.888 920.033   2
  -8   0  16 99642.1 2743.55   2
  -8   0  16 83259.8 2516.88  10
  -7   0  16 2390.29 945.178  10
  -7   0  16 2000.54 718.211   2
  -6   0  16 91300.5 2373.70   2
  -6   0  16 82105.5 2439.99  10
  -5   0  16 29382.2 1382.39   2
  -4   0  16 83721.7 2174.91   2
  -3   0  16 120513. 2537.27   2
  -2   0  16 6061.79 756.273   2
  -1   0  16 107209. 2344.00   2
   0   0  16 13075.6 931.150   2
   1   0  16 103889. 2327.64   2
   2   0  16 31892.8 1369.60   2
   3   0  16 23349.4 1232.25   2
   4   0  16 118342. 2591.18   2
   5   0  16 3292.58 738.044   2
   6   0  16 116218. 2756.65   2
   7   0  16 19808.7 1365.09   2
   8   0  16 82625.8 2540.89   2
   9   0  16 141083. 2644.87   2
  10   0  16 24156.9 956.164   2
 -12   1  16 661.946 374.517   2
 -12  -1  16 742.528 343.990   2
 -11  -1  16-148.677 560.224  10
 -11   1  16 186.226 487.463   2
 -11  -1  16 144.765 453.666   2
 -10  -1  16 845.274 653.476  10
 -10   1  16 228.584 617.927   2
 -10  -1  16 424.593 643.573   2
  -9  -1  16 91.2868 776.798  10
  -9   1  16 408.838 749.579   2
  -9  -1  16-223.577 758.174   2
  -8  -1  16 2432.72 1068.54  10
  -8   1  16 2036.47 736.562   2
  -8  -1  16 3246.18 776.327   2
  -7  -1  16 2657.08 951.073  10
  -7   1  16 2509.08 690.108   2
  -7  -1  16 2580.92 663.016   2
  -6  -1  16 2182.90 913.383  10
  -6   1  16 2007.66 613.992   2
  -6  -1  16 2390.77 659.324   2
  -5  -1  16 963.112 722.667  10
  -5   1  16-104.905 506.180   2
  -5  -1  16 99.1947 542.910   2
  -4  -1  16 4760.30 820.021  10
  -4  -1  16 4410.97 702.729   2
  -4   1  16 4077.45 671.752   2
  -3  -1  16 3385.53 594.728   2
  -3   1  16 2538.14 591.068   2
  -2  -1  16 988.688 520.958   2
  -2   1  16 685.640 519.277   2
  -1  -1  16 599.761 473.159   2
  -1   1  16 685.988 490.251   2
   0  -1  16 667.286 485.283   2
   0   1  16 519.432 471.731   2
   1  -1  16 11207.0 867.987   2
   1   1  16 10523.3 848.612   2
   2  -1  16 680.321 564.141   2
   2   1  16 1161.41 518.614   2
   3   1  16 1511.74 563.390   2
   4   1  16 184.707 594.287   2
   5   1  16 1466.32 634.406   2
   6   1  16-91.8291 647.811   2
   7   1  16 130.938 724.844   2
   8   1  16 1555.88 848.237   2
   9   1  16 1825.46 735.707   2
  10   1  16 2601.41 549.036   2
  11   1  16 429.889 347.129   2
 -11   2  16 42730.9 1159.08   2
 -11  -2  16 46883.5 1249.51  10
 -10   2  16 48371.9 1456.40   2
 -10  -2  16 57847.4 1626.94  10
  -9  -2  16 4784.65 948.749  10
  -9   2  16 4706.64 765.382   2
  -8   2  16 65424.2 1977.11   2
  -8  -2  16 53658.9 2474.79  10
  -7  -2  16 1721.87 1038.99  10
  -7   2  16 1181.77 605.570   2
  -6   2  16 77708.0 2088.04   2
  -6  -2  16 78122.2 2344.63  10
  -5   2  16 27136.3 1285.24   2
  -5  -2  16 28260.6 1424.07  10
  -4   2  16 32476.5 1358.49   2
  -4  -2  16 38108.7 1525.51  10
  -3   2  16 63966.4 1836.72   2
  -2   2  16 1609.07 532.703   2
  -1   2  16 113910. 2398.19   2
   0   2  16 16886.0 1035.22   2
   1   2  16 63684.6 1879.76   2
   2   2  16 92130.1 2261.70   2
   3   2  16 9350.90 877.489   2
   4   2  16 86475.3 2279.44   2
   5   2  16 287.277 581.839   2
   6   2  16 72200.9 2242.30   2
   7   2  16 14148.6 1217.46   2
   8   2  16 38699.6 1835.88   2
   9   2  16 44621.7 1593.91   2
  10   2  16 9812.46 710.467   2
 -10   3  16 1746.10 665.091  13
 -10  -3  16 1919.69 539.189  10
 -10   3  16 1376.55 394.562   2
  -9   3  16 82.1452 710.880  13
  -9  -3  16 377.198 693.555  10
  -9   3  16-95.3205 437.048   2
  -8   3  16 682.383 790.168  13
  -8  -3  16 961.833 949.460  10
  -8   3  16 715.007 520.435   2
  -7   3  16 2123.33 904.177  13
  -7  -3  16 1949.88 884.566  10
  -7   3  16 2487.56 608.980   2
  -6   3  16 3528.11 960.489  13
  -6  -3  16 1821.25 720.360  10
  -6   3  16 2596.39 619.158   2
  -5   3  16 612.770 792.558  13
  -5   3  16 305.230 504.104   2
  -4   3  16 8063.89 775.437   2
  -3   3  16 827.325 499.188   2
  -2   3  16 4279.85 632.259   2
  -1   3  16 570.695 477.354   2
   0   3  16 708.093 498.407   2
   1   3  16 2142.15 587.467   2
   2   3  16 117.506 528.814   2
   3   3  16 513.383 555.998   2
   4   3  16 582.442 587.547   2
   5   3  16 4620.84 789.199   2
   6   3  16 3971.14 882.408   2
   7   3  16 2351.73 837.230   2
   8   3  16 315.555 620.564   2
   9   3  16 1971.08 532.501   2
  -9   4  16 6035.06 710.035  13
  -8   4  16 49370.2 1530.77  13
  -7   4  16 4916.96 882.427  13
  -6   4  16 36943.7 1539.01  13
  -6   4  16 7.89158 947.508   3
  -5   4  16 42417.4 2447.81   3
  -5   4  16 47842.9 1380.94   2
  -4   4  16 37590.2 2635.85   3
  -4   4  16 45846.2 1393.35   2
  -3   4  16 45831.8 2993.07   3
  -3   4  16 59484.4 1623.28   2
  -2   4  16 2991.63 621.090   2
  -2   4  16 3194.28 1650.01   3
  -1   4  16 117554. 2285.78   2
   0   4  16 15025.5 966.211   2
   1   4  16 43933.2 2924.93   3
   1   4  16 49955.3 1592.47   2
   2   4  16 60054.9 3166.54   3
   2   4  16 60270.7 1765.75   2
   3   4  16 7212.72 1576.21   3
   3   4  16 7317.62 861.727   2
   4   4  16 79402.9 2897.07   3
   4   4  16 76479.8 2105.46   2
   5   4  16-74.0648 698.262   2
   5   4  16 85.0475 625.236   9
   5   4  16-19.2019 820.561   3
   6   4  16 44083.2 1449.08   9
   6   4  16 52463.7 1763.89   2
   7   4  16 23645.9 960.698   9
   7   4  16 28366.6 1105.47   2
  -4   5  16 1606.42 842.222   3
  -3   5  16 1197.65 878.423   3
  -2   5  16 7000.71 1221.73   3
  -1   5  16 213.742 917.586   3
   0   5  16 8494.77 1249.61   3
   1   5  16 2053.18 977.410   3
   2   5  16 3453.39 902.000   3
   3   5  16 10436.2 911.746   9
   3   5  16 11227.3 1034.35   3
   4   5  16 369.690 552.694   9
   4   5  16 424.490 573.525   3
   5   5  16 687.706 506.475   9
 -11   0  17 202.854 387.612   2
 -10   0  17 117.533 568.026   2
  -9   0  17-381.823 894.848   2
  -8   0  17 29.5774 806.240   2
  -7   0  17-328.265 741.205   2
  -6   0  17 334.671 635.253   2
  -5   0  17 73.6561 587.145   2
  -4   0  17 191.078 535.022   2
  -3   0  17 88.2826 491.395   2
  -2   0  17 519.403 496.261   2
  -1   0  17 558.169 474.958   2
   0   0  17 21.0876 506.636   2
   1   0  17 235.017 489.185   2
   2   0  17 47.9635 525.136   2
   3   0  17-61.2438 541.070   2
   4   0  17 65.2435 570.531   2
   5   0  17 26.7997 625.431   2
   6   0  17-14.5164 670.505   2
   7   0  17 128.751 769.933   2
   8   0  17 69.5670 588.487   2
 -10  -1  17 63361.4 1403.77   2
 -10   1  17 49905.0 1418.74   2
  -9  -1  17 25040.0 1217.98   2
  -9   1  17 21033.9 1236.10   2
  -8  -1  17 17004.8 1169.63   2
  -8   1  17 16599.6 1208.94   2
  -7  -1  17 78446.7 2086.27   2
  -7   1  17 86902.1 2330.69   2
  -6  -1  17 4238.61 738.866   2
  -6   1  17 3369.03 705.618   2
  -5  -1  17 69542.3 1875.00   2
  -5   1  17 69581.6 1976.43   2
  -4  -1  17 10196.9 835.875   2
  -4   1  17 10161.8 894.853   2
  -3  -1  17 49376.5 1566.00   2
  -3   1  17 47300.8 1596.14   2
  -2  -1  17 50140.7 1562.13   2
  -2   1  17 44867.6 1560.36   2
  -1  -1  17 24699.6 1167.88   2
  -1   1  17 23868.2 1190.21   2
   0  -1  17 97861.3 2164.53   2
   0   1  17 91592.7 2170.55   2
   1  -1  17 219.134 513.243   2
   1   1  17 113.356 535.077   2
   2   1  17 101584. 2328.03   2
   3   1  17 30305.2 1368.30   2
   4   1  17 48726.3 1717.90   2
   5   1  17 63037.7 1970.85   2
   6   1  17 12436.4 1090.20   2
   7   1  17 70653.1 2230.08   2
   8   1  17-54.8789 649.212   2
   9   1  17 68060.6 1552.83   2
 -10   2  17 5705.66 531.150   2
 -10   2  17 4909.92 713.075  13
  -9   2  17 1191.25 714.940  13
  -9   2  17 1668.23 549.711   2
  -8  -2  17-74.3688 1017.27  10
  -8   2  17 472.394 615.293   2
  -7   2  17 284.643 584.474   2
  -6   2  17 563.994 558.950   2
  -5   2  17 936.355 541.116   2
  -4   2  17 998.584 518.643   2
  -3   2  17-145.038 483.836   2
  -2   2  17 3316.63 633.557   2
  -1   2  17 812.217 513.963   2
   0   2  17 971.406 560.269   2
   1   2  17 987.858 548.670   2
   2   2  17 886.013 563.815   2
   3   2  17-39.0556 538.325   2
   4   2  17 3025.69 684.724   2
   5   2  17 1475.18 657.733   2
   6   2  17 4371.60 838.530   2
   7   2  17 98.7820 765.023   2
   8   2  17 40.1380 583.746   2
   9   2  17 119.396 416.235   2
  -8   3  17 23492.6 1166.17  13
  -8   3  17 27318.8 963.135   2
  -7   3  17 35827.3 1472.17  13
  -7   3  17 41810.4 1350.42   2
  -6   3  17 1901.45 799.288  13
  -6   3  17 1839.82 583.312   2
  -6   3  17 722.231 1176.93   3
  -5   3  17 80370.3 1892.31   2
  -4   3  17 7740.27 750.503   2
  -3   3  17 68512.6 1782.49   2
  -2   3  17 45694.7 1496.96   2
  -1   3  17 25450.2 1188.96   2
   0   3  17 77033.8 1928.91   2
   1   3  17 154.894 514.157   2
   2   3  17 82597.9 2051.12   2
   3   3  17 12405.4 937.383   2
   4   3  17 50995.8 1710.87   2
   5   3  17 30367.9 1233.44   9
   5   3  17 30582.9 1458.94   2
   6   3  17 5008.59 872.992   2
   7   3  17 73209.9 1862.34   2
   8   3  17 585.915 411.540   2
  -5   4  17-34.5271 815.535   3
  -4   4  17 153.724 538.428   2
  -4   4  17 2417.38 1117.45   3
  -3   4  17 6319.20 1384.88   3
  -3   4  17 7819.87 731.192   2
  -2   4  17 1646.70 534.747   2
  -2   4  17 775.537 1313.42   3
  -1   4  17 7226.86 1599.65   3
  -1   4  17 7494.82 733.175   2
   0   4  17 578.227 528.050   2
   0   4  17-302.791 1281.93   3
   1   4  17 5861.33 1455.21   3
   1   4  17 6223.71 741.339   2
   2   4  17 71.9341 579.829   2
   2   4  17-210.646 1049.39   3
   3   4  17 6623.70 1120.93   3
   3   4  17 6948.23 878.724   2
   4   4  17 1582.55 704.338   2
   4   4  17 1780.76 617.606   9
   4   4  17 2072.45 804.905   3
   5   4  17 1180.16 607.021   2
  -1   5  17 12218.0 1031.49   3
   0   5  17 38250.4 1560.21   3
   1   5  17-100.020 543.777   9
  -9   0  18 61824.3 1498.19   2
  -8   0  18 8220.39 1042.12   2
  -7   0  18 92896.0 2455.05   2
  -6   0  18 64679.6 1973.59   2
  -5   0  18 38151.6 1475.16   2
  -4   0  18 118527. 2424.44   2
  -3   0  18 1331.45 565.614   2
  -2   0  18 113753. 2332.05   2
  -1   0  18 32075.7 1333.39   2
   0   0  18 42652.2 1483.00   2
   1   0  18 70146.7 1871.46   2
   2   0  18 604.631 570.611   2
   3   0  18 45589.2 1563.23   2
   4   0  18 729.697 648.495   2
   5   0  18 67114.8 1959.80   2
   6   0  18 15657.9 1137.21   2
  -9   1  18 824.370 463.132   2
  -8   1  18 709.911 655.095   2
  -7  -1  18 1853.10 640.730   2
  -7   1  18 1508.23 744.381   2
  -6  -1  18 520.673 529.612   2
  -6   1  18 1200.11 667.083   2
  -5  -1  18 1428.01 568.705   2
  -5   1  18 1432.41 590.580   2
  -4  -1  18 286.670 478.442   2
  -4   1  18-112.686 541.331   2
  -3  -1  18 896.692 499.234   2
  -3   1  18 1578.11 561.907   2
  -2  -1  18 265.992 514.398   2
  -2   1  18 446.656 502.501   2
  -1  -1  18 3670.40 638.156   2
  -1   1  18 4128.88 656.262   2
   0   1  18 495.455 499.440   2
   1   1  18 5264.81 710.252   2
   2   1  18-67.0717 528.466   2
   3   1  18 55.2707 558.008   2
   4   1  18 341.033 624.840   2
   5   1  18 577.791 680.721   2
   6   1  18 1986.69 796.274   2
   7   1  18 429.266 587.041   2
  -8   2  18 718.823 471.401   2
  -7   2  18 33967.4 1327.68   2
  -6   2  18 22003.5 1139.80   2
  -5   2  18 35327.3 1363.23   2
  -4   2  18 77635.9 1911.50   2
  -3   2  18 3568.73 639.975   2
  -2   2  18 90735.6 2058.25   2
  -1   2  18 7474.46 782.952   2
   0   2  18 60384.9 1729.74   2
   1   2  18 39984.0 1435.52   2
   2   2  18 27219.6 1240.13   2
   3   2  18 66338.4 1853.55   2
   4   2  18 416.529 638.371   2
   5   2  18 60321.6 1852.57   2
   6   2  18 10507.5 985.358   2
   7   2  18 40754.3 1286.11   2
  -5   3  18 1104.12 539.942   2
  -4   3  18 336.892 539.624   2
  -4   3  18 98.0693 1253.68   3
  -3   3  18 7633.56 750.909   2
  -2   3  18 900.170 525.634   2
  -1   3  18 4801.11 662.763   2
   0   3  18 292.897 512.410   2
   1   3  18 5173.24 705.227   2
   2   3  18 299.263 581.899   2
   3   3  18 80.5026 603.996   2
   3   3  18 354.526 1110.61   3
   4   3  18 5901.80 787.295   2
   5   3  18 862.545 628.219   2
  -2   4  18 51681.6 2034.96   3
  -1   4  18 14886.1 1373.78   3
   0   4  18 39888.3 1904.86   3
   1   4  18 38336.0 1740.29   3
  -6   0  19 354.403 650.224   2
  -5   0  19-206.299 615.024   2
  -4   0  19-167.285 571.037   2
  -3   0  19 242.349 539.077   2
  -2   0  19-316.141 543.832   2
  -1   0  19 131.836 550.924   2
   0   0  19-2.88343 537.389   2
   1   0  19-182.332 586.162   2
   2   0  19-324.670 622.768   2
   3   0  19 155.529 611.132   2
  -6   1  19 77706.8 1981.32   2
  -5   1  19 1971.37 710.950   2
  -4   1  19 68712.0 1819.65   2
  -3   1  19 32556.5 1299.68   2
  -2   1  19 36891.0 1374.99   2
  -1   1  19 85008.0 1966.30   2
   0   1  19 229.528 576.571   2
   1   1  19 57217.3 1652.87   2
   2   1  19 33687.8 1340.57   2
   3   1  19 28772.7 1277.12   2
   4   1  19 52453.1 1649.41   2
  -5   2  19 242.020 566.533   2
  -4   2  19 937.731 549.002   2
  -3   2  19 408.304 544.985   2
  -2   2  19 988.226 566.363   2
  -1   2  19 152.432 509.540   2
   0   2  19 441.468 521.637   2
   1   2  19 302.230 546.161   2
   2   2  19 664.072 556.868   2
   3   2  19 296.264 567.712   2
   4   2  19 149.591 604.461   2
   0   0   0    0.00    0.00   0
;
_shelx_hkl_checksum   64430
